# Supplementary material
Source: publisher figshare collection journal article supplement (https://acs.figshare.com/ndownloader/files/4171888)
Supplement: Supplementary file 1 [file 4171888]

 
data_fd027_0m 
 
_audit_creation_method            SHELXL-97 
_chemical_name_systematic 
; 
 ? 
; 
_chemical_name_common             ? 
_chemical_melting_point           ? 
_chemical_formula_moiety          ? 
_chemical_formula_sum 
 'C35 H28 B F10 Li O2 S' 
_chemical_formula_weight          720.38 
 
loop_ 
 _atom_type_symbol 
 _atom_type_description 
 _atom_type_scat_dispersion_real 
 _atom_type_scat_dispersion_imag 
 _atom_type_scat_source 
 'C'  'C'   0.0033   0.0016 
 'International Tables Vol C Tables 4.2.6.8 and 6.1.1.4' 
 'H'  'H'   0.0000   0.0000 
 'International Tables Vol C Tables 4.2.6.8 and 6.1.1.4' 
 'Li'  'Li'  -0.0003   0.0001 
 'International Tables Vol C Tables 4.2.6.8 and 6.1.1.4' 
 'B'  'B'   0.0013   0.0007 
 'International Tables Vol C Tables 4.2.6.8 and 6.1.1.4' 
 'O'  'O'   0.0106   0.0060 
 'International Tables Vol C Tables 4.2.6.8 and 6.1.1.4' 
 'F'  'F'   0.0171   0.0103 
 'International Tables Vol C Tables 4.2.6.8 and 6.1.1.4' 
 'S'  'S'   0.1246   0.1234 
 'International Tables Vol C Tables 4.2.6.8 and 6.1.1.4' 
 
_symmetry_cell_setting            monoclinic 
_symmetry_space_group_name_H-M    C2/c 
 
loop_ 
 _symmetry_equiv_pos_as_xyz 
 'x, y, z' 
 '-x, y, -z+1/2' 
 'x+1/2, y+1/2, z' 
 '-x+1/2, y+1/2, -z+1/2' 
 '-x, -y, -z' 
 'x, -y, z-1/2' 
 '-x+1/2, -y+1/2, -z' 
 'x+1/2, -y+1/2, z-1/2' 
 
_cell_length_a                    19.6169(14) 
_cell_length_b                    11.0470(8) 
_cell_length_c                    16.2607(11) 
_cell_angle_alpha                 90.00 
_cell_angle_beta                  112.487(3) 
_cell_angle_gamma                 90.00 
_cell_volume                      3255.9(4) 
_cell_formula_units_Z             4 
_cell_measurement_temperature     150(2) 
_cell_measurement_reflns_used     ? 
_cell_measurement_theta_min       ? 
_cell_measurement_theta_max       ? 
 
_exptl_crystal_description        ? 
_exptl_crystal_colour             ? 
_exptl_crystal_size_max           0.25 
_exptl_crystal_size_mid           0.22
_exptl_crystal_size_min           0.19
_exptl_crystal_density_meas       ? 
_exptl_crystal_density_diffrn     1.470 
_exptl_crystal_density_method     'not measured' 
_exptl_crystal_F_000              1472 
_exptl_absorpt_coefficient_mu     0.189 
_exptl_absorpt_correction_type    multi-scan 
_exptl_absorpt_correction_T_min   0.6960  
_exptl_absorpt_correction_T_max   0.7456  
_exptl_absorpt_process_details    ? 
 
_exptl_special_details 
; 
 ? 
; 
 
_diffrn_ambient_temperature       150(2) 
_diffrn_radiation_wavelength      0.71073 
_diffrn_radiation_type            MoK\a 
_diffrn_radiation_source          'fine-focus sealed tube' 
_diffrn_radiation_monochromator   graphite 
_diffrn_measurement_device_type   ? 
_diffrn_measurement_method        ? 
_diffrn_detector_area_resol_mean  ? 
_diffrn_standards_number          ? 
_diffrn_standards_interval_count  ? 
_diffrn_standards_interval_time   ? 
_diffrn_standards_decay_%         ? 
_diffrn_reflns_number             22500 
_diffrn_reflns_av_R_equivalents   0.0293 
_diffrn_reflns_av_sigmaI/netI     0.0195 
_diffrn_reflns_limit_h_min        -23 
_diffrn_reflns_limit_h_max        23 
_diffrn_reflns_limit_k_min        -13 
_diffrn_reflns_limit_k_max        13 
_diffrn_reflns_limit_l_min        -19 
_diffrn_reflns_limit_l_max        18 
_diffrn_reflns_theta_min          2.16 
_diffrn_reflns_theta_max          25.00 
_reflns_number_total              2871 
_reflns_number_gt                 2415 
_reflns_threshold_expression      >2sigma(I) 
 
_computing_data_collection        ? 
_computing_cell_refinement        ? 
_computing_data_reduction         ? 
_computing_structure_solution     'SHELXS-97 (Sheldrick, 1990)' 
_computing_structure_refinement   'SHELXL-97 (Sheldrick, 1997)' 
_computing_molecular_graphics     ? 
_computing_publication_material   ? 
 
_refine_special_details 
; 
 Refinement of F^2^ against ALL reflections.  The weighted R-factor wR and 
 goodness of fit S are based on F^2^, conventional R-factors R are based 
 on F, with F set to zero for negative F^2^. The threshold expression of 
 F^2^ > 2sigma(F^2^) is used only for calculating R-factors(gt) etc. and is 
 not relevant to the choice of reflections for refinement.  R-factors based 
 on F^2^ are statistically about twice as large as those based on F, and R- 
 factors based on ALL data will be even larger. 
; 
 
_refine_ls_structure_factor_coef  Fsqd  
_refine_ls_matrix_type            full 
_refine_ls_weighting_scheme       calc  
_refine_ls_weighting_details 
 'calc w=1/[\s^2^(Fo^2^)+(0.0001P)^2^+22.4022P] where P=(Fo^2^+2Fc^2^)/3' 
_atom_sites_solution_primary      direct 
_atom_sites_solution_secondary    difmap 
_atom_sites_solution_hydrogens    geom 
_refine_ls_hydrogen_treatment     mixed 
_refine_ls_extinction_method      none 
_refine_ls_extinction_coef        ? 
_refine_ls_number_reflns          2871 
_refine_ls_number_parameters      245 
_refine_ls_number_restraints      0 
_refine_ls_R_factor_all           0.1020 
_refine_ls_R_factor_gt            0.0890 
_refine_ls_wR_factor_ref          0.1646 
_refine_ls_wR_factor_gt           0.1585 
_refine_ls_goodness_of_fit_ref    1.144 
_refine_ls_restrained_S_all       1.144 
_refine_ls_shift/su_max           0.000 
_refine_ls_shift/su_mean          0.000 
 
loop_ 
 _atom_site_label 
 _atom_site_type_symbol 
 _atom_site_fract_x 
 _atom_site_fract_y 
 _atom_site_fract_z 
 _atom_site_U_iso_or_equiv 
 _atom_site_adp_type 
 _atom_site_occupancy 
 _atom_site_symmetry_multiplicity 
 _atom_site_calc_flag 
 _atom_site_refinement_flags 
 _atom_site_disorder_assembly 
 _atom_site_disorder_group 
Li1 Li 0.0000 0.9755(9) 0.2500 0.047(3) Uani 1 2 d S . . 
S1 S 0.04266(17) 0.8487(3) 0.14916(19) 0.0336(6) Uani 0.50 1 d P . . 
O1 O -0.07482(18) 1.0761(3) 0.1741(2) 0.0516(8) Uani 1 1 d . . . 
B1 B 0.0000 0.6802(6) 0.2500 0.071(3) Uani 1 2 d S . . 
F1 F -0.1439(2) 0.7250(3) 0.0929(3) 0.1048(16) Uani 1 1 d . . . 
F2 F -0.19913(18) 0.5925(4) -0.0519(3) 0.1183(17) Uani 1 1 d . . . 
F3 F -0.12766(19) 0.3905(3) -0.0728(2) 0.0889(12) Uani 1 1 d . . . 
F4 F 0.00236(17) 0.3274(3) 0.05771(19) 0.0599(8) Uani 1 1 d . . . 
F5 F 0.06061(14) 0.4594(2) 0.20412(17) 0.0492(7) Uani 1 1 d . . . 
C1 C 0.1151(2) 0.9410(4) 0.1593(3) 0.0424(11) Uani 1 1 d . . . 
C2 C 0.0897(3) 1.0453(5) 0.1090(3) 0.0583(13) Uani 1 1 d . . . 
H2A H 0.0381 1.0599 0.0814 0.070 Uiso 1 1 calc R . . 
C3 C 0.1380(4) 1.1266(5) 0.0989(4) 0.0732(18) Uani 1 1 d . . . 
H3A H 0.1201 1.1965 0.0631 0.088 Uiso 1 1 calc R . . 
C4 C 0.2118(4) 1.1081(5) 0.1398(4) 0.0715(18) Uani 1 1 d . . . 
H4A H 0.2453 1.1667 0.1343 0.086 Uiso 1 1 calc R . . 
C5 C 0.2385(3) 1.0048(5) 0.1893(4) 0.0663(16) Uani 1 1 d . . . 
H5A H 0.2902 0.9911 0.2159 0.080 Uiso 1 1 calc R . . 
C6 C 0.1900(3) 0.9204(4) 0.2004(4) 0.0514(12) Uani 1 1 d . . . 
H6A H 0.2081 0.8500 0.2355 0.062 Uiso 1 1 calc R . . 
C7 C 0.0327(5) 0.7790(7) 0.2128(5) 0.0296(17) Uani 0.50 1 d P . . 
C8 C 0.0679(7) 0.8504(11) 0.1905(8) 0.036(3) Uani 0.50 1 d P . . 
C9 C 0.0829(5) 0.7485(7) 0.2421(5) 0.0294(17) Uani 0.50 1 d P . . 
H9A H 0.1123 0.7917 0.2963 0.035 Uiso 0.50 1 d P . . 
H9B H 0.1145 0.6882 0.2314 0.035 Uiso 0.50 1 d P . . 
C10 C -0.0396(3) 0.5980(4) 0.1595(3) 0.0475(12) Uani 1 1 d . . . 
C11 C -0.1046(3) 0.6252(5) 0.0902(5) 0.0669(18) Uani 1 1 d . . . 
C12 C -0.1349(3) 0.5579(6) 0.0124(5) 0.0746(19) Uani 1 1 d . . . 
C13 C -0.0995(3) 0.4573(5) 0.0017(4) 0.0603(15) Uani 1 1 d . . . 
C14 C -0.0333(3) 0.4259(4) 0.0678(3) 0.0452(11) Uani 1 1 d . . . 
C15 C -0.0054(2) 0.4964(4) 0.1429(3) 0.0399(10) Uani 1 1 d . . . 
C16 C -0.1316(4) 1.0320(6) 0.0952(4) 0.087(2) Uani 1 1 d . . . 
H16A H -0.1610 0.9691 0.1100 0.105 Uiso 1 1 calc R . . 
H16B H -0.1100 0.9963 0.0548 0.105 Uiso 1 1 calc R . . 
C17 C -0.1792(4) 1.1380(6) 0.0518(4) 0.0826(19) Uani 1 1 d . . . 
H17A H -0.2310 1.1134 0.0183 0.099 Uiso 1 1 calc R . . 
H17B H -0.1605 1.1814 0.0114 0.099 Uiso 1 1 calc R . . 
C18 C -0.1717(4) 1.2139(7) 0.1324(5) 0.103(3) Uani 1 1 d . . . 
H18A H -0.1812 1.3004 0.1162 0.123 Uiso 1 1 calc R . . 
H18B H -0.2063 1.1862 0.1596 0.123 Uiso 1 1 calc R . . 
C19 C -0.0952(4) 1.1950(5) 0.1930(4) 0.0752(18) Uani 1 1 d . . . 
H19A H -0.0628 1.2571 0.1830 0.090 Uiso 1 1 calc R . . 
H19B H -0.0908 1.2001 0.2556 0.090 Uiso 1 1 calc R . . 
 
loop_ 
 _atom_site_aniso_label 
 _atom_site_aniso_U_11 
 _atom_site_aniso_U_22 
 _atom_site_aniso_U_33 
 _atom_site_aniso_U_23 
 _atom_site_aniso_U_13 
 _atom_site_aniso_U_12 
Li1 0.055(7) 0.029(5) 0.061(7) 0.000 0.027(6) 0.000 
S1 0.0383(17) 0.0268(12) 0.0369(16) 0.0015(14) 0.0157(13) -0.0023(12) 
O1 0.059(2) 0.0395(18) 0.052(2) -0.0068(15) 0.0162(16) -0.0026(16) 
B1 0.144(9) 0.017(3) 0.100(7) 0.000 0.101(8) 0.000 
F1 0.088(2) 0.052(2) 0.213(5) 0.057(2) 0.100(3) 0.0378(18) 
F2 0.052(2) 0.105(3) 0.169(4) 0.077(3) 0.010(2) -0.002(2) 
F3 0.085(2) 0.100(3) 0.061(2) 0.012(2) 0.0047(18) -0.037(2) 
F4 0.080(2) 0.0468(17) 0.0605(18) -0.0129(14) 0.0349(16) 0.0043(15) 
F5 0.0576(16) 0.0380(14) 0.0534(16) -0.0040(12) 0.0227(13) 0.0140(13) 
C1 0.045(3) 0.034(2) 0.056(3) -0.014(2) 0.027(2) -0.006(2) 
C2 0.064(3) 0.059(3) 0.057(3) 0.000(3) 0.029(3) 0.006(3) 
C3 0.102(5) 0.058(4) 0.084(4) 0.016(3) 0.063(4) 0.010(3) 
C4 0.099(5) 0.041(3) 0.106(5) -0.003(3) 0.074(4) -0.019(3) 
C5 0.046(3) 0.076(4) 0.087(4) -0.016(3) 0.037(3) -0.014(3) 
C6 0.046(3) 0.041(3) 0.072(3) -0.002(2) 0.028(3) -0.006(2) 
C7 0.027(4) 0.029(4) 0.027(4) -0.005(3) 0.003(4) 0.000(4) 
C8 0.040(7) 0.033(5) 0.039(7) -0.010(6) 0.020(5) -0.007(5) 
C9 0.033(5) 0.029(4) 0.025(4) 0.003(3) 0.009(4) -0.001(4) 
C10 0.063(3) 0.024(2) 0.078(3) 0.016(2) 0.053(3) 0.008(2) 
C11 0.059(3) 0.040(3) 0.126(6) 0.038(3) 0.062(4) 0.016(3) 
C12 0.041(3) 0.062(4) 0.116(6) 0.045(4) 0.025(3) 0.001(3) 
C13 0.058(3) 0.062(4) 0.057(3) 0.016(3) 0.017(3) -0.021(3) 
C14 0.055(3) 0.036(2) 0.053(3) 0.003(2) 0.030(2) -0.004(2) 
C15 0.050(3) 0.034(2) 0.047(3) 0.005(2) 0.030(2) 0.004(2) 
C16 0.081(4) 0.057(4) 0.090(5) -0.014(3) -0.004(4) -0.001(3) 
C17 0.091(5) 0.062(4) 0.076(4) 0.015(3) 0.012(4) -0.006(3) 
C18 0.119(6) 0.090(5) 0.092(5) 0.020(4) 0.033(5) 0.058(5) 
C19 0.129(6) 0.044(3) 0.060(4) 0.004(3) 0.045(4) 0.015(3) 
 
_geom_special_details 
; 
 All esds (except the esd in the dihedral angle between two l.s. planes) 
 are estimated using the full covariance matrix.  The cell esds are taken 
 into account individually in the estimation of esds in distances, angles 
 and torsion angles; correlations between esds in cell parameters are only 
 used when they are defined by crystal symmetry.  An approximate (isotropic) 
 treatment of cell esds is used for estimating esds involving l.s. planes. 
; 
 
loop_ 
 _geom_bond_atom_site_label_1 
 _geom_bond_atom_site_label_2 
 _geom_bond_distance 
 _geom_bond_site_symmetry_2 
 _geom_bond_publ_flag 
Li1 O1 1.878(7) 2 ? 
Li1 O1 1.878(7) . ? 
Li1 C8 2.368(13) 2 ? 
Li1 C8 2.368(13) . ? 
Li1 C7 2.405(12) . ? 
Li1 C7 2.405(12) 2 ? 
Li1 S1 2.530(6) 2 ? 
Li1 S1 2.530(6) . ? 
S1 C8 0.666(10) . ? 
S1 C7 1.363(9) . ? 
S1 C1 1.705(5) . ? 
S1 C9 1.794(8) . ? 
O1 C16 1.425(6) . ? 
O1 C19 1.440(6) . ? 
B1 C7 1.505(10) . ? 
B1 C7 1.505(10) 2 ? 
B1 C10 1.649(6) . ? 
B1 C10 1.649(6) 2 ? 
B1 C9 1.841(9) 2 ? 
B1 C9 1.841(9) . ? 
F1 C11 1.356(6) . ? 
F2 C12 1.349(6) . ? 
F3 C13 1.344(6) . ? 
F4 C14 1.338(5) . ? 
F5 C15 1.360(5) . ? 
C1 C6 1.380(6) . ? 
C1 C2 1.391(7) . ? 
C1 C8 1.573(13) . ? 
C2 C3 1.361(8) . ? 
C3 C4 1.358(8) . ? 
C4 C5 1.380(8) . ? 
C5 C6 1.391(7) . ? 
C7 C9 0.976(10) . ? 
C7 C8 1.193(14) . ? 
C8 C9 1.367(15) . ? 
C10 C11 1.373(8) . ? 
C10 C15 1.385(6) . ? 
C11 C12 1.389(9) . ? 
C12 C13 1.357(8) . ? 
C13 C14 1.376(7) . ? 
C14 C15 1.372(6) . ? 
C16 C17 1.495(8) . ? 
C17 C18 1.515(9) . ? 
C18 C19 1.460(9) . ? 
 
loop_ 
 _geom_angle_atom_site_label_1 
 _geom_angle_atom_site_label_2 
 _geom_angle_atom_site_label_3 
 _geom_angle 
 _geom_angle_site_symmetry_1 
 _geom_angle_site_symmetry_3 
 _geom_angle_publ_flag 
O1 Li1 O1 107.4(5) 2 . ? 
O1 Li1 C8 119.8(3) 2 2 ? 
O1 Li1 C8 101.1(3) . 2 ? 
O1 Li1 C8 101.1(3) 2 . ? 
O1 Li1 C8 119.8(3) . . ? 
C8 Li1 C8 108.6(7) 2 . ? 
O1 Li1 C7 118.9(3) 2 . ? 
O1 Li1 C7 125.8(3) . . ? 
C8 Li1 C7 79.7(5) 2 . ? 
C8 Li1 C7 28.9(4) . . ? 
O1 Li1 C7 125.8(3) 2 2 ? 
O1 Li1 C7 118.9(3) . 2 ? 
C8 Li1 C7 28.9(4) 2 2 ? 
C8 Li1 C7 79.7(5) . 2 ? 
C7 Li1 C7 51.0(4) . 2 ? 
O1 Li1 S1 105.70(12) 2 2 ? 
O1 Li1 S1 112.62(12) . 2 ? 
C8 Li1 S1 15.2(3) 2 2 ? 
C8 Li1 S1 108.6(5) . 2 ? 
C7 Li1 S1 81.3(4) . 2 ? 
C7 Li1 S1 31.9(2) 2 2 ? 
O1 Li1 S1 112.62(12) 2 . ? 
O1 Li1 S1 105.70(12) . . ? 
C8 Li1 S1 108.6(5) 2 . ? 
C8 Li1 S1 15.2(3) . . ? 
C7 Li1 S1 31.9(2) . . ? 
C7 Li1 S1 81.3(4) 2 . ? 
S1 Li1 S1 112.8(4) 2 . ? 
C8 S1 C7 61.1(13) . . ? 
C8 S1 C1 67.3(13) . . ? 
C7 S1 C1 128.4(4) . . ? 
C8 S1 C9 41.3(13) . . ? 
C7 S1 C9 32.5(4) . . ? 
C1 S1 C9 101.8(3) . . ? 
C8 S1 Li1 68.5(12) . . ? 
C7 S1 Li1 69.0(4) . . ? 
C1 S1 Li1 94.4(2) . . ? 
C9 S1 Li1 86.8(3) . . ? 
C16 O1 C19 108.5(4) . . ? 
C16 O1 Li1 122.4(4) . . ? 
C19 O1 Li1 127.6(4) . . ? 
C7 B1 C7 87.0(7) . 2 ? 
C7 B1 C10 99.7(3) . . ? 
C7 B1 C10 129.1(4) 2 . ? 
C7 B1 C10 129.1(4) . 2 ? 
C7 B1 C10 99.7(3) 2 2 ? 
C10 B1 C10 113.2(5) . 2 ? 
C7 B1 C9 104.7(6) . 2 ? 
C7 B1 C9 31.9(4) 2 2 ? 
C10 B1 C9 99.3(3) . 2 ? 
C10 B1 C9 106.8(3) 2 2 ? 
C7 B1 C9 31.9(4) . . ? 
C7 B1 C9 104.7(6) 2 . ? 
C10 B1 C9 106.8(3) . . ? 
C10 B1 C9 99.3(3) 2 . ? 
C9 B1 C9 131.6(7) 2 . ? 
C6 C1 C2 119.8(4) . . ? 
C6 C1 C8 112.9(6) . . ? 
C2 C1 C8 126.4(6) . . ? 
C6 C1 S1 130.0(4) . . ? 
C2 C1 S1 109.9(4) . . ? 
C8 C1 S1 23.0(4) . . ? 
C3 C2 C1 120.5(5) . . ? 
C4 C3 C2 120.2(6) . . ? 
C3 C4 C5 120.4(5) . . ? 
C4 C5 C6 120.3(5) . . ? 
C1 C6 C5 118.8(5) . . ? 
C9 C7 C8 77.4(10) . . ? 
C9 C7 S1 98.9(8) . . ? 
C8 C7 S1 29.3(5) . . ? 
C9 C7 B1 93.4(8) . . ? 
C8 C7 B1 170.8(10) . . ? 
S1 C7 B1 157.2(6) . . ? 
C9 C7 Li1 120.4(7) . . ? 
C8 C7 Li1 73.8(7) . . ? 
S1 C7 Li1 79.1(4) . . ? 
B1 C7 Li1 111.0(5) . . ? 
S1 C8 C7 89.7(14) . . ? 
S1 C8 C9 119.9(16) . . ? 
C7 C8 C9 44.2(6) . . ? 
S1 C8 C1 89.7(14) . . ? 
C7 C8 C1 178.1(11) . . ? 
C9 C8 C1 135.0(10) . . ? 
S1 C8 Li1 96.4(13) . . ? 
C7 C8 Li1 77.3(7) . . ? 
C9 C8 Li1 104.6(8) . . ? 
C1 C8 Li1 104.7(7) . . ? 
C7 C9 C8 58.4(8) . . ? 
C7 C9 S1 48.6(6) . . ? 
C8 C9 S1 18.8(5) . . ? 
C7 C9 B1 54.7(7) . . ? 
C8 C9 B1 113.1(8) . . ? 
S1 C9 B1 101.3(5) . . ? 
C11 C10 C15 112.6(5) . . ? 
C11 C10 B1 125.7(4) . . ? 
C15 C10 B1 121.5(4) . . ? 
F1 C11 C10 120.9(6) . . ? 
F1 C11 C12 114.4(6) . . ? 
C10 C11 C12 124.7(5) . . ? 
F2 C12 C13 120.2(7) . . ? 
F2 C12 C11 120.2(6) . . ? 
C13 C12 C11 119.5(5) . . ? 
F3 C13 C12 120.8(6) . . ? 
F3 C13 C14 120.4(5) . . ? 
C12 C13 C14 118.8(6) . . ? 
F4 C14 C15 121.4(4) . . ? 
F4 C14 C13 119.4(5) . . ? 
C15 C14 C13 119.2(5) . . ? 
F5 C15 C14 115.2(4) . . ? 
F5 C15 C10 119.8(4) . . ? 
C14 C15 C10 125.1(5) . . ? 
O1 C16 C17 106.8(5) . . ? 
C16 C17 C18 100.9(5) . . ? 
C19 C18 C17 103.9(5) . . ? 
O1 C19 C18 106.5(5) . . ? 
 
_diffrn_measured_fraction_theta_max    0.998 
_diffrn_reflns_theta_full              25.00 
_diffrn_measured_fraction_theta_full   0.998 
_refine_diff_density_max    0.524 
_refine_diff_density_min   -0.492 
_refine_diff_density_rms    0.063 
#===END
 
data_fd029-sr
 
_audit_creation_method            SHELXL-97
_chemical_name_systematic
;
 ?
;
_chemical_name_common             ?
_chemical_melting_point           ?
_chemical_formula_moiety          ?
_chemical_formula_sum
 'C64 H43 B F10 O0.25 P2 Ru S'
_chemical_formula_weight          1211.86
 
loop_
 _atom_type_symbol
 _atom_type_description
 _atom_type_scat_dispersion_real
 _atom_type_scat_dispersion_imag
 _atom_type_scat_source
 'C'  'C'   0.0033   0.0016
 'International Tables Vol C Tables 4.2.6.8 and 6.1.1.4'
 'H'  'H'   0.0000   0.0000
 'International Tables Vol C Tables 4.2.6.8 and 6.1.1.4'
 'B'  'B'   0.0013   0.0007
 'International Tables Vol C Tables 4.2.6.8 and 6.1.1.4'
 'F'  'F'   0.0171   0.0103
 'International Tables Vol C Tables 4.2.6.8 and 6.1.1.4'
 'P'  'P'   0.1023   0.0942
 'International Tables Vol C Tables 4.2.6.8 and 6.1.1.4'
 'S'  'S'   0.1246   0.1234
 'International Tables Vol C Tables 4.2.6.8 and 6.1.1.4'
 'Ru'  'Ru'  -1.2594   0.8363
 'International Tables Vol C Tables 4.2.6.8 and 6.1.1.4'
 'O'  'O'   0.0106   0.0060
 'International Tables Vol C Tables 4.2.6.8 and 6.1.1.4'
 
_symmetry_cell_setting            tetragonal
_symmetry_space_group_name_H-M    I4(1)/a
 
loop_
 _symmetry_equiv_pos_as_xyz
 'x, y, z'
 '-x+1/2, -y, z+1/2'
 '-y+3/4, x+1/4, z+1/4'
 'y+3/4, -x+3/4, z+3/4'
 'x+1/2, y+1/2, z+1/2'
 '-x+1, -y+1/2, z+1'
 '-y+5/4, x+3/4, z+3/4'
 'y+5/4, -x+5/4, z+5/4'
 '-x, -y, -z'
 'x-1/2, y, -z-1/2'
 'y-3/4, -x-1/4, -z-1/4'
 '-y-3/4, x-3/4, -z-3/4'
 '-x+1/2, -y+1/2, -z+1/2'
 'x, y+1/2, -z'
 'y-1/4, -x+1/4, -z+1/4'
 '-y-1/4, x-1/4, -z-1/4'
 
_cell_length_a                    41.347(4)
_cell_length_b                    41.347(4)
_cell_length_c                    13.4355(19)
_cell_angle_alpha                 90.00
_cell_angle_beta                  90.00
_cell_angle_gamma                 90.00
_cell_volume                      22968(5)
_cell_formula_units_Z             16
_cell_measurement_temperature     150(2)
_cell_measurement_reflns_used     ?
_cell_measurement_theta_min       ?
_cell_measurement_theta_max       ?
 
_exptl_crystal_description        ?
_exptl_crystal_colour             ?
_exptl_crystal_size_max           0.22
_exptl_crystal_size_mid           0.17
_exptl_crystal_size_min           0.16
_exptl_crystal_density_meas       ?
_exptl_crystal_density_diffrn     1.402
_exptl_crystal_density_method     'not measured'
_exptl_crystal_F_000              9824
_exptl_absorpt_coefficient_mu     0.438
_exptl_absorpt_correction_type    ?
_exptl_absorpt_correction_T_min   ?
_exptl_absorpt_correction_T_max   ?
_exptl_absorpt_process_details    ?
 
_exptl_special_details
;
 ?
;
 
_diffrn_ambient_temperature       150(2)
_diffrn_radiation_wavelength      0.71073
_diffrn_radiation_type            MoK\a
_diffrn_radiation_source          'fine-focus sealed tube'
_diffrn_radiation_monochromator   graphite
_diffrn_measurement_device_type   ?
_diffrn_measurement_method        ?
_diffrn_detector_area_resol_mean  ?
_diffrn_standards_number          ?
_diffrn_standards_interval_count  ?
_diffrn_standards_interval_time   ?
_diffrn_standards_decay_%         ?
_diffrn_reflns_number             155362
_diffrn_reflns_av_R_equivalents   0.0816
_diffrn_reflns_av_sigmaI/netI     0.0409
_diffrn_reflns_limit_h_min        -48
_diffrn_reflns_limit_h_max        49
_diffrn_reflns_limit_k_min        -49
_diffrn_reflns_limit_k_max        49
_diffrn_reflns_limit_l_min        -15
_diffrn_reflns_limit_l_max        15
_diffrn_reflns_theta_min          1.87
_diffrn_reflns_theta_max          24.99
_reflns_number_total              10113
_reflns_number_gt                 8084
_reflns_threshold_expression      >2sigma(I)
 
_computing_data_collection        ?
_computing_cell_refinement        ?
_computing_data_reduction         ?
_computing_structure_solution     'SHELXS-97 (Sheldrick, 1990)'
_computing_structure_refinement   'SHELXL-97 (Sheldrick, 1997)'
_computing_molecular_graphics     ?
_computing_publication_material   ?
 
_refine_special_details
;
 Refinement of F^2^ against ALL reflections.  The weighted R-factor wR and
 goodness of fit S are based on F^2^, conventional R-factors R are based
 on F, with F set to zero for negative F^2^. The threshold expression of
 F^2^ > 2sigma(F^2^) is used only for calculating R-factors(gt) etc. and is
 not relevant to the choice of reflections for refinement.  R-factors based
 on F^2^ are statistically about twice as large as those based on F, and R-
 factors based on ALL data will be even larger.
;

_refine_ls_structure_factor_coef  Fsqd
_refine_ls_matrix_type            full
_refine_ls_weighting_scheme       calc
_refine_ls_weighting_details
 'calc w=1/[\s^2^(Fo^2^)+(0.0502P)^2^+48.2799P] where P=(Fo^2^+2Fc^2^)/3'
_atom_sites_solution_primary      direct
_atom_sites_solution_secondary    difmap
_atom_sites_solution_hydrogens    geom
_refine_ls_hydrogen_treatment     mixed
_refine_ls_extinction_method      none
_refine_ls_extinction_coef        ?
_refine_ls_number_reflns          10113
_refine_ls_number_parameters      715
_refine_ls_number_restraints      0
_refine_ls_R_factor_all           0.0716
_refine_ls_R_factor_gt            0.0497
_refine_ls_wR_factor_ref          0.1170
_refine_ls_wR_factor_gt           0.1085
_refine_ls_goodness_of_fit_ref    1.089
_refine_ls_restrained_S_all       1.089
_refine_ls_shift/su_max           0.003
_refine_ls_shift/su_mean          0.000
 
loop_
 _atom_site_label
 _atom_site_type_symbol
 _atom_site_fract_x
 _atom_site_fract_y
 _atom_site_fract_z
 _atom_site_U_iso_or_equiv
 _atom_site_adp_type
 _atom_site_occupancy
 _atom_site_symmetry_multiplicity
 _atom_site_calc_flag
 _atom_site_refinement_flags
 _atom_site_disorder_assembly
 _atom_site_disorder_group
C43 C 0.64648(11) 0.57678(11) 0.5783(3) 0.0507(11) Uani 1 1 d . . .
H43A H 0.6600 0.5797 0.5219 0.061 Uiso 1 1 calc R . .
C56 C 0.5428(2) 0.73621(15) 0.8793(5) 0.119(3) Uani 1 1 d . . .
H56A H 0.5387 0.7543 0.8376 0.142 Uiso 1 1 calc R . .
C57 C 0.55176(17) 0.70683(14) 0.8384(4) 0.095(2) Uani 1 1 d . . .
H57A H 0.5527 0.7045 0.7681 0.114 Uiso 1 1 calc R . .
C54 C 0.54693(13) 0.71344(12) 1.0401(4) 0.0645(14) Uani 1 1 d . . .
H54A H 0.5455 0.7156 1.1103 0.077 Uiso 1 1 calc R . .
C55 C 0.53969(14) 0.73894(13) 0.9809(4) 0.0783(17) Uani 1 1 d . . .
H55A H 0.5325 0.7587 1.0095 0.094 Uiso 1 1 calc R . .
Ru1 Ru 0.575687(7) 0.604815(7) 0.96298(2) 0.02825(10) Uani 1 1 d . . .
S1 S 0.63119(2) 0.61098(2) 1.03456(6) 0.0310(2) Uani 1 1 d . . .
P2 P 0.57859(2) 0.64485(2) 0.84513(7) 0.0306(2) Uani 1 1 d . . .
P1 P 0.58120(2) 0.56349(2) 0.85560(7) 0.0330(2) Uani 1 1 d . . .
F1 F 0.53842(5) 0.59630(5) 1.31822(15) 0.0390(5) Uani 1 1 d . . .
F2 F 0.51971(6) 0.55444(6) 1.46014(16) 0.0511(6) Uani 1 1 d . . .
F10 F 0.64985(5) 0.60366(6) 1.34580(15) 0.0445(6) Uani 1 1 d . . .
F3 F 0.55759(7) 0.50362(6) 1.50935(18) 0.0619(7) Uani 1 1 d . . .
C11 C 0.54756(10) 0.54989(9) 1.4118(3) 0.0364(9) Uani 1 1 d . . .
C46 C 0.55772(9) 0.64124(9) 0.7250(3) 0.0357(9) Uani 1 1 d . . .
C9 C 0.58690(9) 0.56774(8) 1.2865(3) 0.0315(8) Uani 1 1 d . . .
C29 C 0.58879(10) 0.52240(9) 1.0185(3) 0.0371(9) Uani 1 1 d . . .
H29A H 0.5744 0.5370 1.0503 0.045 Uiso 1 1 calc R . .
C52 C 0.55943(9) 0.68091(9) 0.8985(3) 0.0390(9) Uani 1 1 d . . .
C15 C 0.60421(9) 0.62851(9) 1.2703(2) 0.0310(8) Uani 1 1 d . . .
C28 C 0.59827(10) 0.52817(9) 0.9209(3) 0.0374(9) Uani 1 1 d . . .
C8 C 0.57040(8) 0.59882(8) 1.1212(3) 0.0272(8) Uani 1 1 d . . .
C7 C 0.54299(9) 0.59652(8) 1.0805(2) 0.0288(8) Uani 1 1 d . . .
C22 C 0.66792(9) 0.59867(10) 0.9760(3) 0.0390(10) Uani 1 1 d . . .
C20 C 0.63066(10) 0.63007(9) 1.3342(3) 0.0380(9) Uani 1 1 d . . .
C27 C 0.67969(10) 0.56731(12) 0.9830(3) 0.0517(11) Uani 1 1 d . . .
H27A H 0.6678 0.5512 1.0174 0.062 Uiso 1 1 calc R . .
C59 C 0.63688(9) 0.64891(11) 0.7368(3) 0.0430(10) Uani 1 1 d . . .
H59A H 0.6299 0.6299 0.7036 0.052 Uiso 1 1 calc R . .
C10 C 0.55804(9) 0.57082(9) 1.3384(3) 0.0325(8) Uani 1 1 d . . .
C41 C 0.64002(10) 0.56603(10) 0.7524(3) 0.0465(10) Uani 1 1 d . . .
H41A H 0.6495 0.5620 0.8156 0.056 Uiso 1 1 calc R . .
C48 C 0.51075(10) 0.62174(13) 0.6344(3) 0.0588(13) Uani 1 1 d . . .
H48A H 0.4905 0.6109 0.6347 0.071 Uiso 1 1 calc R . .
C60 C 0.66566(10) 0.66336(12) 0.7097(3) 0.0522(12) Uani 1 1 d . . .
H60A H 0.6782 0.6544 0.6571 0.063 Uiso 1 1 calc R . .
C1 C 0.50825(9) 0.59127(9) 1.0908(3) 0.0319(8) Uani 1 1 d . . .
C40 C 0.60640(9) 0.56694(9) 0.7436(3) 0.0361(9) Uani 1 1 d . . .
C34 C 0.54350(10) 0.54482(9) 0.8081(3) 0.0398(9) Uani 1 1 d . . .
B1 B 0.59800(10) 0.59542(10) 1.2048(3) 0.0291(9) Uani 1 1 d . . .
C53 C 0.55641(11) 0.68430(10) 0.9990(3) 0.0519(11) Uani 1 1 d . . .
H53A H 0.5609 0.6664 1.0413 0.062 Uiso 1 1 calc R . .
C58 C 0.61800(9) 0.66203(9) 0.8122(3) 0.0351(9) Uani 1 1 d . . .
C12 C 0.56695(11) 0.52395(9) 1.4368(3) 0.0433(10) Uani 1 1 d . . .
C42 C 0.65970(11) 0.57088(11) 0.6708(3) 0.0522(11) Uani 1 1 d . . .
H42A H 0.6825 0.5702 0.6784 0.063 Uiso 1 1 calc R . .
C45 C 0.59318(10) 0.57321(9) 0.6502(3) 0.0407(10) Uani 1 1 d . . .
H45A H 0.5704 0.5739 0.6423 0.049 Uiso 1 1 calc R . .
C21 C 0.63034(9) 0.58491(9) 1.1424(3) 0.0327(8) Uani 1 1 d . . .
H21A H 0.6291 0.5619 1.1220 0.039 Uiso 1 1 calc R . .
H21B H 0.6500 0.5880 1.1833 0.039 Uiso 1 1 calc R . .
C61 C 0.67638(10) 0.69069(12) 0.7585(4) 0.0559(12) Uani 1 1 d . . .
H61A H 0.6958 0.7010 0.7382 0.067 Uiso 1 1 calc R . .
C30 C 0.59995(11) 0.49564(9) 1.0701(3) 0.0479(11) Uani 1 1 d . . .
H30A H 0.5933 0.4922 1.1370 0.057 Uiso 1 1 calc R . .
C33 C 0.61853(11) 0.50576(10) 0.8747(3) 0.0553(12) Uani 1 1 d . . .
H33A H 0.6249 0.5088 0.8074 0.066 Uiso 1 1 calc R . .
C13 C 0.59539(11) 0.51932(9) 1.3877(3) 0.0437(10) Uani 1 1 d . . .
C14 C 0.60500(10) 0.54099(9) 1.3152(3) 0.0373(9) Uani 1 1 d . . .
C63 C 0.62973(10) 0.68890(10) 0.8636(3) 0.0447(10) Uani 1 1 d . . .
H63A H 0.6176 0.6975 0.9174 0.054 Uiso 1 1 calc R . .
C47 C 0.52800(9) 0.62517(11) 0.7220(3) 0.0463(10) Uani 1 1 d . . .
H47A H 0.5194 0.6164 0.7817 0.056 Uiso 1 1 calc R . .
F6 F 0.55819(6) 0.65823(5) 1.21619(16) 0.0487(6) Uani 1 1 d . . .
F7 F 0.57402(8) 0.71003(6) 1.3212(2) 0.0734(8) Uani 1 1 d . . .
F9 F 0.66524(7) 0.65603(7) 1.44959(19) 0.0718(8) Uani 1 1 d . . .
F4 F 0.61448(7) 0.49397(6) 1.41195(19) 0.0651(7) Uani 1 1 d . . .
C6 C 0.48743(10) 0.61662(11) 1.1088(3) 0.0458(10) Uani 1 1 d . . .
H6A H 0.4956 0.6380 1.1125 0.055 Uiso 1 1 calc R . .
C49 C 0.52295(11) 0.63396(14) 0.5472(3) 0.0656(15) Uani 1 1 d . . .
H49A H 0.5113 0.6315 0.4867 0.079 Uiso 1 1 calc R . .
C44 C 0.61299(11) 0.57846(10) 0.5689(3) 0.0468(11) Uani 1 1 d . . .
H44A H 0.6037 0.5833 0.5060 0.056 Uiso 1 1 calc R . .
C36 C 0.51683(13) 0.50362(13) 0.7120(4) 0.0699(15) Uani 1 1 d . . .
H36A H 0.5182 0.4864 0.6654 0.084 Uiso 1 1 calc R . .
C23 C 0.68522(9) 0.62223(12) 0.9255(3) 0.0499(11) Uani 1 1 d . . .
H23A H 0.6772 0.6437 0.9212 0.060 Uiso 1 1 calc R . .
C5 C 0.45457(10) 0.61116(12) 1.1216(3) 0.0527(12) Uani 1 1 d . . .
H5A H 0.4406 0.6289 1.1347 0.063 Uiso 1 1 calc R . .
C39 C 0.51325(10) 0.55338(11) 0.8463(3) 0.0517(11) Uani 1 1 d . . .
H39A H 0.5117 0.5706 0.8930 0.062 Uiso 1 1 calc R . .
C31 C 0.62062(12) 0.47409(10) 1.0247(4) 0.0591(13) Uani 1 1 d . . .
H31A H 0.6288 0.4560 1.0604 0.071 Uiso 1 1 calc R . .
C4 C 0.44210(11) 0.58118(13) 1.1157(3) 0.0559(12) Uani 1 1 d . . .
H4A H 0.4195 0.5779 1.1221 0.067 Uiso 1 1 calc R . .
C32 C 0.62925(13) 0.47915(11) 0.9267(4) 0.0681(15) Uani 1 1 d . . .
H32A H 0.6429 0.4639 0.8944 0.082 Uiso 1 1 calc R . .
C26 C 0.70944(13) 0.55980(16) 0.9383(4) 0.0743(16) Uani 1 1 d . . .
H26A H 0.7179 0.5385 0.9432 0.089 Uiso 1 1 calc R . .
C2 C 0.49532(11) 0.56069(11) 1.0884(4) 0.0599(13) Uani 1 1 d . . .
H2A H 0.5091 0.5426 1.0785 0.072 Uiso 1 1 calc R . .
C35 C 0.54467(11) 0.51955(11) 0.7404(3) 0.0547(12) Uani 1 1 d . . .
H35A H 0.5649 0.5131 0.7133 0.066 Uiso 1 1 calc R . .
C38 C 0.48549(12) 0.53723(12) 0.8174(4) 0.0654(14) Uani 1 1 d . . .
H38A H 0.4651 0.5433 0.8440 0.078 Uiso 1 1 calc R . .
C51 C 0.56904(11) 0.65380(13) 0.6366(3) 0.0626(14) Uani 1 1 d . . .
H51A H 0.5888 0.6655 0.6356 0.075 Uiso 1 1 calc R . .
C3 C 0.46211(12) 0.55573(13) 1.1005(4) 0.0712(15) Uani 1 1 d . . .
H3A H 0.4535 0.5344 1.0980 0.085 Uiso 1 1 calc R . .
C50 C 0.55168(12) 0.64946(16) 0.5485(3) 0.0828(19) Uani 1 1 d . . .
H50A H 0.5603 0.6576 0.4880 0.099 Uiso 1 1 calc R . .
C37 C 0.48767(13) 0.51206(13) 0.7492(4) 0.0706(15) Uani 1 1 d . . .
H37A H 0.4687 0.5008 0.7288 0.085 Uiso 1 1 calc R . .
C25 C 0.72638(12) 0.58319(19) 0.8875(4) 0.0798(19) Uani 1 1 d . . .
H25A H 0.7464 0.5779 0.8568 0.096 Uiso 1 1 calc R . .
C24 C 0.71464(11) 0.61398(17) 0.8810(3) 0.0711(16) Uani 1 1 d . . .
H24A H 0.7266 0.6299 0.8458 0.085 Uiso 1 1 calc R . .
F5 F 0.63416(6) 0.53475(6) 1.27408(17) 0.0527(6) Uani 1 1 d . . .
F8 F 0.62775(9) 0.71014(7) 1.4386(2) 0.0904(11) Uani 1 1 d . . .
C19 C 0.63894(11) 0.65651(12) 1.3903(3) 0.0519(12) Uani 1 1 d . . .
C16 C 0.58550(10) 0.65634(9) 1.2706(3) 0.0396(9) Uani 1 1 d . . .
C17 C 0.59293(12) 0.68357(10) 1.3259(3) 0.0510(12) Uani 1 1 d . . .
C18 C 0.62014(13) 0.68368(11) 1.3854(3) 0.0581(13) Uani 1 1 d . . .
C62 C 0.65866(10) 0.70311(11) 0.8374(4) 0.0558(12) Uani 1 1 d . . .
H62A H 0.6664 0.7213 0.8732 0.067 Uiso 1 1 calc R . .
H1 H 0.5399(9) 0.6069(8) 0.917(3) 0.045(11) Uiso 1 1 d . . .
O1 O 0.5330(7) 0.7226(7) 0.5904(18) 0.142(8) Uiso 0.25 1 d P . .
C100 C 0.5311(3) 0.7515(7) 0.6234(14) 0.258(7) Uiso 1 1 d . . .
 
loop_
 _atom_site_aniso_label
 _atom_site_aniso_U_11
 _atom_site_aniso_U_22
 _atom_site_aniso_U_33
 _atom_site_aniso_U_23
 _atom_site_aniso_U_13
 _atom_site_aniso_U_12
C43 0.062(3) 0.067(3) 0.023(2) -0.006(2) 0.011(2) -0.006(2)
C56 0.211(8) 0.075(4) 0.070(5) -0.004(3) -0.006(5) 0.061(5)
C57 0.166(6) 0.075(4) 0.043(3) -0.002(3) -0.009(4) 0.049(4)
C54 0.091(4) 0.060(3) 0.042(3) -0.009(2) 0.018(3) 0.011(3)
C55 0.101(4) 0.060(3) 0.074(4) -0.021(3) -0.001(3) 0.031(3)
Ru1 0.03445(17) 0.03530(17) 0.01499(15) -0.00225(12) -0.00053(12) -0.00601(13)
S1 0.0331(5) 0.0411(5) 0.0190(4) -0.0009(4) 0.0009(4) -0.0014(4)
P2 0.0344(5) 0.0390(5) 0.0184(5) -0.0013(4) 0.0000(4) -0.0047(4)
P1 0.0428(6) 0.0386(5) 0.0175(5) -0.0041(4) 0.0010(4) -0.0071(4)
F1 0.0441(12) 0.0458(13) 0.0270(12) 0.0045(9) 0.0042(9) 0.0049(10)
F2 0.0564(15) 0.0629(15) 0.0341(13) 0.0084(11) 0.0136(11) -0.0111(12)
F10 0.0437(13) 0.0642(15) 0.0256(12) 0.0014(11) -0.0079(10) -0.0055(12)
F3 0.106(2) 0.0449(14) 0.0349(14) 0.0162(11) 0.0046(14) -0.0136(14)
C11 0.049(2) 0.042(2) 0.0180(19) -0.0006(17) -0.0026(17) -0.0115(19)
C46 0.036(2) 0.050(2) 0.021(2) -0.0020(17) -0.0017(16) -0.0011(18)
C9 0.047(2) 0.0302(19) 0.0174(18) -0.0035(15) -0.0056(16) -0.0033(17)
C29 0.053(2) 0.031(2) 0.027(2) -0.0050(16) 0.0003(18) -0.0048(18)
C52 0.043(2) 0.043(2) 0.031(2) -0.0041(18) 0.0033(18) -0.0016(19)
C15 0.041(2) 0.036(2) 0.0160(18) 0.0006(15) 0.0045(15) -0.0096(17)
C28 0.052(2) 0.034(2) 0.027(2) -0.0059(16) 0.0013(18) -0.0049(18)
C8 0.039(2) 0.0233(17) 0.0197(18) -0.0017(14) 0.0060(16) -0.0007(15)
C7 0.038(2) 0.0293(19) 0.0190(18) 0.0030(15) 0.0032(16) -0.0040(16)
C22 0.033(2) 0.068(3) 0.0161(19) -0.0016(18) -0.0008(16) 0.005(2)
C20 0.050(2) 0.043(2) 0.022(2) -0.0020(17) 0.0059(18) -0.012(2)
C27 0.045(2) 0.077(3) 0.033(2) -0.006(2) -0.0002(19) 0.018(2)
C59 0.043(2) 0.059(3) 0.027(2) 0.0005(19) -0.0014(18) -0.003(2)
C10 0.046(2) 0.034(2) 0.0174(19) -0.0023(15) -0.0042(16) -0.0046(18)
C41 0.054(3) 0.061(3) 0.025(2) -0.0062(19) 0.0049(19) -0.001(2)
C48 0.037(2) 0.108(4) 0.032(3) -0.006(2) -0.0034(19) -0.014(2)
C60 0.041(2) 0.082(3) 0.034(2) 0.008(2) 0.0063(19) -0.001(2)
C1 0.035(2) 0.039(2) 0.0211(19) 0.0069(16) -0.0036(15) -0.0057(17)
C40 0.048(2) 0.041(2) 0.0201(19) -0.0070(16) 0.0031(17) -0.0085(18)
C34 0.051(2) 0.045(2) 0.023(2) -0.0059(17) 0.0014(17) -0.0162(19)
B1 0.036(2) 0.033(2) 0.018(2) 0.0022(17) 0.0000(17) -0.0032(18)
C53 0.075(3) 0.045(2) 0.036(2) 0.000(2) 0.017(2) 0.009(2)
C58 0.036(2) 0.046(2) 0.023(2) 0.0074(17) -0.0031(16) -0.0070(18)
C12 0.071(3) 0.039(2) 0.020(2) 0.0049(17) -0.0059(19) -0.016(2)
C42 0.045(2) 0.073(3) 0.038(3) -0.007(2) 0.007(2) -0.001(2)
C45 0.049(2) 0.050(2) 0.024(2) -0.0066(18) 0.0014(18) -0.012(2)
C21 0.038(2) 0.041(2) 0.0190(19) 0.0020(16) -0.0038(16) 0.0010(17)
C61 0.036(2) 0.076(3) 0.056(3) 0.020(3) -0.005(2) -0.016(2)
C30 0.073(3) 0.037(2) 0.033(2) 0.0018(18) 0.003(2) -0.004(2)
C33 0.080(3) 0.051(3) 0.035(3) -0.007(2) 0.019(2) 0.011(2)
C13 0.070(3) 0.032(2) 0.029(2) 0.0028(17) -0.009(2) 0.003(2)
C14 0.049(2) 0.039(2) 0.023(2) 0.0011(17) -0.0026(17) 0.0018(19)
C63 0.046(2) 0.047(2) 0.041(2) -0.004(2) 0.0024(19) -0.013(2)
C47 0.038(2) 0.074(3) 0.027(2) 0.002(2) 0.0036(18) -0.006(2)
F6 0.0670(16) 0.0449(13) 0.0341(13) -0.0061(11) -0.0052(12) 0.0168(12)
F7 0.119(2) 0.0433(15) 0.0580(18) -0.0159(13) 0.0039(16) 0.0112(16)
F9 0.0759(19) 0.094(2) 0.0457(16) -0.0177(14) -0.0164(14) -0.0288(16)
F4 0.100(2) 0.0485(15) 0.0468(16) 0.0168(12) -0.0047(14) 0.0193(15)
C6 0.044(2) 0.053(3) 0.040(3) 0.000(2) 0.0008(19) 0.000(2)
C49 0.048(3) 0.126(5) 0.023(2) 0.000(3) -0.008(2) -0.014(3)
C44 0.064(3) 0.056(3) 0.021(2) -0.0070(18) -0.0001(19) -0.016(2)
C36 0.076(4) 0.077(3) 0.057(3) -0.032(3) 0.010(3) -0.040(3)
C23 0.037(2) 0.092(3) 0.021(2) 0.004(2) 0.0010(17) -0.001(2)
C5 0.036(2) 0.079(3) 0.043(3) 0.003(2) -0.002(2) 0.010(2)
C39 0.047(3) 0.057(3) 0.051(3) -0.015(2) 0.002(2) -0.015(2)
C31 0.085(4) 0.039(2) 0.054(3) 0.001(2) 0.001(3) 0.012(2)
C4 0.036(2) 0.081(4) 0.050(3) 0.006(3) 0.004(2) -0.006(3)
C32 0.096(4) 0.047(3) 0.062(3) -0.007(2) 0.018(3) 0.027(3)
C26 0.063(3) 0.109(5) 0.051(3) -0.009(3) 0.000(3) 0.038(3)
C2 0.047(3) 0.047(3) 0.085(4) 0.003(2) 0.016(3) 0.002(2)
C35 0.058(3) 0.063(3) 0.043(3) -0.019(2) 0.012(2) -0.022(2)
C38 0.051(3) 0.077(3) 0.068(3) -0.016(3) -0.001(2) -0.019(3)
C51 0.046(3) 0.114(4) 0.028(2) 0.015(3) -0.002(2) -0.026(3)
C3 0.057(3) 0.065(3) 0.092(4) 0.000(3) 0.018(3) -0.027(3)
C50 0.058(3) 0.170(6) 0.021(2) 0.016(3) 0.000(2) -0.027(4)
C37 0.064(3) 0.086(4) 0.062(3) -0.022(3) -0.003(3) -0.030(3)
C25 0.045(3) 0.159(6) 0.036(3) -0.002(3) 0.006(2) 0.020(4)
C24 0.044(3) 0.139(5) 0.031(3) 0.016(3) 0.005(2) -0.003(3)
F5 0.0601(15) 0.0556(15) 0.0426(14) 0.0121(11) 0.0042(12) 0.0197(12)
F8 0.138(3) 0.0640(18) 0.069(2) -0.0371(16) -0.0011(19) -0.0335(19)
C19 0.063(3) 0.067(3) 0.025(2) -0.007(2) -0.002(2) -0.022(3)
C16 0.058(3) 0.042(2) 0.019(2) -0.0023(17) 0.0062(18) -0.007(2)
C17 0.087(3) 0.032(2) 0.034(2) -0.0045(18) 0.010(2) -0.004(2)
C18 0.088(4) 0.053(3) 0.034(3) -0.017(2) 0.007(2) -0.025(3)
C62 0.046(3) 0.054(3) 0.066(3) 0.001(2) -0.003(2) -0.016(2)
 
_geom_special_details
;
 All esds (except the esd in the dihedral angle between two l.s. planes)
 are estimated using the full covariance matrix.  The cell esds are taken
 into account individually in the estimation of esds in distances, angles
 and torsion angles; correlations between esds in cell parameters are only
 used when they are defined by crystal symmetry.  An approximate (isotropic)
 treatment of cell esds is used for estimating esds involving l.s. planes.
;
 
loop_
 _geom_bond_atom_site_label_1
 _geom_bond_atom_site_label_2
 _geom_bond_distance
 _geom_bond_site_symmetry_2
 _geom_bond_publ_flag
C43 C42 1.380(6) . ?
C43 C44 1.392(6) . ?
C56 C55 1.375(8) . ?
C56 C57 1.384(7) . ?
C57 C52 1.379(6) . ?
C54 C55 1.354(7) . ?
C54 C53 1.382(6) . ?
Ru1 C7 2.107(3) . ?
Ru1 C8 2.151(3) . ?
Ru1 P1 2.2480(10) . ?
Ru1 P2 2.2938(10) . ?
Ru1 S1 2.5013(9) . ?
S1 C22 1.785(4) . ?
S1 C21 1.806(3) . ?
P2 C58 1.831(4) . ?
P2 C52 1.835(4) . ?
P2 C46 1.837(4) . ?
P1 C40 1.835(4) . ?
P1 C28 1.844(4) . ?
P1 C34 1.853(4) . ?
F1 C10 1.357(4) . ?
F2 C11 1.336(4) . ?
F10 C20 1.359(4) . ?
F3 C12 1.344(4) . ?
C11 C12 1.380(6) . ?
C11 C10 1.382(5) . ?
C46 C51 1.378(5) . ?
C46 C47 1.398(5) . ?
C9 C10 1.388(5) . ?
C9 C14 1.390(5) . ?
C9 B1 1.651(5) . ?
C29 C30 1.385(5) . ?
C29 C28 1.389(5) . ?
C52 C53 1.362(6) . ?
C15 C16 1.387(5) . ?
C15 C20 1.392(5) . ?
C15 B1 1.647(5) . ?
C28 C33 1.395(5) . ?
C8 C7 1.262(5) . ?
C8 B1 1.608(5) . ?
C7 C1 1.459(5) . ?
C22 C23 1.386(6) . ?
C22 C27 1.388(6) . ?
C20 C19 1.371(6) . ?
C27 C26 1.403(6) . ?
C59 C60 1.380(6) . ?
C59 C58 1.390(5) . ?
C41 C42 1.379(6) . ?
C41 C40 1.396(6) . ?
C48 C49 1.372(6) . ?
C48 C47 1.383(6) . ?
C60 C61 1.380(6) . ?
C1 C2 1.373(5) . ?
C1 C6 1.378(5) . ?
C40 C45 1.394(5) . ?
C34 C35 1.386(5) . ?
C34 C39 1.398(6) . ?
B1 C21 1.637(5) . ?
C58 C63 1.395(5) . ?
C12 C13 1.362(6) . ?
C45 C44 1.382(5) . ?
C61 C62 1.387(6) . ?
C30 C31 1.377(6) . ?
C33 C32 1.377(6) . ?
C13 F4 1.352(4) . ?
C13 C14 1.381(5) . ?
C14 F5 1.351(4) . ?
C63 C62 1.378(6) . ?
F6 C16 1.347(5) . ?
F7 C17 1.346(5) . ?
F9 C19 1.349(5) . ?
C6 C5 1.388(6) . ?
C49 C50 1.350(7) . ?
C36 C37 1.351(7) . ?
C36 C35 1.380(6) . ?
C23 C24 1.398(6) . ?
C5 C4 1.345(6) . ?
C39 C38 1.384(6) . ?
C31 C32 1.380(7) . ?
C4 C3 1.354(7) . ?
C26 C25 1.375(8) . ?
C2 C3 1.397(6) . ?
C38 C37 1.390(7) . ?
C51 C50 1.395(6) . ?
C25 C24 1.365(8) . ?
F8 C18 1.344(5) . ?
C19 C18 1.368(7) . ?
C16 C17 1.383(5) . ?
C17 C18 1.380(7) . ?
O1 C100 1.28(3) . ?
O1 C100 1.40(3) 15_566 ?
C100 O1 1.40(3) 12_767 ?
C100 C100 1.821(17) 12_767 ?
C100 C100 1.821(17) 15_566 ?
 
loop_
 _geom_angle_atom_site_label_1
 _geom_angle_atom_site_label_2
 _geom_angle_atom_site_label_3
 _geom_angle
 _geom_angle_site_symmetry_1
 _geom_angle_site_symmetry_3
 _geom_angle_publ_flag
C42 C43 C44 119.0(4) . . ?
C55 C56 C57 119.4(6) . . ?
C52 C57 C56 120.7(5) . . ?
C55 C54 C53 120.5(5) . . ?
C54 C55 C56 119.9(5) . . ?
C7 Ru1 C8 34.45(13) . . ?
C7 Ru1 P1 114.99(10) . . ?
C8 Ru1 P1 123.85(9) . . ?
C7 Ru1 P2 131.94(10) . . ?
C8 Ru1 P2 140.40(9) . . ?
P1 Ru1 P2 95.75(4) . . ?
C7 Ru1 S1 108.49(10) . . ?
C8 Ru1 S1 74.05(10) . . ?
P1 Ru1 S1 103.37(3) . . ?
P2 Ru1 S1 98.27(3) . . ?
C22 S1 C21 101.54(18) . . ?
C22 S1 Ru1 125.60(13) . . ?
C21 S1 Ru1 103.28(12) . . ?
C58 P2 C52 99.40(18) . . ?
C58 P2 C46 103.73(17) . . ?
C52 P2 C46 101.95(18) . . ?
C58 P2 Ru1 119.54(12) . . ?
C52 P2 Ru1 107.09(13) . . ?
C46 P2 Ru1 121.57(13) . . ?
C40 P1 C28 103.55(18) . . ?
C40 P1 C34 103.16(17) . . ?
C28 P1 C34 98.98(18) . . ?
C40 P1 Ru1 121.64(12) . . ?
C28 P1 Ru1 109.60(12) . . ?
C34 P1 Ru1 116.90(13) . . ?
F2 C11 C12 119.5(3) . . ?
F2 C11 C10 122.0(4) . . ?
C12 C11 C10 118.6(4) . . ?
C51 C46 C47 116.9(4) . . ?
C51 C46 P2 124.6(3) . . ?
C47 C46 P2 118.5(3) . . ?
C10 C9 C14 113.4(3) . . ?
C10 C9 B1 120.6(3) . . ?
C14 C9 B1 125.9(3) . . ?
C30 C29 C28 121.1(4) . . ?
C53 C52 C57 118.6(4) . . ?
C53 C52 P2 120.7(3) . . ?
C57 C52 P2 120.1(3) . . ?
C16 C15 C20 113.5(3) . . ?
C16 C15 B1 127.2(3) . . ?
C20 C15 B1 119.4(3) . . ?
C29 C28 C33 118.4(4) . . ?
C29 C28 P1 118.5(3) . . ?
C33 C28 P1 123.0(3) . . ?
C7 C8 B1 159.0(3) . . ?
C7 C8 Ru1 70.8(2) . . ?
B1 C8 Ru1 128.9(2) . . ?
C8 C7 C1 148.6(3) . . ?
C8 C7 Ru1 74.7(2) . . ?
C1 C7 Ru1 136.6(3) . . ?
C23 C22 C27 120.6(4) . . ?
C23 C22 S1 117.0(3) . . ?
C27 C22 S1 122.3(3) . . ?
F10 C20 C19 115.6(4) . . ?
F10 C20 C15 119.5(3) . . ?
C19 C20 C15 124.9(4) . . ?
C22 C27 C26 119.0(5) . . ?
C60 C59 C58 120.5(4) . . ?
F1 C10 C11 116.2(3) . . ?
F1 C10 C9 119.0(3) . . ?
C11 C10 C9 124.8(4) . . ?
C42 C41 C40 121.1(4) . . ?
C49 C48 C47 120.0(4) . . ?
C61 C60 C59 120.4(4) . . ?
C2 C1 C6 117.5(4) . . ?
C2 C1 C7 121.2(4) . . ?
C6 C1 C7 121.2(3) . . ?
C45 C40 C41 118.1(4) . . ?
C45 C40 P1 122.0(3) . . ?
C41 C40 P1 119.6(3) . . ?
C35 C34 C39 117.6(4) . . ?
C35 C34 P1 120.7(3) . . ?
C39 C34 P1 121.4(3) . . ?
C8 B1 C21 104.2(3) . . ?
C8 B1 C15 114.3(3) . . ?
C21 B1 C15 111.5(3) . . ?
C8 B1 C9 109.1(3) . . ?
C21 B1 C9 112.6(3) . . ?
C15 B1 C9 105.3(3) . . ?
C52 C53 C54 120.7(4) . . ?
C59 C58 C63 118.4(4) . . ?
C59 C58 P2 121.6(3) . . ?
C63 C58 P2 119.9(3) . . ?
F3 C12 C13 120.8(4) . . ?
F3 C12 C11 119.7(4) . . ?
C13 C12 C11 119.5(4) . . ?
C41 C42 C43 120.5(4) . . ?
C44 C45 C40 120.6(4) . . ?
B1 C21 S1 105.6(2) . . ?
C60 C61 C62 119.8(4) . . ?
C31 C30 C29 120.1(4) . . ?
C32 C33 C28 119.9(4) . . ?
F4 C13 C12 119.8(4) . . ?
F4 C13 C14 120.3(4) . . ?
C12 C13 C14 119.9(4) . . ?
F5 C14 C13 114.9(3) . . ?
F5 C14 C9 121.2(3) . . ?
C13 C14 C9 123.8(4) . . ?
C62 C63 C58 121.0(4) . . ?
C48 C47 C46 121.8(4) . . ?
C1 C6 C5 120.6(4) . . ?
C50 C49 C48 119.1(4) . . ?
C45 C44 C43 120.7(4) . . ?
C37 C36 C35 121.3(5) . . ?
C22 C23 C24 119.1(5) . . ?
C4 C5 C6 121.2(4) . . ?
C38 C39 C34 121.1(4) . . ?
C30 C31 C32 119.0(4) . . ?
C5 C4 C3 119.4(4) . . ?
C33 C32 C31 121.5(4) . . ?
C25 C26 C27 120.2(5) . . ?
C1 C2 C3 121.0(4) . . ?
C36 C35 C34 120.8(4) . . ?
C39 C38 C37 119.5(5) . . ?
C46 C51 C50 120.5(4) . . ?
C4 C3 C2 120.3(4) . . ?
C49 C50 C51 121.7(4) . . ?
C36 C37 C38 119.7(5) . . ?
C24 C25 C26 120.4(5) . . ?
C25 C24 C23 120.6(5) . . ?
F9 C19 C18 119.9(4) . . ?
F9 C19 C20 120.9(4) . . ?
C18 C19 C20 119.2(4) . . ?
F6 C16 C17 115.5(4) . . ?
F6 C16 C15 120.9(3) . . ?
C17 C16 C15 123.6(4) . . ?
F7 C17 C18 119.8(4) . . ?
F7 C17 C16 120.5(4) . . ?
C18 C17 C16 119.7(4) . . ?
F8 C18 C19 120.7(5) . . ?
F8 C18 C17 120.1(5) . . ?
C19 C18 C17 119.2(4) . . ?
C63 C62 C61 119.7(4) . . ?
C100 O1 C100 85.7(19) . 15_566 ?
O1 C100 O1 177(2) . 12_767 ?
O1 C100 C100 133.0(16) . 12_767 ?
O1 C100 C100 44.5(13) 12_767 12_767 ?
O1 C100 C100 49.9(14) . 15_566 ?
O1 C100 C100 127.5(14) 12_767 15_566 ?
C100 C100 C100 89.96(7) 12_767 15_566 ?
 
_diffrn_measured_fraction_theta_max    1.000
_diffrn_reflns_theta_full              24.99
_diffrn_measured_fraction_theta_full   1.000
_refine_diff_density_max    1.093
_refine_diff_density_min   -0.387
_refine_diff_density_rms    0.061
# SQUEEZE RESULTS (APPEND TO CIF)
# Note: Data are Listed for all Voids in the P1 Unit Cell
# i.e. Centre of Gravity, Solvent Accessible Volume,
# Recovered number of Electrons in the Void and
# Details about the Squeezed Material
loop_
  _platon_squeeze_void_nr
  _platon_squeeze_void_average_x
  _platon_squeeze_void_average_y
  _platon_squeeze_void_average_z
  _platon_squeeze_void_volume
  _platon_squeeze_void_count_electrons
  _platon_squeeze_void_content
   1  0.250  0.500  0.250       514       115 ' '
   2  0.250  1.000  0.747       514       116 ' '
   3  0.750  0.500  0.247       514       116 ' '
   4  0.750  1.000  0.750       514       115 ' '
_platon_squeeze_details
;
;
_iucr_refine_instructions_details
;
TITL fd029 in I4(1)/a
CELL 0.71073  41.3465  41.3465  13.4355  90.000  90.000  90.000
ZERR   16.00   0.0043   0.0043   0.0019   0.000   0.000   0.000
LATT 2
SYMM 0.5-X, -Y, 0.5+Z
SYMM 0.75-Y, 0.25+X, 0.25+Z
SYMM 0.75+Y, 0.75-X, 0.75+Z
SFAC C  H  B  F  P  S  Ru O
UNIT 1024 688 16 160 32 16 16 4
L.S. 12
BOND
FMAP 2
PLAN 10
omit -3 50
omit 0   2   0
 
acta
TEMP -123.130
WGHT    0.050200   48.279900
FVAR       0.22568
C43   1    0.646480    0.576779    0.578290    11.00000    0.06222    0.06653 =
         0.02349   -0.00620    0.01132   -0.00626
AFIX  43
H43A  2    0.660021    0.579651    0.521852    11.00000   -1.20000
AFIX   0
C56   1    0.542761    0.736210    0.879322    11.00000    0.21093    0.07470 =
         0.07005   -0.00402   -0.00590    0.06067
AFIX  43
H56A  2    0.538747    0.754325    0.837614    11.00000   -1.20000
AFIX   0
C57   1    0.551756    0.706835    0.838386    11.00000    0.16603    0.07527 =
         0.04317   -0.00242   -0.00912    0.04914
AFIX  43
H57A  2    0.552651    0.704501    0.768097    11.00000   -1.20000
AFIX   0
C54   1    0.546934    0.713443    1.040052    11.00000    0.09142    0.05982 =
         0.04234   -0.00896    0.01829    0.01132
AFIX  43
H54A  2    0.545493    0.715602    1.110307    11.00000   -1.20000
AFIX   0
C55   1    0.539688    0.738945    0.980862    11.00000    0.10061    0.06041 =
         0.07380   -0.02058   -0.00128    0.03102
AFIX  43
H55A  2    0.532493    0.758689    1.009455    11.00000   -1.20000
AFIX   0
RU1   7    0.575687    0.604815    0.962985    11.00000    0.03445    0.03530 =
         0.01499   -0.00225   -0.00053   -0.00601
S1    6    0.631191    0.610983    1.034561    11.00000    0.03305    0.04106 =
         0.01896   -0.00093    0.00092   -0.00140
P2    5    0.578592    0.644851    0.845134    11.00000    0.03444    0.03895 =
         0.01843   -0.00133   -0.00004   -0.00466
P1    5    0.581201    0.563488    0.855597    11.00000    0.04284    0.03862 =
         0.01755   -0.00411    0.00102   -0.00712
F1    4    0.538420    0.596301    1.318221    11.00000    0.04410    0.04577 =
         0.02700    0.00449    0.00419    0.00492
F2    4    0.519707    0.554437    1.460145    11.00000    0.05642    0.06290 =
         0.03411    0.00842    0.01364   -0.01111
F10   4    0.649855    0.603659    1.345798    11.00000    0.04365    0.06424 =
         0.02561    0.00144   -0.00788   -0.00551
F3    4    0.557594    0.503617    1.509346    11.00000    0.10583    0.04495 =
         0.03494    0.01625    0.00458   -0.01358
C11   1    0.547563    0.549890    1.411777    11.00000    0.04892    0.04222 =
         0.01799   -0.00056   -0.00258   -0.01154
C46   1    0.557722    0.641239    0.724976    11.00000    0.03550    0.05048 =
         0.02119   -0.00205   -0.00166   -0.00111
C9    1    0.586900    0.567735    1.286511    11.00000    0.04693    0.03025 =
         0.01740   -0.00352   -0.00562   -0.00334
C29   1    0.588793    0.522399    1.018479    11.00000    0.05343    0.03095 =
         0.02688   -0.00497    0.00029   -0.00480
AFIX  43
H29A  2    0.574427    0.537045    1.050318    11.00000   -1.20000
AFIX   0
C52   1    0.559432    0.680912    0.898548    11.00000    0.04255    0.04344 =
         0.03104   -0.00409    0.00325   -0.00161
C15   1    0.604211    0.628512    1.270327    11.00000    0.04089    0.03601 =
         0.01597    0.00058    0.00448   -0.00960
C28   1    0.598267    0.528170    0.920895    11.00000    0.05162    0.03351 =
         0.02696   -0.00591    0.00131   -0.00488
C8    1    0.570396    0.598822    1.121213    11.00000    0.03869    0.02328 =
         0.01969   -0.00175    0.00596   -0.00068
C7    1    0.542989    0.596523    1.080504    11.00000    0.03808    0.02933 =
         0.01900    0.00297    0.00324   -0.00403
C22   1    0.667920    0.598673    0.975980    11.00000    0.03294    0.06785 =
         0.01613   -0.00159   -0.00075    0.00484
C20   1    0.630660    0.630067    1.334230    11.00000    0.04951    0.04307 =
         0.02152   -0.00196    0.00587   -0.01217
C27   1    0.679688    0.567309    0.982952    11.00000    0.04502    0.07705 =
         0.03302   -0.00610   -0.00022    0.01779
AFIX  43
H27A  2    0.667778    0.551169    1.017439    11.00000   -1.20000
AFIX   0
C59   1    0.636880    0.648910    0.736782    11.00000    0.04294    0.05906 =
         0.02693    0.00049   -0.00140   -0.00332
AFIX  43
H59A  2    0.629928    0.629851    0.703586    11.00000   -1.20000
AFIX   0
C10   1    0.558039    0.570818    1.338385    11.00000    0.04588    0.03422 =
         0.01742   -0.00234   -0.00421   -0.00459
C41   1    0.640024    0.566030    0.752379    11.00000    0.05390    0.06080 =
         0.02471   -0.00620    0.00492   -0.00056
AFIX  43
H41A  2    0.649520    0.562004    0.815561    11.00000   -1.20000
AFIX   0
C48   1    0.510754    0.621741    0.634445    11.00000    0.03656    0.10757 =
         0.03238   -0.00552   -0.00340   -0.01394
AFIX  43
H48A  2    0.490477    0.610934    0.634692    11.00000   -1.20000
AFIX   0
C60   1    0.665655    0.663357    0.709713    11.00000    0.04061    0.08198 =
         0.03402    0.00750    0.00632   -0.00103
AFIX  43
H60A  2    0.678159    0.654428    0.657139    11.00000   -1.20000
AFIX   0
C1    1    0.508254    0.591269    1.090834    11.00000    0.03535    0.03935 =
         0.02106    0.00688   -0.00359   -0.00566
C40   1    0.606401    0.566937    0.743643    11.00000    0.04775    0.04058 =
         0.02007   -0.00698    0.00309   -0.00847
C34   1    0.543499    0.544824    0.808086    11.00000    0.05129    0.04483 =
         0.02325   -0.00594    0.00142   -0.01621
B1    3    0.598001    0.595425    1.204844    11.00000    0.03610    0.03327 =
         0.01804    0.00223   -0.00001   -0.00317
C53   1    0.556410    0.684301    0.998984    11.00000    0.07493    0.04498 =
         0.03590    0.00032    0.01666    0.00913
AFIX  43
H53A  2    0.560867    0.666431    1.041260    11.00000   -1.20000
AFIX   0
C58   1    0.617995    0.662027    0.812226    11.00000    0.03557    0.04637 =
         0.02341    0.00738   -0.00311   -0.00703
C12   1    0.566948    0.523954    1.436774    11.00000    0.07109    0.03889 =
         0.01981    0.00487   -0.00589   -0.01598
C42   1    0.659698    0.570881    0.670831    11.00000    0.04492    0.07348 =
         0.03814   -0.00748    0.00712   -0.00101
AFIX  43
H42A  2    0.682530    0.570156    0.678435    11.00000   -1.20000
AFIX   0
C45   1    0.593181    0.573206    0.650171    11.00000    0.04857    0.04971 =
         0.02395   -0.00659    0.00144   -0.01158
AFIX  43
H45A  2    0.570359    0.573874    0.642255    11.00000   -1.20000
AFIX   0
C21   1    0.630342    0.584914    1.142377    11.00000    0.03783    0.04124 =
         0.01901    0.00202   -0.00380    0.00096
AFIX  23
H21A  2    0.629051    0.561938    1.122025    11.00000   -1.20000
H21B  2    0.650016    0.588006    1.183280    11.00000   -1.20000
AFIX   0
C61   1    0.676377    0.690686    0.758531    11.00000    0.03590    0.07620 =
         0.05553    0.01986   -0.00455   -0.01616
AFIX  43
H61A  2    0.695837    0.700959    0.738187    11.00000   -1.20000
AFIX   0
C30   1    0.599949    0.495645    1.070114    11.00000    0.07317    0.03706 =
         0.03341    0.00179    0.00334   -0.00370
AFIX  43
H30A  2    0.593327    0.492153    1.136963    11.00000   -1.20000
AFIX   0
C33   1    0.618529    0.505756    0.874695    11.00000    0.08033    0.05094 =
         0.03465   -0.00706    0.01867    0.01121
AFIX  43
H33A  2    0.624921    0.508848    0.807447    11.00000   -1.20000
AFIX   0
C13   1    0.595391    0.519316    1.387696    11.00000    0.06952    0.03247 =
         0.02909    0.00276   -0.00909    0.00291
C14   1    0.604996    0.540987    1.315232    11.00000    0.04911    0.03936 =
         0.02333    0.00107   -0.00262    0.00181
C63   1    0.629726    0.688900    0.863551    11.00000    0.04593    0.04734 =
         0.04098   -0.00404    0.00242   -0.01315
AFIX  43
H63A  2    0.617588    0.697543    0.917373    11.00000   -1.20000
AFIX   0
C47   1    0.527999    0.625171    0.722002    11.00000    0.03823    0.07378 =
         0.02677    0.00211    0.00355   -0.00563
AFIX  43
H47A  2    0.519412    0.616370    0.781732    11.00000   -1.20000
AFIX   0
F6    4    0.558190    0.658228    1.216193    11.00000    0.06698    0.04494 =
         0.03411   -0.00606   -0.00519    0.01684
F7    4    0.574025    0.710035    1.321214    11.00000    0.11884    0.04331 =
         0.05798   -0.01590    0.00395    0.01118
F9    4    0.665243    0.656031    1.449593    11.00000    0.07587    0.09373 =
         0.04568   -0.01773   -0.01636   -0.02876
F4    4    0.614479    0.493966    1.411948    11.00000    0.10005    0.04851 =
         0.04684    0.01676   -0.00474    0.01929
C6    1    0.487433    0.616624    1.108828    11.00000    0.04392    0.05321 =
         0.04034   -0.00048    0.00082   -0.00014
AFIX  43
H6A   2    0.495649    0.638048    1.112539    11.00000   -1.20000
AFIX   0
C49   1    0.522949    0.633956    0.547193    11.00000    0.04799    0.12622 =
         0.02267   -0.00019   -0.00837   -0.01433
AFIX  43
H49A  2    0.511322    0.631535    0.486663    11.00000   -1.20000
AFIX   0
C44   1    0.612989    0.578456    0.568936    11.00000    0.06360    0.05558 =
         0.02127   -0.00697   -0.00007   -0.01645
AFIX  43
H44A  2    0.603655    0.583260    0.506038    11.00000   -1.20000
AFIX   0
C36   1    0.516832    0.503624    0.711974    11.00000    0.07589    0.07686 =
         0.05699   -0.03194    0.00995   -0.03982
AFIX  43
H36A  2    0.518201    0.486401    0.665361    11.00000   -1.20000
AFIX   0
C23   1    0.685219    0.622234    0.925469    11.00000    0.03691    0.09210 =
         0.02061    0.00398    0.00097   -0.00150
AFIX  43
H23A  2    0.677184    0.643715    0.921157    11.00000   -1.20000
AFIX   0
C5    1    0.454571    0.611162    1.121585    11.00000    0.03634    0.07852 =
         0.04309    0.00327   -0.00213    0.00991
AFIX  43
H5A   2    0.440635    0.628924    1.134722    11.00000   -1.20000
AFIX   0
C39   1    0.513252    0.553378    0.846350    11.00000    0.04738    0.05672 =
         0.05104   -0.01451    0.00184   -0.01472
AFIX  43
H39A  2    0.511727    0.570568    0.893032    11.00000   -1.20000
AFIX   0
C31   1    0.620622    0.474093    1.024749    11.00000    0.08490    0.03853 =
         0.05402    0.00124    0.00124    0.01204
AFIX  43
H31A  2    0.628823    0.456020    1.060377    11.00000   -1.20000
AFIX   0
C4    1    0.442097    0.581183    1.115685    11.00000    0.03645    0.08092 =
         0.05019    0.00586    0.00404   -0.00601
AFIX  43
H4A   2    0.419454    0.577891    1.122122    11.00000   -1.20000
AFIX   0
C32   1    0.629249    0.479145    0.926727    11.00000    0.09577    0.04673 =
         0.06166   -0.00671    0.01792    0.02708
AFIX  43
H32A  2    0.642889    0.463920    0.894440    11.00000   -1.20000
AFIX   0
C26   1    0.709439    0.559799    0.938300    11.00000    0.06296    0.10913 =
         0.05088   -0.00878   -0.00005    0.03850
AFIX  43
H26A  2    0.717904    0.538498    0.943175    11.00000   -1.20000
AFIX   0
C2    1    0.495315    0.560687    1.088444    11.00000    0.04724    0.04742 =
         0.08510    0.00254    0.01599    0.00236
AFIX  43
H2A   2    0.509145    0.542628    1.078455    11.00000   -1.20000
AFIX   0
C35   1    0.544674    0.519549    0.740412    11.00000    0.05824    0.06332 =
         0.04264   -0.01887    0.01172   -0.02171
AFIX  43
H35A  2    0.564890    0.513109    0.713275    11.00000   -1.20000
AFIX   0
C38   1    0.485492    0.537234    0.817391    11.00000    0.05121    0.07722 =
         0.06778   -0.01603   -0.00138   -0.01895
AFIX  43
H38A  2    0.465086    0.543315    0.843960    11.00000   -1.20000
AFIX   0
C51   1    0.569039    0.653802    0.636570    11.00000    0.04574    0.11415 =
         0.02793    0.01479   -0.00171   -0.02642
AFIX  43
H51A  2    0.588807    0.665508    0.635578    11.00000   -1.20000
AFIX   0
C3    1    0.462111    0.555732    1.100485    11.00000    0.05661    0.06496 =
         0.09206    0.00042    0.01820   -0.02738
AFIX  43
H3A   2    0.453546    0.534427    1.097996    11.00000   -1.20000
AFIX   0
C50   1    0.551680    0.649457    0.548504    11.00000    0.05816    0.16965 =
         0.02053    0.01596    0.00045   -0.02677
AFIX  43
H50A  2    0.560299    0.657612    0.487954    11.00000   -1.20000
AFIX   0
C37   1    0.487666    0.512058    0.749155    11.00000    0.06387    0.08564 =
         0.06243   -0.02234   -0.00321   -0.02955
AFIX  43
H37A  2    0.468741    0.500840    0.728767    11.00000   -1.20000
AFIX   0
C25   1    0.726378    0.583193    0.887498    11.00000    0.04466    0.15924 =
         0.03562   -0.00239    0.00636    0.02018
AFIX  43
H25A  2    0.746378    0.577891    0.856756    11.00000   -1.20000
AFIX   0
C24   1    0.714638    0.613981    0.880960    11.00000    0.04367    0.13899 =
         0.03063    0.01579    0.00498   -0.00344
AFIX  43
H24A  2    0.726579    0.629949    0.845823    11.00000   -1.20000
AFIX   0
F5    4    0.634157    0.534748    1.274078    11.00000    0.06005    0.05562 =
         0.04258    0.01209    0.00425    0.01971
F8    4    0.627751    0.710141    1.438601    11.00000    0.13833    0.06402 =
         0.06880   -0.03712   -0.00108   -0.03348
C19   1    0.638936    0.656509    1.390272    11.00000    0.06308    0.06700 =
         0.02549   -0.00708   -0.00243   -0.02224
C16   1    0.585495    0.656344    1.270619    11.00000    0.05815    0.04185 =
         0.01876   -0.00230    0.00622   -0.00669
C17   1    0.592927    0.683566    1.325940    11.00000    0.08733    0.03199 =
         0.03371   -0.00449    0.01046   -0.00395
C18   1    0.620143    0.683685    1.385439    11.00000    0.08785    0.05280 =
         0.03363   -0.01724    0.00717   -0.02548
C62   1    0.658660    0.703112    0.837384    11.00000    0.04648    0.05432 =
         0.06649    0.00053   -0.00315   -0.01567
AFIX  43
H62A  2    0.666428    0.721335    0.873207    11.00000   -1.20000
AFIX   0
H1    2    0.539892    0.606932    0.916581    11.00000    0.04463
O1    8    0.532969    0.722572    0.590417    10.25000    0.14226
C100  1    0.531094    0.751530    0.623367    11.00000    0.25769
 
HKLF 4
 
REM  fd029 in I4(1)/a
REM R1 =  0.0497 for   8084 Fo > 4sig(Fo)  and  0.0716 for all  10113 data
REM    715 parameters refined using      0 restraints
 
END
 
WGHT      0.0496     49.0422
REM Highest difference peak  1.093,  deepest hole -0.387,  1-sigma level  0.061
Q1    1   0.5981  0.6000  0.9494  11.00000  0.05    1.09
Q2    1   0.6009  0.5595  0.8367  11.00000  0.05    0.49
Q3    1   0.5240  0.7215  0.9075  11.00000  0.05    0.40
Q4    1   0.5289  0.5614  0.7630  11.00000  0.05    0.38
Q5    1   0.4983  0.5612  1.0001  11.00000  0.05    0.34
Q6    1   0.6397  0.6300  1.0536  11.00000  0.05    0.33
Q7    1   0.5711  0.5796  0.9302  11.00000  0.05    0.32
Q8    1   0.5825  0.6302  0.9540  11.00000  0.05    0.29
Q9    1   0.5999  0.6502  0.8293  11.00000  0.05    0.29
Q10   1   0.5021  0.5426  0.7144  11.00000  0.05    0.29
;
#===end
 
data_fd031_0m 
 
_audit_creation_method            SHELXL-97 
_chemical_name_systematic 
; 
 ? 
; 
_chemical_name_common             ? 
_chemical_melting_point           ? 
_chemical_formula_moiety          ? 
_chemical_formula_sum 
 'C63 H46 B F10 P2 Ru S' 
_chemical_formula_weight          1198.88 
 
loop_ 
 _atom_type_symbol 
 _atom_type_description 
 _atom_type_scat_dispersion_real 
 _atom_type_scat_dispersion_imag 
 _atom_type_scat_source 
 'C'  'C'   0.0033   0.0016 
 'International Tables Vol C Tables 4.2.6.8 and 6.1.1.4' 
 'H'  'H'   0.0000   0.0000 
 'International Tables Vol C Tables 4.2.6.8 and 6.1.1.4' 
 'B'  'B'   0.0013   0.0007 
 'International Tables Vol C Tables 4.2.6.8 and 6.1.1.4' 
 'F'  'F'   0.0171   0.0103 
 'International Tables Vol C Tables 4.2.6.8 and 6.1.1.4' 
 'P'  'P'   0.1023   0.0942 
 'International Tables Vol C Tables 4.2.6.8 and 6.1.1.4' 
 'S'  'S'   0.1246   0.1234 
 'International Tables Vol C Tables 4.2.6.8 and 6.1.1.4' 
 'Ru'  'Ru'  -1.2594   0.8363 
 'International Tables Vol C Tables 4.2.6.8 and 6.1.1.4' 
 
_symmetry_cell_setting            monoclinic 
_symmetry_space_group_name_H-M    P2(1)/c 
 
loop_ 
 _symmetry_equiv_pos_as_xyz 
 'x, y, z' 
 '-x, y+1/2, -z+1/2' 
 '-x, -y, -z' 
 'x, -y-1/2, z-1/2' 
 
_cell_length_a                    15.7292(16) 
_cell_length_b                    17.8914(15) 
_cell_length_c                    19.3892(19) 
_cell_angle_alpha                 90.00 
_cell_angle_beta                  95.229(3) 
_cell_angle_gamma                 90.00 
_cell_volume                      5433.8(9) 
_cell_formula_units_Z             4 
_cell_measurement_temperature     150(2) 
_cell_measurement_reflns_used     ? 
_cell_measurement_theta_min       ? 
_cell_measurement_theta_max       ? 
 
_exptl_crystal_description        ? 
_exptl_crystal_colour             ? 
_exptl_crystal_size_max           0.13 
_exptl_crystal_size_mid           0.08 
_exptl_crystal_size_min           0.08 
_exptl_crystal_density_meas       ? 
_exptl_crystal_density_diffrn     1.465 
_exptl_crystal_density_method     'not measured' 
_exptl_crystal_F_000              2436 
_exptl_absorpt_coefficient_mu     0.461 
_exptl_absorpt_correction_type    multi-scan
_exptl_absorpt_correction_T_min   0.9425 
_exptl_absorpt_correction_T_max   0.9640 
_exptl_absorpt_process_details    ? 
 
_exptl_special_details 
; 
 ? 
; 
 
_diffrn_ambient_temperature       150(2) 
_diffrn_radiation_wavelength      0.71073 
_diffrn_radiation_type            MoK\a 
_diffrn_radiation_source          'fine-focus sealed tube' 
_diffrn_radiation_monochromator   graphite 
_diffrn_measurement_device_type   ? 
_diffrn_measurement_method        ? 
_diffrn_detector_area_resol_mean  ? 
_diffrn_standards_number          ? 
_diffrn_standards_interval_count  ? 
_diffrn_standards_interval_time   ? 
_diffrn_standards_decay_%         ? 
_diffrn_reflns_number             49249 
_diffrn_reflns_av_R_equivalents   0.1127 
_diffrn_reflns_av_sigmaI/netI     0.1165 
_diffrn_reflns_limit_h_min        -20 
_diffrn_reflns_limit_h_max        19 
_diffrn_reflns_limit_k_min        -21 
_diffrn_reflns_limit_k_max        23 
_diffrn_reflns_limit_l_min        -25 
_diffrn_reflns_limit_l_max        25 
_diffrn_reflns_theta_min          1.55 
_diffrn_reflns_theta_max          27.51 
_reflns_number_total              12475 
_reflns_number_gt                 7400 
_reflns_threshold_expression      >2sigma(I) 
 
_computing_data_collection        ? 
_computing_cell_refinement        ? 
_computing_data_reduction         ? 
_computing_structure_solution     'SHELXS-97 (Sheldrick, 1990)' 
_computing_structure_refinement   'SHELXL-97 (Sheldrick, 1997)' 
_computing_molecular_graphics     ? 
_computing_publication_material   ? 
 
_refine_special_details 
; 
 Refinement of F^2^ against ALL reflections.  The weighted R-factor wR and 
 goodness of fit S are based on F^2^, conventional R-factors R are based 
 on F, with F set to zero for negative F^2^. The threshold expression of 
 F^2^ > 2sigma(F^2^) is used only for calculating R-factors(gt) etc. and is 
 not relevant to the choice of reflections for refinement.  R-factors based 
 on F^2^ are statistically about twice as large as those based on F, and R- 
 factors based on ALL data will be even larger. 
; 
 
_refine_ls_structure_factor_coef  Fsqd  
_refine_ls_matrix_type            full 
_refine_ls_weighting_scheme       calc  
_refine_ls_weighting_details 
 'calc w=1/[\s^2^(Fo^2^)+(0.0455P)^2^+0.0000P] where P=(Fo^2^+2Fc^2^)/3' 
_atom_sites_solution_primary      direct 
_atom_sites_solution_secondary    difmap 
_atom_sites_solution_hydrogens    geom 
_refine_ls_hydrogen_treatment     mixed 
_refine_ls_extinction_method      none 
_refine_ls_extinction_coef        ? 
_refine_ls_number_reflns          12475 
_refine_ls_number_parameters      703 
_refine_ls_number_restraints      0 
_refine_ls_R_factor_all           0.1142 
_refine_ls_R_factor_gt            0.0519 
_refine_ls_wR_factor_ref          0.1213 
_refine_ls_wR_factor_gt           0.0990 
_refine_ls_goodness_of_fit_ref    0.978 
_refine_ls_restrained_S_all       0.978 
_refine_ls_shift/su_max           0.001 
_refine_ls_shift/su_mean          0.000 
 
loop_ 
 _atom_site_label 
 _atom_site_type_symbol 
 _atom_site_fract_x 
 _atom_site_fract_y 
 _atom_site_fract_z 
 _atom_site_U_iso_or_equiv 
 _atom_site_adp_type 
 _atom_site_occupancy 
 _atom_site_symmetry_multiplicity 
 _atom_site_calc_flag 
 _atom_site_refinement_flags 
 _atom_site_disorder_assembly 
 _atom_site_disorder_group 
Ru1 Ru 0.67544(2) 0.790864(16) 0.773061(17) 0.01765(9) Uani 1 1 d . . . 
P1 P 0.77923(6) 0.87419(5) 0.81663(6) 0.0197(2) Uani 1 1 d . . . 
P2 P 0.72852(7) 0.77273(5) 0.66723(5) 0.0195(2) Uani 1 1 d . . . 
S1 S 0.45549(7) 0.83767(5) 0.81186(6) 0.0252(2) Uani 1 1 d . . . 
B1 B 0.3316(3) 0.8902(2) 0.7081(2) 0.0225(11) Uani 1 1 d . . . 
F1 F 0.36161(17) 0.77873(13) 0.59196(14) 0.0453(7) Uani 1 1 d . . . 
F2 F 0.26328(19) 0.76081(15) 0.47564(14) 0.0553(8) Uani 1 1 d . . . 
F3 F 0.12211(18) 0.84799(17) 0.44672(15) 0.0597(9) Uani 1 1 d . . . 
F4 F 0.07973(17) 0.95071(17) 0.54067(15) 0.0601(9) Uani 1 1 d . . . 
F5 F 0.17722(15) 0.97055(14) 0.65889(13) 0.0384(6) Uani 1 1 d . . . 
F6 F 0.21996(16) 0.76540(12) 0.73379(13) 0.0377(6) Uani 1 1 d . . . 
F7 F 0.11580(18) 0.75097(15) 0.83258(15) 0.0520(8) Uani 1 1 d . . . 
F8 F 0.09923(19) 0.86317(17) 0.92600(15) 0.0599(9) Uani 1 1 d . . . 
F9 F 0.18870(19) 0.99162(16) 0.91496(16) 0.0586(9) Uani 1 1 d . . . 
F10 F 0.29471(17) 1.00818(13) 0.81718(14) 0.0455(7) Uani 1 1 d . . . 
C1 C 0.5540(2) 0.7209(2) 0.7636(2) 0.0215(9) Uani 1 1 d . . . 
H1A H 0.5163 0.7212 0.7192 0.026 Uiso 1 1 calc R . . 
C2 C 0.6250(2) 0.6720(2) 0.7713(2) 0.0226(9) Uani 1 1 d . . . 
H2A H 0.6364 0.6386 0.7319 0.027 Uiso 1 1 calc R . . 
C3 C 0.6853(3) 0.6760(2) 0.8290(2) 0.0252(9) Uani 1 1 d . . . 
H3A H 0.7391 0.6461 0.8304 0.030 Uiso 1 1 calc R . . 
C4 C 0.6761(2) 0.7327(2) 0.8777(2) 0.0229(9) Uani 1 1 d . . . 
H4A H 0.7242 0.7427 0.9139 0.027 Uiso 1 1 calc R . . 
C5 C 0.6069(2) 0.7829(2) 0.8705(2) 0.0230(9) Uani 1 1 d . . . 
H5A H 0.6064 0.8271 0.9021 0.028 Uiso 1 1 calc R . . 
C6 C 0.5430(3) 0.77621(19) 0.8145(2) 0.0219(9) Uani 1 1 d . . . 
C7 C 0.4024(2) 0.8229(2) 0.7261(2) 0.0228(9) Uani 1 1 d . . . 
H7A H 0.4450 0.8230 0.6915 0.027 Uiso 1 1 calc R . . 
H7B H 0.3734 0.7737 0.7241 0.027 Uiso 1 1 calc R . . 
C8 C 0.3817(2) 0.9702(2) 0.7011(2) 0.0238(9) Uani 1 1 d . . . 
H8A H 0.3389 1.0103 0.6913 0.029 Uiso 1 1 calc R . . 
H8B H 0.4142 0.9818 0.7460 0.029 Uiso 1 1 calc R . . 
C9 C 0.4436(3) 0.9701(2) 0.6438(2) 0.0275(10) Uani 1 1 d . . . 
H9A H 0.4792 0.9244 0.6489 0.033 Uiso 1 1 calc R . . 
H9B H 0.4096 0.9673 0.5983 0.033 Uiso 1 1 calc R . . 
C10 C 0.5024(2) 1.0377(2) 0.6438(2) 0.0215(9) Uani 1 1 d . . . 
C11 C 0.5655(3) 1.0474(2) 0.6979(2) 0.0288(10) Uani 1 1 d . . . 
H11A H 0.5690 1.0133 0.7356 0.035 Uiso 1 1 calc R . . 
C12 C 0.6236(3) 1.1057(2) 0.6981(3) 0.0348(11) Uani 1 1 d . . . 
H12A H 0.6663 1.1114 0.7356 0.042 Uiso 1 1 calc R . . 
C13 C 0.6189(3) 1.1555(2) 0.6434(3) 0.0358(12) Uani 1 1 d . . . 
H13A H 0.6592 1.1950 0.6425 0.043 Uiso 1 1 calc R . . 
C14 C 0.5560(3) 1.1476(2) 0.5906(2) 0.0342(11) Uani 1 1 d . . . 
H14A H 0.5520 1.1828 0.5538 0.041 Uiso 1 1 calc R . . 
C15 C 0.4977(3) 1.0891(2) 0.5896(2) 0.0294(10) Uani 1 1 d . . . 
H15A H 0.4548 1.0843 0.5521 0.035 Uiso 1 1 calc R . . 
C16 C 0.2734(2) 0.8736(2) 0.6341(2) 0.0234(9) Uani 1 1 d . . . 
C17 C 0.2913(3) 0.8232(2) 0.5828(2) 0.0313(10) Uani 1 1 d . . . 
C18 C 0.2415(3) 0.8126(3) 0.5218(2) 0.0381(12) Uani 1 1 d . . . 
C19 C 0.1697(3) 0.8553(3) 0.5074(2) 0.0416(13) Uani 1 1 d . . . 
C20 C 0.1486(3) 0.9071(3) 0.5553(3) 0.0386(12) Uani 1 1 d . . . 
C21 C 0.2006(3) 0.9155(2) 0.6158(2) 0.0319(11) Uani 1 1 d . . . 
C22 C 0.2645(2) 0.8871(2) 0.7695(2) 0.0227(9) Uani 1 1 d . . . 
C23 C 0.2159(3) 0.8239(2) 0.7781(2) 0.0273(10) Uani 1 1 d . . . 
C24 C 0.1613(3) 0.8141(2) 0.8286(2) 0.0348(11) Uani 1 1 d . . . 
C25 C 0.1522(3) 0.8704(3) 0.8755(3) 0.0398(12) Uani 1 1 d . . . 
C26 C 0.1986(3) 0.9346(2) 0.8697(2) 0.0372(12) Uani 1 1 d . . . 
C27 C 0.2521(3) 0.9417(2) 0.8184(2) 0.0294(10) Uani 1 1 d . . . 
C28 C 0.8497(2) 0.8306(2) 0.8854(2) 0.0209(9) Uani 1 1 d . . . 
C29 C 0.8902(2) 0.7641(2) 0.8697(2) 0.0267(10) Uani 1 1 d . . . 
H29A H 0.8804 0.7436 0.8245 0.032 Uiso 1 1 calc R . . 
C30 C 0.9442(3) 0.7277(2) 0.9187(2) 0.0283(10) Uani 1 1 d . . . 
H30A H 0.9713 0.6825 0.9072 0.034 Uiso 1 1 calc R . . 
C31 C 0.9589(3) 0.7571(2) 0.9848(2) 0.0332(11) Uani 1 1 d . . . 
H31A H 0.9970 0.7325 1.0182 0.040 Uiso 1 1 calc R . . 
C32 C 0.9185(3) 0.8218(2) 1.0021(2) 0.0308(10) Uani 1 1 d . . . 
H32A H 0.9274 0.8411 1.0479 0.037 Uiso 1 1 calc R . . 
C33 C 0.8647(3) 0.8591(2) 0.9524(2) 0.0277(10) Uani 1 1 d . . . 
H33A H 0.8379 0.9043 0.9643 0.033 Uiso 1 1 calc R . . 
C34 C 0.8548(3) 0.9186(2) 0.7628(2) 0.0206(9) Uani 1 1 d . . . 
C35 C 0.9418(3) 0.9036(2) 0.7688(2) 0.0281(10) Uani 1 1 d . . . 
H35A H 0.9652 0.8692 0.8026 0.034 Uiso 1 1 calc R . . 
C36 C 0.9950(3) 0.9390(2) 0.7251(2) 0.0331(11) Uani 1 1 d . . . 
H36A H 1.0544 0.9285 0.7294 0.040 Uiso 1 1 calc R . . 
C37 C 0.9621(3) 0.9887(2) 0.6763(2) 0.0368(12) Uani 1 1 d . . . 
H37A H 0.9984 1.0118 0.6460 0.044 Uiso 1 1 calc R . . 
C38 C 0.8755(3) 1.0056(2) 0.6709(2) 0.0391(12) Uani 1 1 d . . . 
H38A H 0.8527 1.0408 0.6375 0.047 Uiso 1 1 calc R . . 
C39 C 0.8227(3) 0.9706(2) 0.7143(2) 0.0282(10) Uani 1 1 d . . . 
H39A H 0.7636 0.9825 0.7109 0.034 Uiso 1 1 calc R . . 
C40 C 0.7386(3) 0.9592(2) 0.8560(2) 0.0246(9) Uani 1 1 d . . . 
C41 C 0.7965(3) 1.0141(2) 0.8812(2) 0.0346(11) Uani 1 1 d . . . 
H41A H 0.8558 1.0068 0.8780 0.042 Uiso 1 1 calc R . . 
C42 C 0.7685(3) 1.0786(2) 0.9106(3) 0.0468(14) Uani 1 1 d . . . 
H42A H 0.8084 1.1154 0.9281 0.056 Uiso 1 1 calc R . . 
C43 C 0.6816(3) 1.0895(2) 0.9145(3) 0.0447(13) Uani 1 1 d . . . 
H43A H 0.6620 1.1338 0.9349 0.054 Uiso 1 1 calc R . . 
C44 C 0.6241(3) 1.0364(2) 0.8890(2) 0.0379(12) Uani 1 1 d . . . 
H44A H 0.5647 1.0446 0.8914 0.045 Uiso 1 1 calc R . . 
C45 C 0.6517(3) 0.9711(2) 0.8599(2) 0.0269(10) Uani 1 1 d . . . 
H45A H 0.6114 0.9345 0.8427 0.032 Uiso 1 1 calc R . . 
C46 C 0.7325(2) 0.8482(2) 0.6041(2) 0.0193(9) Uani 1 1 d . . . 
C47 C 0.6780(3) 0.9091(2) 0.6064(2) 0.0233(9) Uani 1 1 d . . . 
H47A H 0.6426 0.9136 0.6433 0.028 Uiso 1 1 calc R . . 
C48 C 0.6750(3) 0.9640(2) 0.5546(2) 0.0279(10) Uani 1 1 d . . . 
H48A H 0.6379 1.0056 0.5565 0.034 Uiso 1 1 calc R . . 
C49 C 0.7261(3) 0.9571(2) 0.5011(2) 0.0294(10) Uani 1 1 d . . . 
H49A H 0.7246 0.9944 0.4662 0.035 Uiso 1 1 calc R . . 
C50 C 0.7793(3) 0.8965(2) 0.4977(2) 0.0296(10) Uani 1 1 d . . . 
H50A H 0.8142 0.8921 0.4604 0.035 Uiso 1 1 calc R . . 
C51 C 0.7822(2) 0.8417(2) 0.5485(2) 0.0219(9) Uani 1 1 d . . . 
H51A H 0.8183 0.7995 0.5453 0.026 Uiso 1 1 calc R . . 
C52 C 0.8356(3) 0.7312(2) 0.6762(2) 0.0241(9) Uani 1 1 d . . . 
C53 C 0.9093(3) 0.7696(2) 0.6649(2) 0.0271(10) Uani 1 1 d . . . 
H53A H 0.9053 0.8189 0.6466 0.033 Uiso 1 1 calc R . . 
C54 C 0.9891(3) 0.7373(3) 0.6797(2) 0.0413(12) Uani 1 1 d . . . 
H54A H 1.0392 0.7647 0.6725 0.050 Uiso 1 1 calc R . . 
C55 C 0.9956(3) 0.6653(3) 0.7051(3) 0.0543(16) Uani 1 1 d . . . 
H55A H 1.0501 0.6431 0.7150 0.065 Uiso 1 1 calc R . . 
C56 C 0.9227(3) 0.6254(3) 0.7160(3) 0.0464(14) Uani 1 1 d . . . 
H56A H 0.9272 0.5755 0.7326 0.056 Uiso 1 1 calc R . . 
C57 C 0.8440(3) 0.6578(2) 0.7028(2) 0.0343(11) Uani 1 1 d . . . 
H57A H 0.7943 0.6305 0.7117 0.041 Uiso 1 1 calc R . . 
C58 C 0.6637(2) 0.7083(2) 0.60998(19) 0.0208(8) Uani 1 1 d . . . 
C59 C 0.6950(3) 0.6440(2) 0.5809(2) 0.0269(10) Uani 1 1 d . . . 
H59A H 0.7532 0.6305 0.5911 0.032 Uiso 1 1 calc R . . 
C60 C 0.6419(3) 0.5993(2) 0.5373(2) 0.0316(11) Uani 1 1 d . . . 
H60A H 0.6638 0.5551 0.5184 0.038 Uiso 1 1 calc R . . 
C61 C 0.5575(3) 0.6186(2) 0.5210(2) 0.0320(11) Uani 1 1 d . . . 
H61A H 0.5213 0.5878 0.4912 0.038 Uiso 1 1 calc R . . 
C62 C 0.5263(3) 0.6832(2) 0.5486(2) 0.0309(10) Uani 1 1 d . . . 
H62A H 0.4685 0.6972 0.5371 0.037 Uiso 1 1 calc R . . 
C63 C 0.5783(3) 0.7275(2) 0.5925(2) 0.0255(10) Uani 1 1 d . . . 
H63A H 0.5558 0.7716 0.6112 0.031 Uiso 1 1 calc R . . 
 
loop_ 
 _atom_site_aniso_label 
 _atom_site_aniso_U_11 
 _atom_site_aniso_U_22 
 _atom_site_aniso_U_33 
 _atom_site_aniso_U_23 
 _atom_site_aniso_U_13 
 _atom_site_aniso_U_12 
Ru1 0.01817(16) 0.01630(15) 0.01841(17) 0.00235(15) 0.00122(12) 0.00111(14) 
P1 0.0201(5) 0.0178(5) 0.0213(6) 0.0002(4) 0.0018(4) 0.0015(4) 
P2 0.0212(5) 0.0174(5) 0.0197(6) 0.0005(4) 0.0011(4) 0.0032(4) 
S1 0.0229(6) 0.0253(5) 0.0275(6) 0.0022(5) 0.0028(5) 0.0040(4) 
B1 0.021(3) 0.020(2) 0.027(3) 0.006(2) 0.004(2) -0.0004(19) 
F1 0.0530(18) 0.0387(15) 0.0428(17) -0.0126(13) -0.0042(14) 0.0134(13) 
F2 0.069(2) 0.0574(18) 0.0388(18) -0.0165(15) -0.0008(15) -0.0178(15) 
F3 0.0468(18) 0.089(2) 0.0398(18) 0.0076(16) -0.0139(15) -0.0305(16) 
F4 0.0260(15) 0.100(2) 0.052(2) 0.0212(18) -0.0076(14) 0.0110(16) 
F5 0.0271(14) 0.0480(15) 0.0404(17) 0.0092(13) 0.0041(12) 0.0126(12) 
F6 0.0422(16) 0.0279(13) 0.0439(17) -0.0018(12) 0.0088(13) -0.0134(11) 
F7 0.0537(19) 0.0539(17) 0.0497(19) 0.0069(14) 0.0112(15) -0.0344(15) 
F8 0.061(2) 0.084(2) 0.0395(18) -0.0019(16) 0.0259(16) -0.0317(17) 
F9 0.070(2) 0.0582(18) 0.054(2) -0.0163(16) 0.0364(17) -0.0226(16) 
F10 0.0588(19) 0.0305(14) 0.0523(18) -0.0120(13) 0.0324(15) -0.0177(13) 
C1 0.020(2) 0.023(2) 0.021(2) 0.0069(17) -0.0011(17) -0.0020(16) 
C2 0.024(2) 0.0145(19) 0.030(2) 0.0044(18) 0.0055(19) -0.0028(16) 
C3 0.022(2) 0.022(2) 0.032(3) 0.0079(19) 0.0050(19) 0.0002(17) 
C4 0.020(2) 0.028(2) 0.021(2) 0.0090(18) 0.0003(17) -0.0042(17) 
C5 0.028(2) 0.023(2) 0.018(2) 0.0020(18) 0.0036(17) -0.0040(18) 
C6 0.027(2) 0.017(2) 0.022(2) 0.0048(17) 0.0042(18) -0.0019(16) 
C7 0.023(2) 0.022(2) 0.023(2) 0.0020(18) -0.0006(18) -0.0029(17) 
C8 0.018(2) 0.021(2) 0.032(3) 0.0050(18) 0.0066(19) -0.0002(16) 
C9 0.027(2) 0.023(2) 0.034(3) 0.0001(19) 0.006(2) -0.0036(18) 
C10 0.018(2) 0.022(2) 0.025(2) 0.0003(18) 0.0066(18) 0.0020(16) 
C11 0.030(2) 0.026(2) 0.031(3) 0.004(2) 0.005(2) -0.0005(19) 
C12 0.021(2) 0.038(3) 0.045(3) -0.008(2) 0.005(2) -0.003(2) 
C13 0.027(3) 0.027(2) 0.056(3) -0.011(2) 0.017(2) -0.006(2) 
C14 0.042(3) 0.022(2) 0.041(3) 0.010(2) 0.013(2) 0.001(2) 
C15 0.029(2) 0.030(2) 0.030(3) 0.005(2) 0.006(2) 0.0028(19) 
C16 0.020(2) 0.026(2) 0.025(2) 0.0084(19) 0.0041(18) -0.0042(17) 
C17 0.030(3) 0.028(2) 0.036(3) -0.002(2) 0.004(2) -0.007(2) 
C18 0.048(3) 0.040(3) 0.026(3) -0.001(2) 0.001(2) -0.017(2) 
C19 0.039(3) 0.059(3) 0.025(3) 0.008(2) -0.008(2) -0.026(3) 
C20 0.024(3) 0.056(3) 0.034(3) 0.019(3) -0.005(2) -0.010(2) 
C21 0.025(2) 0.037(3) 0.034(3) 0.009(2) 0.005(2) -0.004(2) 
C22 0.016(2) 0.024(2) 0.027(2) 0.0058(18) 0.0022(18) -0.0004(17) 
C23 0.029(2) 0.027(2) 0.026(2) 0.003(2) 0.001(2) -0.0036(19) 
C24 0.029(3) 0.040(3) 0.035(3) 0.011(2) 0.000(2) -0.017(2) 
C25 0.031(3) 0.056(3) 0.034(3) 0.012(3) 0.011(2) -0.015(2) 
C26 0.044(3) 0.039(3) 0.031(3) -0.003(2) 0.013(2) -0.009(2) 
C27 0.026(2) 0.028(2) 0.035(3) 0.001(2) 0.005(2) -0.0096(19) 
C28 0.016(2) 0.023(2) 0.024(2) -0.0006(18) 0.0016(17) -0.0039(16) 
C29 0.022(2) 0.032(2) 0.027(2) 0.0059(19) 0.0052(19) -0.0004(18) 
C30 0.021(2) 0.028(2) 0.036(3) 0.009(2) 0.0039(19) 0.0045(17) 
C31 0.022(2) 0.044(3) 0.033(3) 0.017(2) -0.001(2) 0.000(2) 
C32 0.029(2) 0.044(3) 0.020(2) 0.007(2) -0.0003(19) -0.007(2) 
C33 0.026(2) 0.032(2) 0.026(2) 0.007(2) 0.0056(19) 0.0006(19) 
C34 0.027(2) 0.0175(19) 0.017(2) -0.0022(17) 0.0003(18) -0.0031(17) 
C35 0.027(2) 0.028(2) 0.028(3) -0.0032(19) 0.000(2) -0.0043(18) 
C36 0.032(3) 0.030(2) 0.039(3) -0.005(2) 0.008(2) -0.006(2) 
C37 0.041(3) 0.038(3) 0.032(3) -0.002(2) 0.009(2) -0.018(2) 
C38 0.046(3) 0.038(3) 0.032(3) 0.008(2) -0.001(2) -0.015(2) 
C39 0.032(2) 0.027(2) 0.026(3) 0.0019(19) 0.001(2) -0.0036(19) 
C40 0.034(3) 0.020(2) 0.020(2) 0.0002(17) 0.0023(19) 0.0024(18) 
C41 0.035(3) 0.026(2) 0.042(3) -0.006(2) 0.002(2) 0.003(2) 
C42 0.053(4) 0.030(3) 0.056(4) -0.017(2) 0.001(3) -0.001(2) 
C43 0.064(4) 0.026(2) 0.045(3) -0.009(2) 0.009(3) 0.010(2) 
C44 0.045(3) 0.038(3) 0.032(3) 0.005(2) 0.011(2) 0.021(2) 
C45 0.037(3) 0.023(2) 0.021(2) 0.0055(18) 0.005(2) 0.0033(19) 
C46 0.019(2) 0.0177(19) 0.021(2) -0.0006(17) -0.0023(17) -0.0024(16) 
C47 0.026(2) 0.024(2) 0.021(2) 0.0055(18) 0.0063(18) 0.0040(17) 
C48 0.028(2) 0.023(2) 0.032(3) 0.0052(19) 0.000(2) 0.0049(18) 
C49 0.035(3) 0.027(2) 0.025(2) 0.0091(19) -0.001(2) -0.004(2) 
C50 0.028(2) 0.037(2) 0.024(2) 0.003(2) 0.004(2) -0.005(2) 
C51 0.022(2) 0.022(2) 0.020(2) -0.0035(18) -0.0014(18) 0.0005(17) 
C52 0.025(2) 0.024(2) 0.023(2) -0.0033(18) -0.0022(18) 0.0075(17) 
C53 0.023(2) 0.033(2) 0.025(2) -0.0073(19) -0.0013(19) 0.0058(18) 
C54 0.021(2) 0.063(3) 0.039(3) -0.016(3) -0.007(2) 0.012(2) 
C55 0.038(3) 0.070(4) 0.051(4) -0.023(3) -0.018(3) 0.037(3) 
C56 0.057(4) 0.041(3) 0.037(3) -0.006(2) -0.015(3) 0.027(3) 
C57 0.043(3) 0.033(2) 0.025(3) -0.005(2) -0.008(2) 0.013(2) 
C58 0.027(2) 0.022(2) 0.0133(19) 0.0007(18) 0.0017(16) -0.0058(18) 
C59 0.036(3) 0.023(2) 0.022(2) -0.0004(18) 0.002(2) -0.0050(19) 
C60 0.050(3) 0.020(2) 0.026(3) -0.0031(19) 0.006(2) -0.002(2) 
C61 0.043(3) 0.033(2) 0.020(2) -0.003(2) 0.004(2) -0.019(2) 
C62 0.026(2) 0.040(3) 0.027(3) 0.004(2) 0.003(2) -0.009(2) 
C63 0.028(2) 0.022(2) 0.026(2) 0.0013(18) 0.0045(19) -0.0014(17) 
 
_geom_special_details 
; 
 All esds (except the esd in the dihedral angle between two l.s. planes) 
 are estimated using the full covariance matrix.  The cell esds are taken 
 into account individually in the estimation of esds in distances, angles 
 and torsion angles; correlations between esds in cell parameters are only 
 used when they are defined by crystal symmetry.  An approximate (isotropic) 
 treatment of cell esds is used for estimating esds involving l.s. planes. 
; 
 
loop_ 
 _geom_bond_atom_site_label_1 
 _geom_bond_atom_site_label_2 
 _geom_bond_distance 
 _geom_bond_site_symmetry_2 
 _geom_bond_publ_flag 
Ru1 C5 2.264(4) . ? 
Ru1 C2 2.269(4) . ? 
Ru1 C1 2.277(4) . ? 
Ru1 C4 2.280(4) . ? 
Ru1 P2 2.3076(11) . ? 
Ru1 P1 2.3129(11) . ? 
Ru1 C6 2.315(4) . ? 
Ru1 C3 2.323(4) . ? 
P1 C28 1.829(4) . ? 
P1 C34 1.833(4) . ? 
P1 C40 1.841(4) . ? 
P2 C46 1.828(4) . ? 
P2 C52 1.835(4) . ? 
P2 C58 1.843(4) . ? 
S1 C6 1.759(4) . ? 
S1 C7 1.811(4) . ? 
B1 C8 1.645(5) . ? 
B1 C7 1.656(6) . ? 
B1 C16 1.658(6) . ? 
B1 C22 1.663(6) . ? 
F1 C17 1.360(5) . ? 
F2 C18 1.353(5) . ? 
F3 C19 1.343(5) . ? 
F4 C20 1.344(5) . ? 
F5 C21 1.364(5) . ? 
F6 C23 1.359(5) . ? 
F7 C24 1.342(5) . ? 
F8 C25 1.348(5) . ? 
F9 C26 1.363(5) . ? 
F10 C27 1.366(4) . ? 
C1 C2 1.415(5) . ? 
C1 C6 1.419(5) . ? 
C1 H1A 1.0000 . ? 
C2 C3 1.400(6) . ? 
C2 H2A 1.0000 . ? 
C3 C4 1.403(6) . ? 
C3 H3A 1.0000 . ? 
C4 C5 1.409(5) . ? 
C4 H4A 1.0000 . ? 
C5 C6 1.416(5) . ? 
C5 H5A 1.0000 . ? 
C7 H7A 0.9900 . ? 
C7 H7B 0.9900 . ? 
C8 C9 1.543(5) . ? 
C8 H8A 0.9900 . ? 
C8 H8B 0.9900 . ? 
C9 C10 1.523(5) . ? 
C9 H9A 0.9900 . ? 
C9 H9B 0.9900 . ? 
C10 C11 1.388(6) . ? 
C10 C15 1.393(5) . ? 
C11 C12 1.387(6) . ? 
C11 H11A 0.9500 . ? 
C12 C13 1.383(6) . ? 
C12 H12A 0.9500 . ? 
C13 C14 1.363(6) . ? 
C13 H13A 0.9500 . ? 
C14 C15 1.391(6) . ? 
C14 H14A 0.9500 . ? 
C15 H15A 0.9500 . ? 
C16 C21 1.387(6) . ? 
C16 C17 1.390(6) . ? 
C17 C18 1.372(6) . ? 
C18 C19 1.371(7) . ? 
C19 C20 1.374(7) . ? 
C20 C21 1.376(6) . ? 
C22 C23 1.384(5) . ? 
C22 C27 1.387(6) . ? 
C23 C24 1.372(6) . ? 
C24 C25 1.373(6) . ? 
C25 C26 1.372(6) . ? 
C26 C27 1.367(6) . ? 
C28 C33 1.395(6) . ? 
C28 C29 1.398(5) . ? 
C29 C30 1.379(5) . ? 
C29 H29A 0.9500 . ? 
C30 C31 1.384(6) . ? 
C30 H30A 0.9500 . ? 
C31 C32 1.378(6) . ? 
C31 H31A 0.9500 . ? 
C32 C33 1.393(5) . ? 
C32 H32A 0.9500 . ? 
C33 H33A 0.9500 . ? 
C34 C39 1.385(5) . ? 
C34 C35 1.389(5) . ? 
C35 C36 1.395(6) . ? 
C35 H35A 0.9500 . ? 
C36 C37 1.366(6) . ? 
C36 H36A 0.9500 . ? 
C37 C38 1.389(6) . ? 
C37 H37A 0.9500 . ? 
C38 C39 1.385(6) . ? 
C38 H38A 0.9500 . ? 
C39 H39A 0.9500 . ? 
C40 C45 1.394(6) . ? 
C40 C41 1.397(6) . ? 
C41 C42 1.378(6) . ? 
C41 H41A 0.9500 . ? 
C42 C43 1.390(7) . ? 
C42 H42A 0.9500 . ? 
C43 C44 1.373(6) . ? 
C43 H43A 0.9500 . ? 
C44 C45 1.385(6) . ? 
C44 H44A 0.9500 . ? 
C45 H45A 0.9500 . ? 
C46 C47 1.389(5) . ? 
C46 C51 1.394(5) . ? 
C47 C48 1.402(5) . ? 
C47 H47A 0.9500 . ? 
C48 C49 1.374(6) . ? 
C48 H48A 0.9500 . ? 
C49 C50 1.375(5) . ? 
C49 H49A 0.9500 . ? 
C50 C51 1.387(5) . ? 
C50 H50A 0.9500 . ? 
C51 H51A 0.9500 . ? 
C52 C53 1.382(5) . ? 
C52 C57 1.414(6) . ? 
C53 C54 1.387(6) . ? 
C53 H53A 0.9500 . ? 
C54 C55 1.378(7) . ? 
C54 H54A 0.9500 . ? 
C55 C56 1.383(7) . ? 
C55 H55A 0.9500 . ? 
C56 C57 1.370(6) . ? 
C56 H56A 0.9500 . ? 
C57 H57A 0.9500 . ? 
C58 C59 1.391(5) . ? 
C58 C63 1.397(5) . ? 
C59 C60 1.387(6) . ? 
C59 H59A 0.9500 . ? 
C60 C61 1.379(6) . ? 
C60 H60A 0.9500 . ? 
C61 C62 1.383(6) . ? 
C61 H61A 0.9500 . ? 
C62 C63 1.377(6) . ? 
C62 H62A 0.9500 . ? 
C63 H63A 0.9500 . ? 
 
loop_ 
 _geom_angle_atom_site_label_1 
 _geom_angle_atom_site_label_2 
 _geom_angle_atom_site_label_3 
 _geom_angle 
 _geom_angle_site_symmetry_1 
 _geom_angle_site_symmetry_3 
 _geom_angle_publ_flag 
C5 Ru1 C2 76.17(14) . . ? 
C5 Ru1 C1 64.71(14) . . ? 
C2 Ru1 C1 36.27(13) . . ? 
C5 Ru1 C4 36.12(13) . . ? 
C2 Ru1 C4 63.80(14) . . ? 
C1 Ru1 C4 75.89(14) . . ? 
C5 Ru1 P2 166.38(10) . . ? 
C2 Ru1 P2 90.55(11) . . ? 
C1 Ru1 P2 102.72(10) . . ? 
C4 Ru1 P2 138.99(10) . . ? 
C5 Ru1 P1 96.28(10) . . ? 
C2 Ru1 P1 147.55(10) . . ? 
C1 Ru1 P1 160.50(10) . . ? 
C4 Ru1 P1 91.34(10) . . ? 
P2 Ru1 P1 96.59(4) . . ? 
C5 Ru1 C6 36.02(13) . . ? 
C2 Ru1 C6 64.80(13) . . ? 
C1 Ru1 C6 35.99(13) . . ? 
C4 Ru1 C6 64.57(14) . . ? 
P2 Ru1 C6 134.64(10) . . ? 
P1 Ru1 C6 125.01(10) . . ? 
C5 Ru1 C3 64.62(14) . . ? 
C2 Ru1 C3 35.48(14) . . ? 
C1 Ru1 C3 64.56(13) . . ? 
C4 Ru1 C3 35.49(14) . . ? 
P2 Ru1 C3 106.05(11) . . ? 
P1 Ru1 C3 112.67(11) . . ? 
C6 Ru1 C3 76.20(13) . . ? 
C28 P1 C34 102.65(18) . . ? 
C28 P1 C40 105.04(18) . . ? 
C34 P1 C40 98.33(18) . . ? 
C28 P1 Ru1 110.62(12) . . ? 
C34 P1 Ru1 122.98(13) . . ? 
C40 P1 Ru1 115.07(14) . . ? 
C46 P2 C52 105.99(18) . . ? 
C46 P2 C58 96.30(17) . . ? 
C52 P2 C58 104.91(18) . . ? 
C46 P2 Ru1 121.91(13) . . ? 
C52 P2 Ru1 112.10(14) . . ? 
C58 P2 Ru1 113.47(13) . . ? 
C6 S1 C7 103.27(18) . . ? 
C8 B1 C7 109.4(3) . . ? 
C8 B1 C16 108.4(3) . . ? 
C7 B1 C16 111.1(3) . . ? 
C8 B1 C22 115.3(3) . . ? 
C7 B1 C22 106.5(3) . . ? 
C16 B1 C22 106.1(3) . . ? 
C2 C1 C6 120.2(4) . . ? 
C2 C1 Ru1 71.6(2) . . ? 
C6 C1 Ru1 73.5(2) . . ? 
C2 C1 H1A 119.6 . . ? 
C6 C1 H1A 119.6 . . ? 
Ru1 C1 H1A 119.6 . . ? 
C3 C2 C1 121.6(4) . . ? 
C3 C2 Ru1 74.4(2) . . ? 
C1 C2 Ru1 72.2(2) . . ? 
C3 C2 H2A 119.0 . . ? 
C1 C2 H2A 119.0 . . ? 
Ru1 C2 H2A 119.0 . . ? 
C2 C3 C4 118.1(4) . . ? 
C2 C3 Ru1 70.2(2) . . ? 
C4 C3 Ru1 70.6(2) . . ? 
C2 C3 H3A 120.4 . . ? 
C4 C3 H3A 120.4 . . ? 
Ru1 C3 H3A 120.4 . . ? 
C3 C4 C5 121.4(4) . . ? 
C3 C4 Ru1 73.9(2) . . ? 
C5 C4 Ru1 71.3(2) . . ? 
C3 C4 H4A 119.0 . . ? 
C5 C4 H4A 119.0 . . ? 
Ru1 C4 H4A 119.0 . . ? 
C4 C5 C6 120.7(4) . . ? 
C4 C5 Ru1 72.6(2) . . ? 
C6 C5 Ru1 74.0(2) . . ? 
C4 C5 H5A 119.5 . . ? 
C6 C5 H5A 119.5 . . ? 
Ru1 C5 H5A 119.5 . . ? 
C5 C6 C1 118.0(4) . . ? 
C5 C6 S1 117.9(3) . . ? 
C1 C6 S1 124.1(3) . . ? 
C5 C6 Ru1 70.0(2) . . ? 
C1 C6 Ru1 70.5(2) . . ? 
S1 C6 Ru1 130.22(18) . . ? 
B1 C7 S1 109.4(3) . . ? 
B1 C7 H7A 109.8 . . ? 
S1 C7 H7A 109.8 . . ? 
B1 C7 H7B 109.8 . . ? 
S1 C7 H7B 109.8 . . ? 
H7A C7 H7B 108.2 . . ? 
C9 C8 B1 113.4(3) . . ? 
C9 C8 H8A 108.9 . . ? 
B1 C8 H8A 108.9 . . ? 
C9 C8 H8B 108.9 . . ? 
B1 C8 H8B 108.9 . . ? 
H8A C8 H8B 107.7 . . ? 
C10 C9 C8 115.0(3) . . ? 
C10 C9 H9A 108.5 . . ? 
C8 C9 H9A 108.5 . . ? 
C10 C9 H9B 108.5 . . ? 
C8 C9 H9B 108.5 . . ? 
H9A C9 H9B 107.5 . . ? 
C11 C10 C15 118.2(4) . . ? 
C11 C10 C9 119.4(4) . . ? 
C15 C10 C9 122.3(4) . . ? 
C12 C11 C10 121.5(4) . . ? 
C12 C11 H11A 119.3 . . ? 
C10 C11 H11A 119.3 . . ? 
C13 C12 C11 119.6(4) . . ? 
C13 C12 H12A 120.2 . . ? 
C11 C12 H12A 120.2 . . ? 
C14 C13 C12 119.5(4) . . ? 
C14 C13 H13A 120.2 . . ? 
C12 C13 H13A 120.2 . . ? 
C13 C14 C15 121.4(4) . . ? 
C13 C14 H14A 119.3 . . ? 
C15 C14 H14A 119.3 . . ? 
C14 C15 C10 119.8(4) . . ? 
C14 C15 H15A 120.1 . . ? 
C10 C15 H15A 120.1 . . ? 
C21 C16 C17 112.6(4) . . ? 
C21 C16 B1 120.2(4) . . ? 
C17 C16 B1 127.1(4) . . ? 
F1 C17 C18 115.2(4) . . ? 
F1 C17 C16 120.2(4) . . ? 
C18 C17 C16 124.7(4) . . ? 
F2 C18 C19 120.0(4) . . ? 
F2 C18 C17 120.4(5) . . ? 
C19 C18 C17 119.6(4) . . ? 
F3 C19 C18 120.5(5) . . ? 
F3 C19 C20 120.5(5) . . ? 
C18 C19 C20 119.0(4) . . ? 
F4 C20 C19 119.3(4) . . ? 
F4 C20 C21 121.4(5) . . ? 
C19 C20 C21 119.2(5) . . ? 
F5 C21 C20 115.4(4) . . ? 
F5 C21 C16 119.7(4) . . ? 
C20 C21 C16 124.9(5) . . ? 
C23 C22 C27 112.4(4) . . ? 
C23 C22 B1 120.5(4) . . ? 
C27 C22 B1 127.1(3) . . ? 
F6 C23 C24 115.0(4) . . ? 
F6 C23 C22 119.7(4) . . ? 
C24 C23 C22 125.4(4) . . ? 
F7 C24 C23 121.3(4) . . ? 
F7 C24 C25 119.4(4) . . ? 
C23 C24 C25 119.3(4) . . ? 
F8 C25 C26 120.6(4) . . ? 
F8 C25 C24 121.3(4) . . ? 
C26 C25 C24 118.1(4) . . ? 
F9 C26 C27 120.8(4) . . ? 
F9 C26 C25 118.8(4) . . ? 
C27 C26 C25 120.4(4) . . ? 
F10 C27 C26 115.4(4) . . ? 
F10 C27 C22 120.1(4) . . ? 
C26 C27 C22 124.4(4) . . ? 
C33 C28 C29 118.2(4) . . ? 
C33 C28 P1 124.3(3) . . ? 
C29 C28 P1 117.5(3) . . ? 
C30 C29 C28 121.1(4) . . ? 
C30 C29 H29A 119.4 . . ? 
C28 C29 H29A 119.4 . . ? 
C29 C30 C31 119.9(4) . . ? 
C29 C30 H30A 120.0 . . ? 
C31 C30 H30A 120.0 . . ? 
C32 C31 C30 120.2(4) . . ? 
C32 C31 H31A 119.9 . . ? 
C30 C31 H31A 119.9 . . ? 
C31 C32 C33 119.9(4) . . ? 
C31 C32 H32A 120.1 . . ? 
C33 C32 H32A 120.1 . . ? 
C32 C33 C28 120.7(4) . . ? 
C32 C33 H33A 119.7 . . ? 
C28 C33 H33A 119.7 . . ? 
C39 C34 C35 118.8(4) . . ? 
C39 C34 P1 117.6(3) . . ? 
C35 C34 P1 123.7(3) . . ? 
C34 C35 C36 120.2(4) . . ? 
C34 C35 H35A 119.9 . . ? 
C36 C35 H35A 119.9 . . ? 
C37 C36 C35 120.4(4) . . ? 
C37 C36 H36A 119.8 . . ? 
C35 C36 H36A 119.8 . . ? 
C36 C37 C38 120.1(4) . . ? 
C36 C37 H37A 120.0 . . ? 
C38 C37 H37A 120.0 . . ? 
C39 C38 C37 119.6(4) . . ? 
C39 C38 H38A 120.2 . . ? 
C37 C38 H38A 120.2 . . ? 
C34 C39 C38 121.0(4) . . ? 
C34 C39 H39A 119.5 . . ? 
C38 C39 H39A 119.5 . . ? 
C45 C40 C41 118.9(4) . . ? 
C45 C40 P1 121.9(3) . . ? 
C41 C40 P1 119.1(3) . . ? 
C42 C41 C40 120.9(4) . . ? 
C42 C41 H41A 119.6 . . ? 
C40 C41 H41A 119.6 . . ? 
C41 C42 C43 119.5(5) . . ? 
C41 C42 H42A 120.2 . . ? 
C43 C42 H42A 120.2 . . ? 
C44 C43 C42 120.2(4) . . ? 
C44 C43 H43A 119.9 . . ? 
C42 C43 H43A 119.9 . . ? 
C43 C44 C45 120.7(4) . . ? 
C43 C44 H44A 119.7 . . ? 
C45 C44 H44A 119.7 . . ? 
C44 C45 C40 119.8(4) . . ? 
C44 C45 H45A 120.1 . . ? 
C40 C45 H45A 120.1 . . ? 
C47 C46 C51 118.8(4) . . ? 
C47 C46 P2 120.0(3) . . ? 
C51 C46 P2 120.8(3) . . ? 
C46 C47 C48 120.4(4) . . ? 
C46 C47 H47A 119.8 . . ? 
C48 C47 H47A 119.8 . . ? 
C49 C48 C47 119.6(4) . . ? 
C49 C48 H48A 120.2 . . ? 
C47 C48 H48A 120.2 . . ? 
C48 C49 C50 120.5(4) . . ? 
C48 C49 H49A 119.8 . . ? 
C50 C49 H49A 119.8 . . ? 
C49 C50 C51 120.2(4) . . ? 
C49 C50 H50A 119.9 . . ? 
C51 C50 H50A 119.9 . . ? 
C50 C51 C46 120.4(4) . . ? 
C50 C51 H51A 119.8 . . ? 
C46 C51 H51A 119.8 . . ? 
C53 C52 C57 117.9(4) . . ? 
C53 C52 P2 124.1(3) . . ? 
C57 C52 P2 117.7(3) . . ? 
C52 C53 C54 121.0(4) . . ? 
C52 C53 H53A 119.5 . . ? 
C54 C53 H53A 119.5 . . ? 
C55 C54 C53 120.0(5) . . ? 
C55 C54 H54A 120.0 . . ? 
C53 C54 H54A 120.0 . . ? 
C54 C55 C56 120.1(4) . . ? 
C54 C55 H55A 119.9 . . ? 
C56 C55 H55A 119.9 . . ? 
C57 C56 C55 120.1(5) . . ? 
C57 C56 H56A 120.0 . . ? 
C55 C56 H56A 120.0 . . ? 
C56 C57 C52 120.9(5) . . ? 
C56 C57 H57A 119.6 . . ? 
C52 C57 H57A 119.6 . . ? 
C59 C58 C63 118.2(4) . . ? 
C59 C58 P2 124.4(3) . . ? 
C63 C58 P2 117.3(3) . . ? 
C60 C59 C58 120.6(4) . . ? 
C60 C59 H59A 119.7 . . ? 
C58 C59 H59A 119.7 . . ? 
C61 C60 C59 120.6(4) . . ? 
C61 C60 H60A 119.7 . . ? 
C59 C60 H60A 119.7 . . ? 
C60 C61 C62 119.2(4) . . ? 
C60 C61 H61A 120.4 . . ? 
C62 C61 H61A 120.4 . . ? 
C63 C62 C61 120.6(4) . . ? 
C63 C62 H62A 119.7 . . ? 
C61 C62 H62A 119.7 . . ? 
C62 C63 C58 120.8(4) . . ? 
C62 C63 H63A 119.6 . . ? 
C58 C63 H63A 119.6 . . ? 
 
_diffrn_measured_fraction_theta_max    1.000 
_diffrn_reflns_theta_full              27.51 
_diffrn_measured_fraction_theta_full   1.000 
_refine_diff_density_max    0.859 
_refine_diff_density_min   -0.526 
_refine_diff_density_rms    0.101 
#===end
  
data_fd036_0m 
  
_audit_creation_method            SHELXL-97 
_chemical_formula_sum 
 'C71 H57 B F10 O0 P2 Rh S' 
_chemical_formula_weight          1307.89 
  
loop_ 
 _atom_type_symbol 
 _atom_type_description 
 _atom_type_scat_dispersion_real 
 _atom_type_scat_dispersion_imag 
 _atom_type_scat_source 
 'C'  'C'   0.0033   0.0016 
 'International Tables Vol C Tables 4.2.6.8 and 6.1.1.4' 
 'H'  'H'   0.0000   0.0000 
 'International Tables Vol C Tables 4.2.6.8 and 6.1.1.4' 
 'O'  'O'   0.0106   0.0060 
 'International Tables Vol C Tables 4.2.6.8 and 6.1.1.4' 
 'B'  'B'   0.0013   0.0007 
 'International Tables Vol C Tables 4.2.6.8 and 6.1.1.4' 
 'F'  'F'   0.0171   0.0103 
 'International Tables Vol C Tables 4.2.6.8 and 6.1.1.4' 
 'P'  'P'   0.1023   0.0942 
 'International Tables Vol C Tables 4.2.6.8 and 6.1.1.4' 
 'S'  'S'   0.1246   0.1234 
 'International Tables Vol C Tables 4.2.6.8 and 6.1.1.4' 
 'Rh'  'Rh'  -1.1178   0.9187 
 'International Tables Vol C Tables 4.2.6.8 and 6.1.1.4' 
  
_symmetry_cell_setting            Monoclinic 
_symmetry_space_group_name_H-M    P2(1)/c 
  
loop_ 
 _symmetry_equiv_pos_as_xyz 
 'x, y, z' 
 '-x, y+1/2, -z+1/2' 
 '-x, -y, -z' 
 'x, -y-1/2, z-1/2' 
  
_cell_length_a                    11.3327(4) 
_cell_length_b                    21.2938(7) 
_cell_length_c                    25.8710(10) 
_cell_angle_alpha                 90.00 
_cell_angle_beta                  98.8090(10) 
_cell_angle_gamma                 90.00 
_cell_volume                      6169.5(4) 
_cell_formula_units_Z             4 
_cell_measurement_temperature     223(2) 
_cell_measurement_reflns_used     9962 
_cell_measurement_theta_min       2.30 
_cell_measurement_theta_max       26.47 
  
_exptl_crystal_description        needle 
_exptl_crystal_colour             orange 
_exptl_crystal_size_max           0.15 
_exptl_crystal_size_mid           0.15 
_exptl_crystal_size_min           0.10 
_exptl_crystal_density_meas       ? 
_exptl_crystal_density_diffrn     1.408 
_exptl_crystal_density_method     'not measured' 
_exptl_crystal_F_000              2676 
_exptl_absorpt_coefficient_mu     0.435 
_exptl_absorpt_correction_type    multi-scan 
_exptl_absorpt_correction_T_min   0.9376 
_exptl_absorpt_correction_T_max   0.9578 
_exptl_absorpt_process_details    sadabs 
  
_exptl_special_details 
; 
 ? 
; 
  
_diffrn_ambient_temperature       223(2) 
_diffrn_radiation_wavelength      0.71073 
_diffrn_radiation_type            MoK\a 
_diffrn_radiation_source          'fine-focus sealed tube' 
_diffrn_radiation_monochromator   graphite 
_diffrn_measurement_device_type   'Bruker APEX-II CCD' 
_diffrn_measurement_method        '\f and \w scans' 
_diffrn_detector_area_resol_mean  ? 
_diffrn_standards_number          0 
_diffrn_standards_interval_count  ? 
_diffrn_standards_interval_time   ? 
_diffrn_standards_decay_%         ? 
_diffrn_reflns_number             53991 
_diffrn_reflns_av_R_equivalents   0.0453 
_diffrn_reflns_av_sigmaI/netI     0.0556 
_diffrn_reflns_limit_h_min        -14 
_diffrn_reflns_limit_h_max        12 
_diffrn_reflns_limit_k_min        -22 
_diffrn_reflns_limit_k_max        27 
_diffrn_reflns_limit_l_min        -33 
_diffrn_reflns_limit_l_max        33 
_diffrn_reflns_theta_min          1.86 
_diffrn_reflns_theta_max          27.48 
_reflns_number_total              13935 
_reflns_number_gt                 9854 
_reflns_threshold_expression      >2sigma(I) 
  
_computing_data_collection        'Bruker APEX2' 
_computing_cell_refinement        'Bruker SAINT' 
_computing_data_reduction         'Bruker SAINT' 
_computing_structure_solution     'SHELXS-97 (Sheldrick, 1990)' 
_computing_structure_refinement   'SHELXL-97 (Sheldrick, 1997)' 
_computing_molecular_graphics     'Bruker SHELXTL' 
_computing_publication_material   'Bruker SHELXTL' 
  
_refine_special_details 
; 
 Refinement of F^2^ against ALL reflections.  The weighted R-factor wR and 
 goodness of fit S are based on F^2^, conventional R-factors R are based 
 on F, with F set to zero for negative F^2^. The threshold expression of 
 F^2^ > 2sigma(F^2^) is used only for calculating R-factors(gt) etc. and is 
 not relevant to the choice of reflections for refinement.  R-factors based 
 on F^2^ are statistically about twice as large as those based on F, and R- 
 factors based on ALL data will be even larger. 
; 
  
_refine_ls_structure_factor_coef  Fsqd 
_refine_ls_matrix_type            full 
_refine_ls_weighting_scheme       calc 
_refine_ls_weighting_details 
 'calc w=1/[\s^2^(Fo^2^)+(0.0487P)^2^+3.1280P] where P=(Fo^2^+2Fc^2^)/3' 
_atom_sites_solution_primary      direct 
_atom_sites_solution_secondary    difmap 
_atom_sites_solution_hydrogens    geom 
_refine_ls_hydrogen_treatment     constr 
_refine_ls_extinction_method      none 
_refine_ls_extinction_coef        ? 
_refine_ls_number_reflns          13935 
_refine_ls_number_parameters      735 
_refine_ls_number_restraints      0 
_refine_ls_R_factor_all           0.0751 
_refine_ls_R_factor_gt            0.0438 
_refine_ls_wR_factor_ref          0.1082 
_refine_ls_wR_factor_gt           0.0967 
_refine_ls_goodness_of_fit_ref    1.013 
_refine_ls_restrained_S_all       1.013 
_refine_ls_shift/su_max           0.002 
_refine_ls_shift/su_mean          0.000 
  
loop_ 
 _atom_site_label 
 _atom_site_type_symbol 
 _atom_site_fract_x 
 _atom_site_fract_y 
 _atom_site_fract_z 
 _atom_site_U_iso_or_equiv 
 _atom_site_adp_type 
 _atom_site_occupancy 
 _atom_site_symmetry_multiplicity 
 _atom_site_calc_flag 
 _atom_site_refinement_flags 
 _atom_site_disorder_assembly 
 _atom_site_disorder_group 
Rh1 Rh 0.359275(18) 0.675722(10) 0.269314(8) 0.02416(7) Uani 1 1 d . . . 
S1 S 0.55505(6) 0.71914(3) 0.27304(3) 0.03064(16) Uani 1 1 d . . . 
P1 P 0.42580(6) 0.59311(3) 0.22335(3) 0.02826(16) Uani 1 1 d . . . 
P2 P 0.18771(6) 0.62678(3) 0.28150(3) 0.02627(16) Uani 1 1 d . . . 
F2 F 0.3258(2) 0.99089(9) 0.40122(9) 0.0685(6) Uani 1 1 d . . . 
F3 F 0.5427(2) 1.01899(9) 0.45754(8) 0.0703(6) Uani 1 1 d . . . 
F4 F 0.70834(19) 0.92661(10) 0.47879(8) 0.0664(6) Uani 1 1 d . . . 
F5 F 0.66895(17) 0.81326(9) 0.43632(8) 0.0574(5) Uani 1 1 d . . . 
F1 F 0.28256(16) 0.87829(8) 0.35937(8) 0.0527(5) Uani 1 1 d . . . 
F9 F 0.6304(2) 0.57661(11) 0.46445(10) 0.0875(8) Uani 1 1 d . . . 
F8 F 0.4506(3) 0.57847(11) 0.52296(9) 0.0892(8) Uani 1 1 d . . . 
F7 F 0.2894(2) 0.67453(10) 0.51037(8) 0.0670(6) Uani 1 1 d . . . 
F6 F 0.30423(15) 0.76343(8) 0.43946(7) 0.0435(4) Uani 1 1 d . . . 
F10 F 0.64829(17) 0.66513(10) 0.39401(8) 0.0604(6) Uani 1 1 d . . . 
C21 C 0.5739(3) 0.77296(15) 0.32858(12) 0.0397(7) Uani 1 1 d . . . 
H21A H 0.6495 0.7631 0.3509 0.048 Uiso 1 1 calc R . . 
H21B H 0.5801 0.8158 0.3154 0.048 Uiso 1 1 calc R . . 
C8 C 0.3502(2) 0.76146(12) 0.32159(11) 0.0280(6) Uani 1 1 d . . . 
C7 C 0.2762(2) 0.76807(12) 0.28212(11) 0.0308(6) Uani 1 1 d . . . 
C6 C 0.1805(3) 0.79513(13) 0.24490(12) 0.0361(7) Uani 1 1 d . . . 
C5 C 0.0833(3) 0.82332(16) 0.26256(18) 0.0587(10) Uani 1 1 d . . . 
H5A H 0.0775 0.8238 0.2984 0.070 Uiso 1 1 calc R . . 
C4 C -0.0051(3) 0.8508(2) 0.2266(2) 0.0854(16) Uani 1 1 d . . . 
H4A H -0.0708 0.8699 0.2384 0.102 Uiso 1 1 calc R . . 
C3 C 0.0014(4) 0.8505(2) 0.1745(2) 0.0875(17) Uani 1 1 d . . . 
H3A H -0.0600 0.8688 0.1507 0.105 Uiso 1 1 calc R . . 
C2 C 0.0971(4) 0.82375(18) 0.15697(17) 0.0742(13) Uani 1 1 d . . . 
H2A H 0.1022 0.8242 0.1210 0.089 Uiso 1 1 calc R . . 
C1 C 0.1870(3) 0.79583(15) 0.19179(14) 0.0500(9) Uani 1 1 d . . . 
H1A H 0.2526 0.7773 0.1794 0.060 Uiso 1 1 calc R . . 
C9 C 0.4753(3) 0.84008(13) 0.39377(11) 0.0330(6) Uani 1 1 d . . . 
C10 C 0.3913(3) 0.88755(14) 0.38769(11) 0.0366(7) Uani 1 1 d . . . 
C11 C 0.4115(3) 0.94669(15) 0.40918(13) 0.0457(8) Uani 1 1 d . . . 
C12 C 0.5195(3) 0.96059(15) 0.43851(13) 0.0479(9) Uani 1 1 d . . . 
C13 C 0.6034(3) 0.91464(16) 0.44806(12) 0.0452(8) Uani 1 1 d . . . 
C14 C 0.5800(3) 0.85642(15) 0.42587(12) 0.0412(7) Uani 1 1 d . . . 
C15 C 0.4720(2) 0.71720(13) 0.41046(11) 0.0319(6) Uani 1 1 d . . . 
C20 C 0.5547(3) 0.66906(15) 0.42087(12) 0.0436(8) Uani 1 1 d . . . 
C19 C 0.5489(4) 0.62316(16) 0.45802(14) 0.0556(10) Uani 1 1 d . . . 
C18 C 0.4596(4) 0.62430(16) 0.48756(14) 0.0549(10) Uani 1 1 d . . . 
C17 C 0.3776(3) 0.67209(16) 0.48107(12) 0.0470(8) Uani 1 1 d . . . 
C16 C 0.3864(3) 0.71705(14) 0.44359(11) 0.0365(7) Uani 1 1 d . . . 
C22 C 0.5687(3) 0.77113(14) 0.22009(12) 0.0390(7) Uani 1 1 d . . . 
C27 C 0.6578(3) 0.75835(18) 0.19084(14) 0.0554(9) Uani 1 1 d . . . 
H27A H 0.7088 0.7238 0.1990 0.066 Uiso 1 1 calc R . . 
C26 C 0.6713(5) 0.7976(2) 0.14882(16) 0.0806(14) Uani 1 1 d . . . 
H26A H 0.7314 0.7896 0.1284 0.097 Uiso 1 1 calc R . . 
C25 C 0.5959(6) 0.8479(3) 0.13766(19) 0.0971(18) Uani 1 1 d . . . 
H25A H 0.6038 0.8737 0.1089 0.116 Uiso 1 1 calc R . . 
C24 C 0.5097(5) 0.8610(2) 0.16748(19) 0.0843(15) Uani 1 1 d . . . 
H24A H 0.4597 0.8960 0.1595 0.101 Uiso 1 1 calc R . . 
C23 C 0.4958(3) 0.82312(16) 0.20925(16) 0.0585(10) Uani 1 1 d . . . 
H23A H 0.4373 0.8325 0.2302 0.070 Uiso 1 1 calc R . . 
C34 C 0.4670(3) 0.62664(13) 0.16323(11) 0.0333(7) Uani 1 1 d . . . 
C35 C 0.5729(3) 0.61405(14) 0.14454(13) 0.0426(8) Uani 1 1 d . . . 
H35A H 0.6302 0.5875 0.1635 0.051 Uiso 1 1 calc R . . 
C36 C 0.5943(4) 0.64044(16) 0.09804(14) 0.0565(10) Uani 1 1 d . . . 
H36A H 0.6658 0.6312 0.0855 0.068 Uiso 1 1 calc R . . 
C37 C 0.5128(4) 0.67979(17) 0.07006(14) 0.0590(10) Uani 1 1 d . . . 
H37A H 0.5283 0.6975 0.0385 0.071 Uiso 1 1 calc R . . 
C38 C 0.4084(4) 0.69311(17) 0.08850(14) 0.0585(10) Uani 1 1 d . . . 
H38A H 0.3522 0.7201 0.0694 0.070 Uiso 1 1 calc R . . 
C39 C 0.3852(3) 0.66717(15) 0.13481(13) 0.0447(8) Uani 1 1 d . . . 
H39A H 0.3137 0.6769 0.1472 0.054 Uiso 1 1 calc R . . 
C28 C 0.5591(2) 0.55058(13) 0.25421(11) 0.0328(6) Uani 1 1 d . . . 
C33 C 0.6016(3) 0.49829(15) 0.22959(13) 0.0432(8) Uani 1 1 d . . . 
H33A H 0.5617 0.4849 0.1969 0.052 Uiso 1 1 calc R . . 
C32 C 0.7015(3) 0.46643(16) 0.25309(17) 0.0577(10) Uani 1 1 d . . . 
H32A H 0.7298 0.4316 0.2363 0.069 Uiso 1 1 calc R . . 
C31 C 0.7604(3) 0.48560(19) 0.30143(18) 0.0665(11) Uani 1 1 d . . . 
H31A H 0.8289 0.4640 0.3172 0.080 Uiso 1 1 calc R . . 
C30 C 0.7187(3) 0.53623(19) 0.32639(16) 0.0641(11) Uani 1 1 d . . . 
H30A H 0.7578 0.5489 0.3594 0.077 Uiso 1 1 calc R . . 
C29 C 0.6188(3) 0.56829(15) 0.30249(13) 0.0427(8) Uani 1 1 d . . . 
H29A H 0.5909 0.6030 0.3196 0.051 Uiso 1 1 calc R . . 
C40 C 0.3334(3) 0.52532(13) 0.19868(12) 0.0343(7) Uani 1 1 d . . . 
C41 C 0.3281(3) 0.47391(14) 0.23171(13) 0.0408(7) Uani 1 1 d . . . 
H41A H 0.3678 0.4755 0.2664 0.049 Uiso 1 1 calc R . . 
C42 C 0.2647(3) 0.42060(16) 0.21381(17) 0.0554(10) Uani 1 1 d . . . 
H42A H 0.2630 0.3858 0.2361 0.066 Uiso 1 1 calc R . . 
C43 C 0.2044(3) 0.41842(18) 0.16349(19) 0.0645(11) Uani 1 1 d . . . 
H43A H 0.1614 0.3822 0.1514 0.077 Uiso 1 1 calc R . . 
C44 C 0.2070(3) 0.46947(19) 0.13074(15) 0.0589(10) Uani 1 1 d . . . 
H44A H 0.1645 0.4682 0.0966 0.071 Uiso 1 1 calc R . . 
C45 C 0.2719(3) 0.52245(16) 0.14806(13) 0.0450(8) Uani 1 1 d . . . 
H45A H 0.2745 0.5567 0.1254 0.054 Uiso 1 1 calc R . . 
C52 C 0.2135(3) 0.56457(13) 0.33066(11) 0.0307(6) Uani 1 1 d . . . 
C57 C 0.3296(3) 0.55106(14) 0.35360(11) 0.0378(7) Uani 1 1 d . . . 
H57A H 0.3940 0.5704 0.3409 0.045 Uiso 1 1 calc R . . 
C56 C 0.3515(3) 0.50919(15) 0.39523(13) 0.0478(8) Uani 1 1 d . . . 
H56A H 0.4304 0.5007 0.4108 0.057 Uiso 1 1 calc R . . 
C55 C 0.2580(4) 0.48042(16) 0.41358(13) 0.0545(10) Uani 1 1 d . . . 
H55A H 0.2730 0.4516 0.4413 0.065 Uiso 1 1 calc R . . 
C54 C 0.1425(3) 0.49356(15) 0.39150(13) 0.0502(9) Uani 1 1 d . . . 
H54A H 0.0786 0.4738 0.4044 0.060 Uiso 1 1 calc R . . 
C53 C 0.1197(3) 0.53575(14) 0.35036(12) 0.0407(7) Uani 1 1 d . . . 
H53A H 0.0404 0.5449 0.3357 0.049 Uiso 1 1 calc R . . 
C58 C 0.0909(2) 0.59440(14) 0.22467(11) 0.0312(6) Uani 1 1 d . . . 
C63 C 0.0617(3) 0.63459(16) 0.18258(12) 0.0437(8) Uani 1 1 d . . . 
H63A H 0.0980 0.6743 0.1831 0.052 Uiso 1 1 calc R . . 
C62 C -0.0201(3) 0.61700(19) 0.13998(13) 0.0576(10) Uani 1 1 d . . . 
H62A H -0.0410 0.6451 0.1120 0.069 Uiso 1 1 calc R . . 
C61 C -0.0712(3) 0.5581(2) 0.13844(14) 0.0588(10) Uani 1 1 d . . . 
H61A H -0.1261 0.5458 0.1092 0.071 Uiso 1 1 calc R . . 
C60 C -0.0419(3) 0.51765(17) 0.17945(13) 0.0495(9) Uani 1 1 d . . . 
H60A H -0.0769 0.4775 0.1783 0.059 Uiso 1 1 calc R . . 
C59 C 0.0391(3) 0.53541(14) 0.22270(12) 0.0386(7) Uani 1 1 d . . . 
H59A H 0.0590 0.5073 0.2507 0.046 Uiso 1 1 calc R . . 
C46 C 0.0778(2) 0.67155(13) 0.31203(11) 0.0298(6) Uani 1 1 d . . . 
C47 C 0.1143(3) 0.69453(16) 0.36166(12) 0.0431(8) Uani 1 1 d . . . 
H47A H 0.1941 0.6892 0.3773 0.052 Uiso 1 1 calc R . . 
C48 C 0.0361(3) 0.72518(17) 0.38880(13) 0.0527(9) Uani 1 1 d . . . 
H48A H 0.0628 0.7403 0.4227 0.063 Uiso 1 1 calc R . . 
C49 C -0.0797(3) 0.73373(19) 0.36664(15) 0.0580(10) Uani 1 1 d . . . 
H49A H -0.1332 0.7550 0.3850 0.070 Uiso 1 1 calc R . . 
C50 C -0.1174(3) 0.7111(2) 0.31751(16) 0.0710(13) Uani 1 1 d . . . 
H50A H -0.1975 0.7166 0.3022 0.085 Uiso 1 1 calc R . . 
C51 C -0.0393(3) 0.68029(17) 0.28985(13) 0.0517(9) Uani 1 1 d . . . 
H51A H -0.0664 0.6653 0.2559 0.062 Uiso 1 1 calc R . . 
B1 B 0.4661(3) 0.77115(15) 0.36467(13) 0.0312(7) Uani 1 1 d . . . 
C101 C 0.0441(4) 0.5602(2) 0.50207(18) 0.0828(13) Uiso 1 1 d . . . 
H10A H 0.0743 0.6014 0.5037 0.099 Uiso 1 1 calc R . . 
C100 C 0.1116(4) 0.5110(2) 0.52654(18) 0.0798(13) Uiso 1 1 d . . . 
H100 H 0.1887 0.5188 0.5446 0.096 Uiso 1 1 calc R . . 
C102 C -0.0676(4) 0.5472(2) 0.47544(18) 0.0809(13) Uiso 1 1 d . . . 
H102 H -0.1138 0.5799 0.4583 0.097 Uiso 1 1 calc R . . 
C202 C 1.0209(5) 0.3241(3) 0.9971(2) 0.1072(18) Uiso 1 1 d . . . 
H20F H 1.0762 0.3521 0.9827 0.129 Uiso 1 1 calc R . . 
H20G H 1.0501 0.3189 1.0346 0.129 Uiso 1 1 calc R . . 
C201 C 1.0210(7) 0.2632(4) 0.9716(3) 0.151(3) Uiso 1 1 d . . . 
H20D H 0.9658 0.2355 0.9866 0.182 Uiso 1 1 calc R . . 
H20E H 0.9891 0.2687 0.9345 0.182 Uiso 1 1 calc R . . 
C203 C 0.9002(7) 0.3540(4) 0.9905(3) 0.157(3) Uiso 1 1 d . . . 
H20H H 0.8727 0.3598 0.9531 0.189 Uiso 1 1 calc R . . 
H20L H 0.8448 0.3248 1.0037 0.189 Uiso 1 1 calc R . . 
C204 C 0.8926(8) 0.4150(4) 1.0168(3) 0.196(4) Uiso 1 1 d . . . 
H20I H 0.8112 0.4304 1.0099 0.294 Uiso 1 1 calc R . . 
H20J H 0.9454 0.4449 1.0036 0.294 Uiso 1 1 calc R . . 
H20K H 0.9164 0.4098 1.0542 0.294 Uiso 1 1 calc R . . 
C200 C 1.1294(7) 0.2330(4) 0.9751(3) 0.168(3) Uiso 1 1 d . . . 
H20A H 1.1186 0.1930 0.9570 0.252 Uiso 1 1 calc R . . 
H20B H 1.1614 0.2258 1.0116 0.252 Uiso 1 1 calc R . . 
H20C H 1.1845 0.2588 0.9591 0.252 Uiso 1 1 calc R . . 
  
loop_ 
 _atom_site_aniso_label 
 _atom_site_aniso_U_11 
 _atom_site_aniso_U_22 
 _atom_site_aniso_U_33 
 _atom_site_aniso_U_23 
 _atom_site_aniso_U_13 
 _atom_site_aniso_U_12 
Rh1 0.02080(11) 0.02388(11) 0.02820(11) -0.00129(9) 0.00506(8) 0.00141(9) 
S1 0.0243(4) 0.0317(4) 0.0370(4) -0.0028(3) 0.0083(3) -0.0011(3) 
P1 0.0289(4) 0.0265(4) 0.0302(4) -0.0009(3) 0.0072(3) 0.0029(3) 
P2 0.0225(4) 0.0278(4) 0.0287(4) -0.0006(3) 0.0046(3) 0.0001(3) 
F2 0.0829(16) 0.0342(11) 0.0912(17) -0.0017(11) 0.0218(13) 0.0136(11) 
F3 0.1137(19) 0.0341(11) 0.0665(14) -0.0148(10) 0.0241(13) -0.0208(12) 
F4 0.0726(15) 0.0671(14) 0.0548(13) -0.0176(10) -0.0049(11) -0.0249(12) 
F5 0.0453(11) 0.0539(12) 0.0661(13) -0.0166(10) -0.0137(10) 0.0053(10) 
F1 0.0451(11) 0.0421(11) 0.0682(13) -0.0050(9) 0.0001(10) 0.0118(9) 
F9 0.1002(19) 0.0679(15) 0.0848(17) 0.0113(13) -0.0166(14) 0.0467(14) 
F8 0.128(2) 0.0664(15) 0.0651(15) 0.0326(12) -0.0098(14) -0.0008(15) 
F7 0.0779(15) 0.0754(15) 0.0509(12) 0.0044(11) 0.0196(11) -0.0193(12) 
F6 0.0372(10) 0.0440(10) 0.0512(11) -0.0020(8) 0.0122(8) 0.0064(8) 
F10 0.0489(12) 0.0721(14) 0.0589(13) -0.0097(10) 0.0040(10) 0.0292(10) 
C21 0.0306(16) 0.0468(19) 0.0410(17) -0.0137(14) 0.0035(13) -0.0079(14) 
C8 0.0256(14) 0.0254(14) 0.0348(15) -0.0030(12) 0.0100(12) 0.0022(12) 
C7 0.0287(15) 0.0231(14) 0.0412(17) -0.0033(12) 0.0076(13) -0.0001(12) 
C6 0.0291(16) 0.0237(15) 0.0519(19) 0.0024(13) -0.0050(13) -0.0016(13) 
C5 0.0358(19) 0.045(2) 0.094(3) 0.008(2) 0.0068(19) 0.0089(17) 
C4 0.034(2) 0.064(3) 0.154(5) 0.031(3) -0.001(3) 0.016(2) 
C3 0.056(3) 0.062(3) 0.127(5) 0.039(3) -0.039(3) -0.006(2) 
C2 0.086(3) 0.053(2) 0.070(3) 0.018(2) -0.032(2) -0.014(2) 
C1 0.054(2) 0.0336(18) 0.057(2) 0.0044(16) -0.0091(17) -0.0011(16) 
C9 0.0352(16) 0.0308(16) 0.0333(15) -0.0018(12) 0.0063(12) -0.0014(13) 
C10 0.0421(18) 0.0314(16) 0.0372(17) 0.0018(13) 0.0093(14) 0.0005(14) 
C11 0.062(2) 0.0282(17) 0.050(2) 0.0025(14) 0.0193(17) 0.0092(17) 
C12 0.074(3) 0.0329(18) 0.0406(18) -0.0074(14) 0.0201(17) -0.0144(18) 
C13 0.052(2) 0.046(2) 0.0364(17) -0.0068(15) 0.0037(15) -0.0156(17) 
C14 0.0457(19) 0.0384(18) 0.0393(17) -0.0049(14) 0.0057(14) -0.0006(16) 
C15 0.0313(16) 0.0315(16) 0.0307(15) -0.0069(12) -0.0025(12) 0.0011(13) 
C20 0.0443(19) 0.044(2) 0.0380(17) -0.0065(14) -0.0060(14) 0.0131(16) 
C19 0.068(3) 0.042(2) 0.050(2) -0.0010(16) -0.0135(19) 0.0209(19) 
C18 0.075(3) 0.042(2) 0.0405(19) 0.0106(16) -0.0119(18) 0.0000(19) 
C17 0.053(2) 0.051(2) 0.0359(17) -0.0011(15) 0.0026(15) -0.0090(18) 
C16 0.0374(17) 0.0339(17) 0.0357(16) -0.0040(13) -0.0018(13) -0.0001(14) 
C22 0.0387(18) 0.0380(18) 0.0400(17) -0.0037(14) 0.0048(14) -0.0169(15) 
C27 0.062(2) 0.058(2) 0.050(2) -0.0116(17) 0.0221(18) -0.0240(19) 
C26 0.104(4) 0.090(3) 0.055(3) -0.008(2) 0.038(3) -0.044(3) 
C25 0.145(5) 0.080(4) 0.064(3) 0.020(3) 0.011(3) -0.055(4) 
C24 0.106(4) 0.056(3) 0.085(3) 0.025(2) -0.004(3) -0.022(3) 
C23 0.055(2) 0.044(2) 0.074(3) 0.0141(19) 0.0026(19) -0.0064(18) 
C34 0.0407(17) 0.0276(15) 0.0326(15) -0.0014(12) 0.0089(13) -0.0017(13) 
C35 0.052(2) 0.0320(17) 0.0475(19) 0.0017(14) 0.0202(15) 0.0020(15) 
C36 0.077(3) 0.045(2) 0.056(2) -0.0023(17) 0.037(2) -0.004(2) 
C37 0.093(3) 0.048(2) 0.0402(19) 0.0064(17) 0.024(2) -0.008(2) 
C38 0.076(3) 0.051(2) 0.048(2) 0.0148(17) 0.0062(19) 0.005(2) 
C39 0.0467(19) 0.045(2) 0.0434(18) 0.0064(15) 0.0083(15) 0.0070(16) 
C28 0.0304(15) 0.0314(16) 0.0379(16) 0.0055(12) 0.0095(13) 0.0053(13) 
C33 0.0420(18) 0.0380(18) 0.052(2) 0.0046(15) 0.0164(15) 0.0098(15) 
C32 0.051(2) 0.040(2) 0.087(3) 0.0098(19) 0.027(2) 0.0217(18) 
C31 0.045(2) 0.060(3) 0.092(3) 0.022(2) 0.003(2) 0.020(2) 
C30 0.055(2) 0.065(3) 0.067(3) 0.013(2) -0.0091(19) 0.012(2) 
C29 0.0408(18) 0.0367(18) 0.0489(19) 0.0040(14) 0.0014(15) 0.0077(15) 
C40 0.0343(16) 0.0278(15) 0.0437(17) -0.0081(13) 0.0146(13) 0.0012(13) 
C41 0.0382(17) 0.0328(17) 0.054(2) -0.0035(14) 0.0153(15) 0.0032(14) 
C42 0.049(2) 0.0297(18) 0.092(3) -0.0016(18) 0.025(2) -0.0013(16) 
C43 0.052(2) 0.042(2) 0.103(3) -0.028(2) 0.021(2) -0.0128(18) 
C44 0.053(2) 0.067(3) 0.057(2) -0.028(2) 0.0114(18) -0.011(2) 
C45 0.0454(19) 0.049(2) 0.0429(19) -0.0110(15) 0.0135(15) -0.0066(16) 
C52 0.0335(16) 0.0287(15) 0.0308(15) -0.0011(12) 0.0074(12) 0.0014(13) 
C57 0.0391(17) 0.0358(17) 0.0385(17) 0.0020(13) 0.0062(13) 0.0017(14) 
C56 0.053(2) 0.046(2) 0.0424(19) 0.0074(15) 0.0018(16) 0.0132(17) 
C55 0.087(3) 0.041(2) 0.0373(18) 0.0118(15) 0.0169(19) 0.012(2) 
C54 0.068(2) 0.0424(19) 0.0450(19) 0.0058(15) 0.0251(18) -0.0039(18) 
C53 0.0415(18) 0.0436(19) 0.0390(17) 0.0012(14) 0.0124(14) -0.0013(15) 
C58 0.0256(14) 0.0397(17) 0.0290(14) -0.0034(12) 0.0065(11) -0.0043(13) 
C63 0.0460(19) 0.048(2) 0.0362(17) 0.0022(14) 0.0033(14) -0.0110(16) 
C62 0.055(2) 0.078(3) 0.0374(19) 0.0081(18) -0.0021(16) -0.012(2) 
C61 0.048(2) 0.083(3) 0.042(2) -0.0138(19) -0.0037(16) -0.019(2) 
C60 0.045(2) 0.053(2) 0.051(2) -0.0154(17) 0.0086(16) -0.0198(17) 
C59 0.0359(17) 0.0387(18) 0.0418(17) -0.0028(14) 0.0077(14) -0.0045(14) 
C46 0.0232(14) 0.0311(15) 0.0360(15) -0.0025(12) 0.0070(11) 0.0004(12) 
C47 0.0288(16) 0.058(2) 0.0419(18) -0.0121(15) 0.0038(13) 0.0063(15) 
C48 0.0376(19) 0.076(3) 0.045(2) -0.0215(18) 0.0073(15) 0.0065(18) 
C49 0.0335(19) 0.080(3) 0.062(2) -0.026(2) 0.0128(16) 0.0125(18) 
C50 0.0249(18) 0.112(4) 0.074(3) -0.033(3) 0.0015(17) 0.014(2) 
C51 0.0292(17) 0.079(3) 0.0457(19) -0.0200(18) 0.0001(14) 0.0103(17) 
B1 0.0268(17) 0.0318(18) 0.0337(17) -0.0043(14) 0.0009(13) 0.0013(14) 
  
_geom_special_details 
; 
 All esds (except the esd in the dihedral angle between two l.s. planes) 
 are estimated using the full covariance matrix.  The cell esds are taken 
 into account individually in the estimation of esds in distances, angles 
 and torsion angles; correlations between esds in cell parameters are only 
 used when they are defined by crystal symmetry.  An approximate (isotropic) 
 treatment of cell esds is used for estimating esds involving l.s. planes. 
; 
  
loop_ 
 _geom_bond_atom_site_label_1 
 _geom_bond_atom_site_label_2 
 _geom_bond_distance 
 _geom_bond_site_symmetry_2 
 _geom_bond_publ_flag 
Rh1 C7 2.227(3) . ? 
Rh1 P2 2.2701(7) . ? 
Rh1 C8 2.284(3) . ? 
Rh1 P1 2.3133(7) . ? 
Rh1 S1 2.3918(7) . ? 
S1 C22 1.786(3) . ? 
S1 C21 1.825(3) . ? 
P1 C34 1.836(3) . ? 
P1 C28 1.836(3) . ? 
P1 C40 1.839(3) . ? 
P2 C52 1.829(3) . ? 
P2 C58 1.830(3) . ? 
P2 C46 1.840(3) . ? 
F2 C11 1.345(4) . ? 
F3 C12 1.349(3) . ? 
F4 C13 1.350(4) . ? 
F5 C14 1.361(4) . ? 
F1 C10 1.348(3) . ? 
F9 C19 1.348(4) . ? 
F8 C18 1.353(4) . ? 
F7 C17 1.345(4) . ? 
F6 C16 1.351(3) . ? 
F10 C20 1.357(4) . ? 
C21 B1 1.648(4) . ? 
C21 H21A 0.9800 . ? 
C21 H21B 0.9800 . ? 
C8 C7 1.226(4) . ? 
C8 B1 1.601(4) . ? 
C7 C6 1.454(4) . ? 
C6 C1 1.387(5) . ? 
C6 C5 1.393(5) . ? 
C5 C4 1.388(6) . ? 
C5 H5A 0.9400 . ? 
C4 C3 1.361(7) . ? 
C4 H4A 0.9400 . ? 
C3 C2 1.364(7) . ? 
C3 H3A 0.9400 . ? 
C2 C1 1.386(5) . ? 
C2 H2A 0.9400 . ? 
C1 H1A 0.9400 . ? 
C9 C10 1.382(4) . ? 
C9 C14 1.384(4) . ? 
C9 B1 1.646(4) . ? 
C10 C11 1.381(4) . ? 
C11 C12 1.370(5) . ? 
C12 C13 1.360(5) . ? 
C13 C14 1.375(4) . ? 
C15 C20 1.387(4) . ? 
C15 C16 1.389(4) . ? 
C15 B1 1.644(4) . ? 
C20 C19 1.379(5) . ? 
C19 C18 1.358(5) . ? 
C18 C17 1.371(5) . ? 
C17 C16 1.377(4) . ? 
C22 C27 1.378(5) . ? 
C22 C23 1.385(5) . ? 
C27 C26 1.398(5) . ? 
C27 H27A 0.9400 . ? 
C26 C25 1.372(7) . ? 
C26 H26A 0.9400 . ? 
C25 C24 1.363(7) . ? 
C25 H25A 0.9400 . ? 
C24 C23 1.377(6) . ? 
C24 H24A 0.9400 . ? 
C23 H23A 0.9400 . ? 
C34 C35 1.386(4) . ? 
C34 C39 1.392(4) . ? 
C35 C36 1.382(4) . ? 
C35 H35A 0.9400 . ? 
C36 C37 1.368(5) . ? 
C36 H36A 0.9400 . ? 
C37 C38 1.372(5) . ? 
C37 H37A 0.9400 . ? 
C38 C39 1.381(5) . ? 
C38 H38A 0.9400 . ? 
C39 H39A 0.9400 . ? 
C28 C29 1.378(4) . ? 
C28 C33 1.404(4) . ? 
C33 C32 1.379(5) . ? 
C33 H33A 0.9400 . ? 
C32 C31 1.386(6) . ? 
C32 H32A 0.9400 . ? 
C31 C30 1.377(6) . ? 
C31 H31A 0.9400 . ? 
C30 C29 1.385(4) . ? 
C30 H30A 0.9400 . ? 
C29 H29A 0.9400 . ? 
C40 C45 1.387(4) . ? 
C40 C41 1.396(4) . ? 
C41 C42 1.384(4) . ? 
C41 H41A 0.9400 . ? 
C42 C43 1.376(5) . ? 
C42 H42A 0.9400 . ? 
C43 C44 1.381(6) . ? 
C43 H43A 0.9400 . ? 
C44 C45 1.384(5) . ? 
C44 H44A 0.9400 . ? 
C45 H45A 0.9400 . ? 
C52 C57 1.388(4) . ? 
C52 C53 1.391(4) . ? 
C57 C56 1.391(4) . ? 
C57 H57A 0.9400 . ? 
C56 C55 1.370(5) . ? 
C56 H56A 0.9400 . ? 
C55 C54 1.375(5) . ? 
C55 H55A 0.9400 . ? 
C54 C53 1.387(4) . ? 
C54 H54A 0.9400 . ? 
C53 H53A 0.9400 . ? 
C58 C59 1.384(4) . ? 
C58 C63 1.384(4) . ? 
C63 C62 1.379(4) . ? 
C63 H63A 0.9400 . ? 
C62 C61 1.379(5) . ? 
C62 H62A 0.9400 . ? 
C61 C60 1.368(5) . ? 
C61 H61A 0.9400 . ? 
C60 C59 1.387(4) . ? 
C60 H60A 0.9400 . ? 
C59 H59A 0.9400 . ? 
C46 C51 1.376(4) . ? 
C46 C47 1.377(4) . ? 
C47 C48 1.376(4) . ? 
C47 H47A 0.9400 . ? 
C48 C49 1.362(5) . ? 
C48 H48A 0.9400 . ? 
C49 C50 1.365(5) . ? 
C49 H49A 0.9400 . ? 
C50 C51 1.386(5) . ? 
C50 H50A 0.9400 . ? 
C51 H51A 0.9400 . ? 
C101 C102 1.374(6) . ? 
C101 C100 1.392(6) . ? 
C101 H10A 0.9400 . ? 
C100 C102 1.334(6) 3_566 ? 
C100 H100 0.9400 . ? 
C102 C100 1.334(6) 3_566 ? 
C102 H102 0.9400 . ? 
C202 C201 1.455(8) . ? 
C202 C203 1.494(8) . ? 
C202 H20F 0.9800 . ? 
C202 H20G 0.9800 . ? 
C201 C200 1.377(9) . ? 
C201 H20D 0.9800 . ? 
C201 H20E 0.9800 . ? 
C203 C204 1.475(10) . ? 
C203 H20H 0.9800 . ? 
C203 H20L 0.9800 . ? 
C204 H20I 0.9700 . ? 
C204 H20J 0.9700 . ? 
C204 H20K 0.9700 . ? 
C200 H20A 0.9700 . ? 
C200 H20B 0.9700 . ? 
C200 H20C 0.9700 . ? 
  
loop_ 
 _geom_angle_atom_site_label_1 
 _geom_angle_atom_site_label_2 
 _geom_angle_atom_site_label_3 
 _geom_angle 
 _geom_angle_site_symmetry_1 
 _geom_angle_site_symmetry_3 
 _geom_angle_publ_flag 
C7 Rh1 P2 89.67(7) . . ? 
C7 Rh1 C8 31.51(10) . . ? 
P2 Rh1 C8 99.64(7) . . ? 
C7 Rh1 P1 157.90(8) . . ? 
P2 Rh1 P1 94.34(3) . . ? 
C8 Rh1 P1 163.77(7) . . ? 
C7 Rh1 S1 93.63(7) . . ? 
P2 Rh1 S1 168.74(3) . . ? 
C8 Rh1 S1 78.05(7) . . ? 
P1 Rh1 S1 86.64(3) . . ? 
C22 S1 C21 101.61(15) . . ? 
C22 S1 Rh1 113.43(10) . . ? 
C21 S1 Rh1 105.68(10) . . ? 
C34 P1 C28 105.11(13) . . ? 
C34 P1 C40 102.50(13) . . ? 
C28 P1 C40 98.67(13) . . ? 
C34 P1 Rh1 106.56(9) . . ? 
C28 P1 Rh1 117.57(10) . . ? 
C40 P1 Rh1 124.21(9) . . ? 
C52 P2 C58 107.36(13) . . ? 
C52 P2 C46 97.09(13) . . ? 
C58 P2 C46 100.25(13) . . ? 
C52 P2 Rh1 112.33(9) . . ? 
C58 P2 Rh1 118.85(9) . . ? 
C46 P2 Rh1 118.18(9) . . ? 
B1 C21 S1 115.1(2) . . ? 
B1 C21 H21A 108.5 . . ? 
S1 C21 H21A 108.5 . . ? 
B1 C21 H21B 108.5 . . ? 
S1 C21 H21B 108.5 . . ? 
H21A C21 H21B 107.5 . . ? 
C7 C8 B1 161.6(3) . . ? 
C7 C8 Rh1 71.67(18) . . ? 
B1 C8 Rh1 114.12(18) . . ? 
C8 C7 C6 160.4(3) . . ? 
C8 C7 Rh1 76.82(18) . . ? 
C6 C7 Rh1 122.7(2) . . ? 
C1 C6 C5 119.0(3) . . ? 
C1 C6 C7 120.9(3) . . ? 
C5 C6 C7 120.1(3) . . ? 
C4 C5 C6 119.2(4) . . ? 
C4 C5 H5A 120.4 . . ? 
C6 C5 H5A 120.4 . . ? 
C3 C4 C5 121.3(4) . . ? 
C3 C4 H4A 119.3 . . ? 
C5 C4 H4A 119.3 . . ? 
C4 C3 C2 119.8(4) . . ? 
C4 C3 H3A 120.1 . . ? 
C2 C3 H3A 120.1 . . ? 
C3 C2 C1 120.4(4) . . ? 
C3 C2 H2A 119.8 . . ? 
C1 C2 H2A 119.8 . . ? 
C2 C1 C6 120.2(4) . . ? 
C2 C1 H1A 119.9 . . ? 
C6 C1 H1A 119.9 . . ? 
C10 C9 C14 113.4(3) . . ? 
C10 C9 B1 127.3(3) . . ? 
C14 C9 B1 119.2(3) . . ? 
F1 C10 C11 115.7(3) . . ? 
F1 C10 C9 120.8(3) . . ? 
C11 C10 C9 123.5(3) . . ? 
F2 C11 C12 119.8(3) . . ? 
F2 C11 C10 120.3(3) . . ? 
C12 C11 C10 119.9(3) . . ? 
F3 C12 C13 120.3(3) . . ? 
F3 C12 C11 120.6(3) . . ? 
C13 C12 C11 119.1(3) . . ? 
F4 C13 C12 120.0(3) . . ? 
F4 C13 C14 120.9(3) . . ? 
C12 C13 C14 119.2(3) . . ? 
F5 C14 C13 115.9(3) . . ? 
F5 C14 C9 119.4(3) . . ? 
C13 C14 C9 124.8(3) . . ? 
C20 C15 C16 113.2(3) . . ? 
C20 C15 B1 127.5(3) . . ? 
C16 C15 B1 119.4(3) . . ? 
F10 C20 C19 116.0(3) . . ? 
F10 C20 C15 120.3(3) . . ? 
C19 C20 C15 123.8(3) . . ? 
F9 C19 C18 119.9(3) . . ? 
F9 C19 C20 120.1(4) . . ? 
C18 C19 C20 119.9(3) . . ? 
F8 C18 C19 120.5(4) . . ? 
F8 C18 C17 119.9(4) . . ? 
C19 C18 C17 119.6(3) . . ? 
F7 C17 C18 120.6(3) . . ? 
F7 C17 C16 120.7(3) . . ? 
C18 C17 C16 118.8(3) . . ? 
F6 C16 C17 116.1(3) . . ? 
F6 C16 C15 119.2(3) . . ? 
C17 C16 C15 124.7(3) . . ? 
C27 C22 C23 120.8(3) . . ? 
C27 C22 S1 117.1(3) . . ? 
C23 C22 S1 122.1(3) . . ? 
C22 C27 C26 119.0(4) . . ? 
C22 C27 H27A 120.5 . . ? 
C26 C27 H27A 120.5 . . ? 
C25 C26 C27 119.4(4) . . ? 
C25 C26 H26A 120.3 . . ? 
C27 C26 H26A 120.3 . . ? 
C24 C25 C26 121.2(4) . . ? 
C24 C25 H25A 119.4 . . ? 
C26 C25 H25A 119.4 . . ? 
C25 C24 C23 120.2(5) . . ? 
C25 C24 H24A 119.9 . . ? 
C23 C24 H24A 119.9 . . ? 
C24 C23 C22 119.4(4) . . ? 
C24 C23 H23A 120.3 . . ? 
C22 C23 H23A 120.3 . . ? 
C35 C34 C39 118.5(3) . . ? 
C35 C34 P1 124.5(2) . . ? 
C39 C34 P1 117.0(2) . . ? 
C36 C35 C34 120.1(3) . . ? 
C36 C35 H35A 120.0 . . ? 
C34 C35 H35A 120.0 . . ? 
C37 C36 C35 121.0(3) . . ? 
C37 C36 H36A 119.5 . . ? 
C35 C36 H36A 119.5 . . ? 
C36 C37 C38 119.4(3) . . ? 
C36 C37 H37A 120.3 . . ? 
C38 C37 H37A 120.3 . . ? 
C37 C38 C39 120.5(3) . . ? 
C37 C38 H38A 119.7 . . ? 
C39 C38 H38A 119.7 . . ? 
C38 C39 C34 120.4(3) . . ? 
C38 C39 H39A 119.8 . . ? 
C34 C39 H39A 119.8 . . ? 
C29 C28 C33 118.3(3) . . ? 
C29 C28 P1 121.0(2) . . ? 
C33 C28 P1 120.7(2) . . ? 
C32 C33 C28 120.4(3) . . ? 
C32 C33 H33A 119.8 . . ? 
C28 C33 H33A 119.8 . . ? 
C33 C32 C31 120.2(3) . . ? 
C33 C32 H32A 119.9 . . ? 
C31 C32 H32A 119.9 . . ? 
C30 C31 C32 120.1(3) . . ? 
C30 C31 H31A 120.0 . . ? 
C32 C31 H31A 120.0 . . ? 
C31 C30 C29 119.5(4) . . ? 
C31 C30 H30A 120.2 . . ? 
C29 C30 H30A 120.2 . . ? 
C28 C29 C30 121.6(3) . . ? 
C28 C29 H29A 119.2 . . ? 
C30 C29 H29A 119.2 . . ? 
C45 C40 C41 118.7(3) . . ? 
C45 C40 P1 122.6(2) . . ? 
C41 C40 P1 118.6(2) . . ? 
C42 C41 C40 120.5(3) . . ? 
C42 C41 H41A 119.8 . . ? 
C40 C41 H41A 119.8 . . ? 
C43 C42 C41 120.1(4) . . ? 
C43 C42 H42A 119.9 . . ? 
C41 C42 H42A 119.9 . . ? 
C42 C43 C44 120.0(3) . . ? 
C42 C43 H43A 120.0 . . ? 
C44 C43 H43A 120.0 . . ? 
C43 C44 C45 120.2(4) . . ? 
C43 C44 H44A 119.9 . . ? 
C45 C44 H44A 119.9 . . ? 
C44 C45 C40 120.5(3) . . ? 
C44 C45 H45A 119.8 . . ? 
C40 C45 H45A 119.8 . . ? 
C57 C52 C53 118.7(3) . . ? 
C57 C52 P2 119.2(2) . . ? 
C53 C52 P2 121.6(2) . . ? 
C52 C57 C56 120.6(3) . . ? 
C52 C57 H57A 119.7 . . ? 
C56 C57 H57A 119.7 . . ? 
C55 C56 C57 120.0(3) . . ? 
C55 C56 H56A 120.0 . . ? 
C57 C56 H56A 120.0 . . ? 
C56 C55 C54 120.2(3) . . ? 
C56 C55 H55A 119.9 . . ? 
C54 C55 H55A 119.9 . . ? 
C55 C54 C53 120.3(3) . . ? 
C55 C54 H54A 119.9 . . ? 
C53 C54 H54A 119.9 . . ? 
C54 C53 C52 120.3(3) . . ? 
C54 C53 H53A 119.9 . . ? 
C52 C53 H53A 119.9 . . ? 
C59 C58 C63 118.9(3) . . ? 
C59 C58 P2 124.8(2) . . ? 
C63 C58 P2 116.2(2) . . ? 
C62 C63 C58 120.7(3) . . ? 
C62 C63 H63A 119.6 . . ? 
C58 C63 H63A 119.6 . . ? 
C63 C62 C61 119.9(3) . . ? 
C63 C62 H62A 120.1 . . ? 
C61 C62 H62A 120.1 . . ? 
C60 C61 C62 120.0(3) . . ? 
C60 C61 H61A 120.0 . . ? 
C62 C61 H61A 120.0 . . ? 
C61 C60 C59 120.4(3) . . ? 
C61 C60 H60A 119.8 . . ? 
C59 C60 H60A 119.8 . . ? 
C58 C59 C60 120.1(3) . . ? 
C58 C59 H59A 119.9 . . ? 
C60 C59 H59A 119.9 . . ? 
C51 C46 C47 118.3(3) . . ? 
C51 C46 P2 124.4(2) . . ? 
C47 C46 P2 117.3(2) . . ? 
C48 C47 C46 121.3(3) . . ? 
C48 C47 H47A 119.3 . . ? 
C46 C47 H47A 119.3 . . ? 
C49 C48 C47 120.2(3) . . ? 
C49 C48 H48A 119.9 . . ? 
C47 C48 H48A 119.9 . . ? 
C48 C49 C50 119.3(3) . . ? 
C48 C49 H49A 120.4 . . ? 
C50 C49 H49A 120.4 . . ? 
C49 C50 C51 121.0(3) . . ? 
C49 C50 H50A 119.5 . . ? 
C51 C50 H50A 119.5 . . ? 
C46 C51 C50 120.0(3) . . ? 
C46 C51 H51A 120.0 . . ? 
C50 C51 H51A 120.0 . . ? 
C8 B1 C15 110.5(2) . . ? 
C8 B1 C9 114.9(2) . . ? 
C15 B1 C9 107.5(2) . . ? 
C8 B1 C21 102.1(2) . . ? 
C15 B1 C21 118.2(2) . . ? 
C9 B1 C21 103.7(2) . . ? 
C102 C101 C100 118.5(5) . . ? 
C102 C101 H10A 120.8 . . ? 
C100 C101 H10A 120.8 . . ? 
C102 C100 C101 120.4(5) 3_566 . ? 
C102 C100 H100 119.8 3_566 . ? 
C101 C100 H100 119.8 . . ? 
C100 C102 C101 121.1(5) 3_566 . ? 
C100 C102 H102 119.4 3_566 . ? 
C101 C102 H102 119.4 . . ? 
C201 C202 C203 113.1(6) . . ? 
C201 C202 H20F 109.0 . . ? 
C203 C202 H20F 109.0 . . ? 
C201 C202 H20G 109.0 . . ? 
C203 C202 H20G 109.0 . . ? 
H20F C202 H20G 107.8 . . ? 
C200 C201 C202 116.7(7) . . ? 
C200 C201 H20D 108.1 . . ? 
C202 C201 H20D 108.1 . . ? 
C200 C201 H20E 108.1 . . ? 
C202 C201 H20E 108.1 . . ? 
H20D C201 H20E 107.3 . . ? 
C204 C203 C202 116.1(7) . . ? 
C204 C203 H20H 108.3 . . ? 
C202 C203 H20H 108.3 . . ? 
C204 C203 H20L 108.3 . . ? 
C202 C203 H20L 108.3 . . ? 
H20H C203 H20L 107.4 . . ? 
C203 C204 H20I 109.5 . . ? 
C203 C204 H20J 109.5 . . ? 
H20I C204 H20J 109.5 . . ? 
C203 C204 H20K 109.5 . . ? 
H20I C204 H20K 109.5 . . ? 
H20J C204 H20K 109.5 . . ? 
C201 C200 H20A 109.5 . . ? 
C201 C200 H20B 109.5 . . ? 
H20A C200 H20B 109.5 . . ? 
C201 C200 H20C 109.5 . . ? 
H20A C200 H20C 109.5 . . ? 
H20B C200 H20C 109.5 . . ? 
  
_diffrn_measured_fraction_theta_max    0.984 
_diffrn_reflns_theta_full              27.48 
_diffrn_measured_fraction_theta_full   0.984 
_refine_diff_density_max    0.887 
_refine_diff_density_min   -0.598 
_refine_diff_density_rms    0.069 
#===end
 
data_fd040_0m 
  
_audit_creation_method            SHELXL-97 
_chemical_formula_sum 
 'C35 H24 B F10 Rh S' 
_chemical_formula_weight          780.32 
  
loop_ 
 _atom_type_symbol 
 _atom_type_description 
 _atom_type_scat_dispersion_real 
 _atom_type_scat_dispersion_imag 
 _atom_type_scat_source 
 'C'  'C'   0.0033   0.0016 
 'International Tables Vol C Tables 4.2.6.8 and 6.1.1.4' 
 'H'  'H'   0.0000   0.0000 
 'International Tables Vol C Tables 4.2.6.8 and 6.1.1.4' 
 'B'  'B'   0.0013   0.0007 
 'International Tables Vol C Tables 4.2.6.8 and 6.1.1.4' 
 'F'  'F'   0.0171   0.0103 
 'International Tables Vol C Tables 4.2.6.8 and 6.1.1.4' 
 'S'  'S'   0.1246   0.1234 
 'International Tables Vol C Tables 4.2.6.8 and 6.1.1.4' 
 'Rh'  'Rh'  -1.1178   0.9187 
 'International Tables Vol C Tables 4.2.6.8 and 6.1.1.4' 
  
_symmetry_cell_setting            Monoclinic 
_symmetry_space_group_name_H-M    P2(1)/n 
  
loop_ 
 _symmetry_equiv_pos_as_xyz 
 'x, y, z' 
 '-x+1/2, y+1/2, -z+1/2' 
 '-x, -y, -z' 
 'x-1/2, -y-1/2, z-1/2' 
  
_cell_length_a                    8.6116(4) 
_cell_length_b                    18.3794(11) 
_cell_length_c                    19.3884(12) 
_cell_angle_alpha                 90.00 
_cell_angle_beta                  91.026(2) 
_cell_angle_gamma                 90.00 
_cell_volume                      3068.2(3) 
_cell_formula_units_Z             4 
_cell_measurement_temperature     150(2) 
_cell_measurement_reflns_used     7331 
_cell_measurement_theta_min       2.45 
_cell_measurement_theta_max       27.38 
  
_exptl_crystal_description        block 
_exptl_crystal_colour             yellow 
_exptl_crystal_size_max           0.30 
_exptl_crystal_size_mid           0.10 
_exptl_crystal_size_min           0.10 
_exptl_crystal_density_meas       ? 
_exptl_crystal_density_diffrn     1.689 
_exptl_crystal_density_method     'not measured' 
_exptl_crystal_F_000              1560 
_exptl_absorpt_coefficient_mu     0.712 
_exptl_absorpt_correction_type    multi-scan 
_exptl_absorpt_correction_T_min   0.8148 
_exptl_absorpt_correction_T_max   0.9322 
_exptl_absorpt_process_details    sadabs 
  
_exptl_special_details 
; 
 ? 
; 
  
_diffrn_ambient_temperature       150(2) 
_diffrn_radiation_wavelength      0.71073 
_diffrn_radiation_type            MoK\a 
_diffrn_radiation_source          'fine-focus sealed tube' 
_diffrn_radiation_monochromator   graphite 
_diffrn_measurement_device_type   'Bruker APEX-II CCD' 
_diffrn_measurement_method        '\f and \w scans' 
_diffrn_detector_area_resol_mean  ? 
_diffrn_reflns_number             26368 
_diffrn_reflns_av_R_equivalents   0.0396 
_diffrn_reflns_av_sigmaI/netI     0.0458 
_diffrn_reflns_limit_h_min        -7 
_diffrn_reflns_limit_h_max        11 
_diffrn_reflns_limit_k_min        -23 
_diffrn_reflns_limit_k_max        23 
_diffrn_reflns_limit_l_min        -24 
_diffrn_reflns_limit_l_max        25 
_diffrn_reflns_theta_min          2.10 
_diffrn_reflns_theta_max          27.49 
_reflns_number_total              7030 
_reflns_number_gt                 5390 
_reflns_threshold_expression      >2sigma(I) 
  
_computing_data_collection        'Bruker APEX2' 
_computing_cell_refinement        'Bruker SAINT' 
_computing_data_reduction         'Bruker SAINT' 
_computing_structure_solution     'SHELXS-97 (Sheldrick, 2008)' 
_computing_structure_refinement   'SHELXL-97 (Sheldrick, 2008)' 
_computing_molecular_graphics     'Bruker SHELXTL' 
_computing_publication_material   'Bruker SHELXTL' 
  
_refine_special_details 
; 
 Refinement of F^2^ against ALL reflections.  The weighted R-factor wR and 
 goodness of fit S are based on F^2^, conventional R-factors R are based 
 on F, with F set to zero for negative F^2^. The threshold expression of 
 F^2^ > 2sigma(F^2^) is used only for calculating R-factors(gt) etc. and is 
 not relevant to the choice of reflections for refinement.  R-factors based 
 on F^2^ are statistically about twice as large as those based on F, and R- 
 factors based on ALL data will be even larger. 
; 
  
_refine_ls_structure_factor_coef  Fsqd 
_refine_ls_matrix_type            full 
_refine_ls_weighting_scheme       calc 
_refine_ls_weighting_details 
 'calc w=1/[\s^2^(Fo^2^)+(0.0224P)^2^+1.4438P] where P=(Fo^2^+2Fc^2^)/3' 
_atom_sites_solution_primary      direct 
_atom_sites_solution_secondary    difmap 
_atom_sites_solution_hydrogens    geom 
_refine_ls_hydrogen_treatment     constr 
_refine_ls_extinction_method      none 
_refine_ls_extinction_coef        ? 
_refine_ls_number_reflns          7030 
_refine_ls_number_parameters      433 
_refine_ls_number_restraints      0 
_refine_ls_R_factor_all           0.0513 
_refine_ls_R_factor_gt            0.0301 
_refine_ls_wR_factor_ref          0.0626 
_refine_ls_wR_factor_gt           0.0571 
_refine_ls_goodness_of_fit_ref    1.018 
_refine_ls_restrained_S_all       1.018 
_refine_ls_shift/su_max           0.001 
_refine_ls_shift/su_mean          0.000 
  
loop_ 
 _atom_site_label 
 _atom_site_type_symbol 
 _atom_site_fract_x 
 _atom_site_fract_y 
 _atom_site_fract_z 
 _atom_site_U_iso_or_equiv 
 _atom_site_adp_type 
 _atom_site_occupancy 
 _atom_site_symmetry_multiplicity 
 _atom_site_calc_flag 
 _atom_site_refinement_flags 
 _atom_site_disorder_assembly 
 _atom_site_disorder_group 
Rh1 Rh 0.202076(19) 0.827616(9) 0.241635(9) 0.01484(5) Uani 1 1 d . . . 
S1 S -0.04991(6) 0.78511(3) 0.27067(3) 0.01793(12) Uani 1 1 d . . . 
F1 F 0.12008(15) 1.01405(8) 0.42526(7) 0.0351(4) Uani 1 1 d . . . 
F2 F -0.00151(18) 1.12343(9) 0.49468(8) 0.0458(4) Uani 1 1 d . . . 
F3 F -0.28622(18) 1.17681(8) 0.46043(8) 0.0416(4) Uani 1 1 d . . . 
F4 F -0.45906(17) 1.11021(9) 0.35907(8) 0.0436(4) Uani 1 1 d . . . 
F5 F -0.33994(15) 0.99940(8) 0.28794(7) 0.0311(3) Uani 1 1 d . . . 
F6 F 0.15421(16) 1.05351(7) 0.25561(7) 0.0287(3) Uani 1 1 d . . . 
F7 F 0.14134(19) 1.12178(8) 0.13404(8) 0.0437(4) Uani 1 1 d . . . 
F8 F -0.0523(2) 1.07333(9) 0.03129(8) 0.0495(5) Uani 1 1 d . . . 
F9 F -0.23569(19) 0.95505(9) 0.05414(8) 0.0464(4) Uani 1 1 d . . . 
F10 F -0.22953(16) 0.88840(8) 0.17500(7) 0.0343(4) Uani 1 1 d . . . 
C1 C 0.4441(3) 0.79497(13) 0.39282(12) 0.0228(5) Uani 1 1 d . . . 
H1A H 0.3914 0.7576 0.3680 0.027 Uiso 1 1 calc R . . 
C2 C 0.5694(3) 0.77784(14) 0.43531(13) 0.0290(6) Uani 1 1 d . . . 
H2A H 0.6033 0.7288 0.4392 0.035 Uiso 1 1 calc R . . 
C3 C 0.6452(3) 0.83180(15) 0.47211(12) 0.0300(6) Uani 1 1 d . . . 
H3A H 0.7295 0.8197 0.5022 0.036 Uiso 1 1 calc R . . 
C4 C 0.5989(3) 0.90328(14) 0.46530(12) 0.0273(6) Uani 1 1 d . . . 
H4A H 0.6528 0.9403 0.4901 0.033 Uiso 1 1 calc R . . 
C5 C 0.4742(3) 0.92136(13) 0.42248(12) 0.0216(5) Uani 1 1 d . . . 
H5A H 0.4428 0.9707 0.4178 0.026 Uiso 1 1 calc R . . 
C6 C 0.3950(2) 0.86699(12) 0.38631(11) 0.0178(5) Uani 1 1 d . . . 
C7 C 0.2596(2) 0.88526(12) 0.34461(11) 0.0167(5) Uani 1 1 d . . . 
C8 C 0.1386(2) 0.91186(12) 0.32187(11) 0.0169(5) Uani 1 1 d . . . 
C9 C -0.1023(2) 1.00128(12) 0.35175(11) 0.0172(5) Uani 1 1 d . . . 
C10 C -0.0252(3) 1.03501(13) 0.40641(12) 0.0217(5) Uani 1 1 d . . . 
C11 C -0.0856(3) 1.09234(13) 0.44327(12) 0.0261(6) Uani 1 1 d . . . 
C12 C -0.2300(3) 1.11900(13) 0.42690(13) 0.0285(6) Uani 1 1 d . . . 
C13 C -0.3145(3) 1.08624(13) 0.37472(13) 0.0266(6) Uani 1 1 d . . . 
C14 C -0.2506(3) 1.02922(13) 0.33910(12) 0.0216(5) Uani 1 1 d . . . 
C15 C -0.0386(2) 0.96813(12) 0.22268(11) 0.0170(5) Uani 1 1 d . . . 
C16 C 0.0537(3) 1.02750(12) 0.20674(12) 0.0203(5) Uani 1 1 d . . . 
C17 C 0.0507(3) 1.06330(13) 0.14440(14) 0.0278(6) Uani 1 1 d . . . 
C18 C -0.0466(3) 1.03877(14) 0.09264(13) 0.0315(6) Uani 1 1 d . . . 
C19 C -0.1379(3) 0.97905(15) 0.10418(13) 0.0294(6) Uani 1 1 d . . . 
C20 C -0.1326(3) 0.94574(13) 0.16777(12) 0.0225(5) Uani 1 1 d . . . 
C21 C -0.1352(3) 0.86174(12) 0.31623(12) 0.0195(5) Uani 1 1 d . . . 
H21A H -0.2438 0.8689 0.3001 0.023 Uiso 1 1 calc R . . 
H21B H -0.1360 0.8513 0.3663 0.023 Uiso 1 1 calc R . . 
C22 C -0.0241(2) 0.71582(12) 0.33477(12) 0.0182(5) Uani 1 1 d . . . 
C23 C 0.0392(3) 0.72972(13) 0.39987(12) 0.0227(5) Uani 1 1 d . . . 
H23A H 0.0685 0.7778 0.4126 0.027 Uiso 1 1 calc R . . 
C24 C 0.0593(3) 0.67297(14) 0.44599(13) 0.0298(6) Uani 1 1 d . . . 
H24A H 0.1010 0.6824 0.4908 0.036 Uiso 1 1 calc R . . 
C25 C 0.0192(3) 0.60264(15) 0.42753(14) 0.0333(6) Uani 1 1 d . . . 
H25A H 0.0340 0.5639 0.4594 0.040 Uiso 1 1 calc R . . 
C26 C -0.0423(3) 0.58902(14) 0.36288(14) 0.0336(6) Uani 1 1 d . . . 
H26A H -0.0694 0.5407 0.3501 0.040 Uiso 1 1 calc R . . 
C27 C -0.0650(3) 0.64526(13) 0.31625(13) 0.0259(6) Uani 1 1 d . . . 
H27A H -0.1084 0.6356 0.2718 0.031 Uiso 1 1 calc R . . 
C28 C 0.2396(3) 0.72933(13) 0.18434(13) 0.0271(6) Uani 1 1 d . . . 
H28A H 0.1685 0.6885 0.1965 0.033 Uiso 1 1 calc R . . 
C29 C 0.1739(3) 0.78048(14) 0.13981(12) 0.0269(6) Uani 1 1 d . . . 
H29A H 0.0635 0.7699 0.1265 0.032 Uiso 1 1 calc R . . 
C30 C 0.2622(3) 0.82234(15) 0.08511(12) 0.0314(6) Uani 1 1 d . . . 
H30A H 0.1941 0.8291 0.0439 0.038 Uiso 1 1 calc R . . 
H30B H 0.3535 0.7935 0.0711 0.038 Uiso 1 1 calc R . . 
C31 C 0.3167(3) 0.89662(14) 0.11128(12) 0.0305(6) Uani 1 1 d . . . 
H31A H 0.4075 0.9122 0.0844 0.037 Uiso 1 1 calc R . . 
H31B H 0.2327 0.9326 0.1032 0.037 Uiso 1 1 calc R . . 
C32 C 0.3604(3) 0.89629(13) 0.18670(12) 0.0209(5) Uani 1 1 d . . . 
H32A H 0.3732 0.9459 0.2071 0.025 Uiso 1 1 calc R . . 
C33 C 0.4477(2) 0.84314(12) 0.21986(12) 0.0199(5) Uani 1 1 d . . . 
H33A H 0.5104 0.8616 0.2601 0.024 Uiso 1 1 calc R . . 
C34 C 0.5171(3) 0.77686(13) 0.18540(13) 0.0261(6) Uani 1 1 d . . . 
H34A H 0.6181 0.7651 0.2079 0.031 Uiso 1 1 calc R . . 
H34B H 0.5364 0.7881 0.1363 0.031 Uiso 1 1 calc R . . 
C35 C 0.4093(3) 0.71063(13) 0.18977(15) 0.0334(6) Uani 1 1 d . . . 
H35A H 0.4349 0.6763 0.1523 0.040 Uiso 1 1 calc R . . 
H35B H 0.4295 0.6855 0.2342 0.040 Uiso 1 1 calc R . . 
B1 B -0.0350(3) 0.93588(14) 0.30232(13) 0.0169(5) Uani 1 1 d . . . 
  
loop_ 
 _atom_site_aniso_label 
 _atom_site_aniso_U_11 
 _atom_site_aniso_U_22 
 _atom_site_aniso_U_33 
 _atom_site_aniso_U_23 
 _atom_site_aniso_U_13 
 _atom_site_aniso_U_12 
Rh1 0.01521(8) 0.01567(9) 0.01364(9) -0.00295(8) 0.00058(6) -0.00246(8) 
S1 0.0177(3) 0.0179(3) 0.0181(3) -0.0012(2) 0.0008(2) -0.0033(2) 
F1 0.0242(7) 0.0474(10) 0.0336(9) -0.0203(7) -0.0063(7) 0.0033(7) 
F2 0.0420(9) 0.0502(11) 0.0455(10) -0.0325(8) 0.0082(8) -0.0108(8) 
F3 0.0563(10) 0.0264(8) 0.0431(9) -0.0100(7) 0.0234(8) 0.0082(8) 
F4 0.0405(9) 0.0528(10) 0.0378(9) 0.0011(8) 0.0038(7) 0.0308(8) 
F5 0.0264(7) 0.0424(9) 0.0243(8) -0.0051(7) -0.0068(6) 0.0120(7) 
F6 0.0329(8) 0.0192(7) 0.0339(9) -0.0021(6) -0.0014(7) -0.0066(6) 
F7 0.0565(10) 0.0247(8) 0.0504(10) 0.0142(7) 0.0161(8) -0.0039(8) 
F8 0.0721(12) 0.0506(11) 0.0261(9) 0.0201(8) 0.0069(8) 0.0172(9) 
F9 0.0490(10) 0.0675(12) 0.0222(8) 0.0000(8) -0.0145(7) 0.0037(9) 
F10 0.0313(8) 0.0434(9) 0.0279(8) 0.0018(7) -0.0080(7) -0.0159(7) 
C1 0.0239(12) 0.0230(13) 0.0215(13) -0.0020(10) -0.0020(10) 0.0010(10) 
C2 0.0287(13) 0.0304(15) 0.0279(14) 0.0083(11) -0.0014(11) 0.0059(11) 
C3 0.0213(12) 0.0481(17) 0.0205(13) 0.0089(13) -0.0055(10) 0.0003(12) 
C4 0.0254(13) 0.0362(15) 0.0203(13) -0.0062(11) -0.0037(11) -0.0078(11) 
C5 0.0211(12) 0.0225(13) 0.0212(13) -0.0036(10) -0.0003(10) -0.0017(10) 
C6 0.0170(11) 0.0236(13) 0.0129(11) -0.0004(9) -0.0002(9) -0.0005(10) 
C7 0.0188(11) 0.0156(11) 0.0158(12) -0.0021(9) 0.0019(9) -0.0015(9) 
C8 0.0213(11) 0.0149(11) 0.0146(11) -0.0030(9) 0.0013(9) -0.0025(9) 
C9 0.0187(11) 0.0180(12) 0.0148(11) 0.0031(9) 0.0011(9) 0.0001(9) 
C10 0.0199(12) 0.0246(13) 0.0207(13) -0.0012(10) 0.0030(10) -0.0014(10) 
C11 0.0327(14) 0.0256(13) 0.0205(13) -0.0079(11) 0.0083(11) -0.0088(11) 
C12 0.0421(15) 0.0163(12) 0.0276(14) -0.0016(11) 0.0187(12) 0.0034(11) 
C13 0.0267(13) 0.0271(14) 0.0263(14) 0.0079(11) 0.0085(11) 0.0117(11) 
C14 0.0253(12) 0.0229(13) 0.0166(12) 0.0009(10) 0.0009(10) 0.0033(10) 
C15 0.0166(11) 0.0175(12) 0.0169(12) -0.0006(9) 0.0003(9) 0.0047(9) 
C16 0.0228(12) 0.0161(12) 0.0219(13) -0.0021(10) 0.0011(10) 0.0034(10) 
C17 0.0329(14) 0.0182(13) 0.0328(15) 0.0070(11) 0.0121(12) 0.0044(11) 
C18 0.0433(16) 0.0345(16) 0.0169(13) 0.0102(11) 0.0058(12) 0.0150(13) 
C19 0.0297(14) 0.0402(16) 0.0182(13) -0.0026(12) -0.0039(11) 0.0069(12) 
C20 0.0195(12) 0.0279(13) 0.0200(13) 0.0003(10) 0.0011(10) 0.0021(10) 
C21 0.0178(11) 0.0190(12) 0.0217(12) 0.0007(10) 0.0026(10) 0.0000(9) 
C22 0.0168(11) 0.0181(12) 0.0198(12) -0.0006(10) 0.0049(10) 0.0000(9) 
C23 0.0253(12) 0.0213(13) 0.0217(13) -0.0039(10) 0.0041(11) -0.0004(10) 
C24 0.0362(14) 0.0319(14) 0.0213(13) 0.0016(12) 0.0028(11) 0.0026(13) 
C25 0.0399(15) 0.0286(15) 0.0315(16) 0.0104(12) 0.0071(13) 0.0036(12) 
C26 0.0398(15) 0.0195(13) 0.0416(17) 0.0016(12) 0.0060(13) -0.0048(12) 
C27 0.0302(13) 0.0231(13) 0.0244(13) -0.0031(11) 0.0015(11) -0.0061(11) 
C28 0.0311(14) 0.0209(13) 0.0298(14) -0.0123(11) 0.0098(12) -0.0108(11) 
C29 0.0252(13) 0.0364(15) 0.0189(13) -0.0157(11) 0.0008(11) -0.0092(11) 
C30 0.0366(14) 0.0422(16) 0.0154(12) -0.0046(12) 0.0018(11) -0.0036(13) 
C31 0.0385(15) 0.0316(15) 0.0216(14) 0.0050(11) 0.0077(12) 0.0022(12) 
C32 0.0229(12) 0.0192(12) 0.0209(13) -0.0048(10) 0.0059(10) -0.0068(10) 
C33 0.0147(11) 0.0241(13) 0.0211(12) -0.0040(10) 0.0024(9) -0.0054(9) 
C34 0.0206(12) 0.0267(14) 0.0312(14) -0.0026(11) 0.0040(11) 0.0032(10) 
C35 0.0358(15) 0.0196(14) 0.0454(17) -0.0047(12) 0.0162(13) 0.0028(11) 
B1 0.0168(12) 0.0176(13) 0.0163(13) -0.0014(11) -0.0003(10) 0.0006(10) 
  
_geom_special_details 
; 
 All esds (except the esd in the dihedral angle between two l.s. planes) 
 are estimated using the full covariance matrix.  The cell esds are taken 
 into account individually in the estimation of esds in distances, angles 
 and torsion angles; correlations between esds in cell parameters are only 
 used when they are defined by crystal symmetry.  An approximate (isotropic) 
 treatment of cell esds is used for estimating esds involving l.s. planes. 
; 
  
loop_ 
 _geom_bond_atom_site_label_1 
 _geom_bond_atom_site_label_2 
 _geom_bond_distance 
 _geom_bond_site_symmetry_2 
 _geom_bond_publ_flag 
Rh1 C28 2.148(2) . ? 
Rh1 C32 2.154(2) . ? 
Rh1 C29 2.166(2) . ? 
Rh1 C33 2.183(2) . ? 
Rh1 C8 2.269(2) . ? 
Rh1 C7 2.306(2) . ? 
Rh1 S1 2.3833(6) . ? 
S1 C22 1.790(2) . ? 
S1 C21 1.824(2) . ? 
F1 C10 1.353(3) . ? 
F2 C11 1.348(3) . ? 
F3 C12 1.341(3) . ? 
F4 C13 1.350(3) . ? 
F5 C14 1.360(3) . ? 
F6 C16 1.359(3) . ? 
F7 C17 1.346(3) . ? 
F8 C18 1.349(3) . ? 
F9 C19 1.348(3) . ? 
F10 C20 1.353(3) . ? 
C1 C2 1.382(3) . ? 
C1 C6 1.395(3) . ? 
C1 H1A 0.9500 . ? 
C2 C3 1.379(4) . ? 
C2 H2A 0.9500 . ? 
C3 C4 1.378(4) . ? 
C3 H3A 0.9500 . ? 
C4 C5 1.386(3) . ? 
C4 H4A 0.9500 . ? 
C5 C6 1.392(3) . ? 
C5 H5A 0.9500 . ? 
C6 C7 1.447(3) . ? 
C7 C8 1.226(3) . ? 
C8 B1 1.598(3) . ? 
C9 C10 1.387(3) . ? 
C9 C14 1.394(3) . ? 
C9 B1 1.649(3) . ? 
C10 C11 1.380(3) . ? 
C11 C12 1.369(3) . ? 
C12 C13 1.375(4) . ? 
C13 C14 1.375(3) . ? 
C15 C16 1.388(3) . ? 
C15 C20 1.388(3) . ? 
C15 B1 1.654(3) . ? 
C16 C17 1.376(3) . ? 
C17 C18 1.372(4) . ? 
C18 C19 1.370(4) . ? 
C19 C20 1.377(3) . ? 
C21 B1 1.637(3) . ? 
C21 H21A 0.9900 . ? 
C21 H21B 0.9900 . ? 
C22 C27 1.389(3) . ? 
C22 C23 1.390(3) . ? 
C23 C24 1.383(3) . ? 
C23 H23A 0.9500 . ? 
C24 C25 1.383(4) . ? 
C24 H24A 0.9500 . ? 
C25 C26 1.375(4) . ? 
C25 H25A 0.9500 . ? 
C26 C27 1.385(3) . ? 
C26 H26A 0.9500 . ? 
C27 H27A 0.9500 . ? 
C28 C29 1.390(4) . ? 
C28 C35 1.503(3) . ? 
C28 H28A 1.0000 . ? 
C29 C30 1.524(3) . ? 
C29 H29A 1.0000 . ? 
C30 C31 1.527(4) . ? 
C30 H30A 0.9900 . ? 
C30 H30B 0.9900 . ? 
C31 C32 1.504(3) . ? 
C31 H31A 0.9900 . ? 
C31 H31B 0.9900 . ? 
C32 C33 1.384(3) . ? 
C32 H32A 1.0000 . ? 
C33 C34 1.517(3) . ? 
C33 H33A 1.0000 . ? 
C34 C35 1.534(3) . ? 
C34 H34A 0.9900 . ? 
C34 H34B 0.9900 . ? 
C35 H35A 0.9900 . ? 
C35 H35B 0.9900 . ? 
  
loop_ 
 _geom_angle_atom_site_label_1 
 _geom_angle_atom_site_label_2 
 _geom_angle_atom_site_label_3 
 _geom_angle 
 _geom_angle_site_symmetry_1 
 _geom_angle_site_symmetry_3 
 _geom_angle_publ_flag 
C28 Rh1 C32 97.73(9) . . ? 
C28 Rh1 C29 37.59(9) . . ? 
C32 Rh1 C29 81.09(9) . . ? 
C28 Rh1 C33 81.64(9) . . ? 
C32 Rh1 C33 37.21(8) . . ? 
C29 Rh1 C33 88.22(9) . . ? 
C28 Rh1 C8 165.67(9) . . ? 
C32 Rh1 C8 95.83(8) . . ? 
C29 Rh1 C8 150.90(9) . . ? 
C33 Rh1 C8 106.84(8) . . ? 
C28 Rh1 C7 143.32(9) . . ? 
C32 Rh1 C7 91.76(8) . . ? 
C29 Rh1 C7 172.66(8) . . ? 
C33 Rh1 C7 85.04(8) . . ? 
C8 Rh1 C7 31.07(7) . . ? 
C28 Rh1 S1 89.58(7) . . ? 
C32 Rh1 S1 153.65(6) . . ? 
C29 Rh1 S1 89.81(7) . . ? 
C33 Rh1 S1 167.95(6) . . ? 
C8 Rh1 S1 80.22(6) . . ? 
C7 Rh1 S1 97.38(5) . . ? 
C22 S1 C21 105.02(10) . . ? 
C22 S1 Rh1 107.14(7) . . ? 
C21 S1 Rh1 103.73(7) . . ? 
C2 C1 C6 120.2(2) . . ? 
C2 C1 H1A 119.9 . . ? 
C6 C1 H1A 119.9 . . ? 
C3 C2 C1 120.1(2) . . ? 
C3 C2 H2A 119.9 . . ? 
C1 C2 H2A 119.9 . . ? 
C4 C3 C2 120.2(2) . . ? 
C4 C3 H3A 119.9 . . ? 
C2 C3 H3A 119.9 . . ? 
C3 C4 C5 120.4(2) . . ? 
C3 C4 H4A 119.8 . . ? 
C5 C4 H4A 119.8 . . ? 
C4 C5 C6 119.8(2) . . ? 
C4 C5 H5A 120.1 . . ? 
C6 C5 H5A 120.1 . . ? 
C5 C6 C1 119.4(2) . . ? 
C5 C6 C7 119.8(2) . . ? 
C1 C6 C7 120.7(2) . . ? 
C8 C7 C6 164.8(2) . . ? 
C8 C7 Rh1 72.77(14) . . ? 
C6 C7 Rh1 122.39(15) . . ? 
C7 C8 B1 168.9(2) . . ? 
C7 C8 Rh1 76.16(14) . . ? 
B1 C8 Rh1 105.18(14) . . ? 
C10 C9 C14 113.2(2) . . ? 
C10 C9 B1 126.99(19) . . ? 
C14 C9 B1 119.77(19) . . ? 
F1 C10 C11 115.6(2) . . ? 
F1 C10 C9 120.5(2) . . ? 
C11 C10 C9 123.9(2) . . ? 
F2 C11 C12 119.6(2) . . ? 
F2 C11 C10 120.3(2) . . ? 
C12 C11 C10 120.2(2) . . ? 
F3 C12 C11 120.4(2) . . ? 
F3 C12 C13 120.9(2) . . ? 
C11 C12 C13 118.7(2) . . ? 
F4 C13 C12 119.8(2) . . ? 
F4 C13 C14 120.8(2) . . ? 
C12 C13 C14 119.5(2) . . ? 
F5 C14 C13 116.6(2) . . ? 
F5 C14 C9 119.0(2) . . ? 
C13 C14 C9 124.5(2) . . ? 
C16 C15 C20 113.0(2) . . ? 
C16 C15 B1 119.25(19) . . ? 
C20 C15 B1 127.6(2) . . ? 
F6 C16 C17 116.5(2) . . ? 
F6 C16 C15 118.8(2) . . ? 
C17 C16 C15 124.7(2) . . ? 
F7 C17 C18 120.1(2) . . ? 
F7 C17 C16 120.8(2) . . ? 
C18 C17 C16 119.1(2) . . ? 
F8 C18 C19 120.6(2) . . ? 
F8 C18 C17 120.2(2) . . ? 
C19 C18 C17 119.2(2) . . ? 
F9 C19 C18 119.8(2) . . ? 
F9 C19 C20 120.6(2) . . ? 
C18 C19 C20 119.5(2) . . ? 
F10 C20 C19 115.4(2) . . ? 
F10 C20 C15 120.2(2) . . ? 
C19 C20 C15 124.4(2) . . ? 
B1 C21 S1 110.19(15) . . ? 
B1 C21 H21A 109.6 . . ? 
S1 C21 H21A 109.6 . . ? 
B1 C21 H21B 109.6 . . ? 
S1 C21 H21B 109.6 . . ? 
H21A C21 H21B 108.1 . . ? 
C27 C22 C23 120.0(2) . . ? 
C27 C22 S1 117.17(18) . . ? 
C23 C22 S1 122.80(17) . . ? 
C24 C23 C22 119.4(2) . . ? 
C24 C23 H23A 120.3 . . ? 
C22 C23 H23A 120.3 . . ? 
C23 C24 C25 120.6(2) . . ? 
C23 C24 H24A 119.7 . . ? 
C25 C24 H24A 119.7 . . ? 
C26 C25 C24 119.8(2) . . ? 
C26 C25 H25A 120.1 . . ? 
C24 C25 H25A 120.1 . . ? 
C25 C26 C27 120.5(2) . . ? 
C25 C26 H26A 119.8 . . ? 
C27 C26 H26A 119.8 . . ? 
C26 C27 C22 119.7(2) . . ? 
C26 C27 H27A 120.1 . . ? 
C22 C27 H27A 120.1 . . ? 
C29 C28 C35 125.6(2) . . ? 
C29 C28 Rh1 71.89(14) . . ? 
C35 C28 Rh1 108.13(16) . . ? 
C29 C28 H28A 114.2 . . ? 
C35 C28 H28A 114.2 . . ? 
Rh1 C28 H28A 114.2 . . ? 
C28 C29 C30 124.8(2) . . ? 
C28 C29 Rh1 70.53(13) . . ? 
C30 C29 Rh1 112.54(16) . . ? 
C28 C29 H29A 113.8 . . ? 
C30 C29 H29A 113.8 . . ? 
Rh1 C29 H29A 113.8 . . ? 
C29 C30 C31 112.0(2) . . ? 
C29 C30 H30A 109.2 . . ? 
C31 C30 H30A 109.2 . . ? 
C29 C30 H30B 109.2 . . ? 
C31 C30 H30B 109.2 . . ? 
H30A C30 H30B 107.9 . . ? 
C32 C31 C30 112.9(2) . . ? 
C32 C31 H31A 109.0 . . ? 
C30 C31 H31A 109.0 . . ? 
C32 C31 H31B 109.0 . . ? 
C30 C31 H31B 109.0 . . ? 
H31A C31 H31B 107.8 . . ? 
C33 C32 C31 125.4(2) . . ? 
C33 C32 Rh1 72.55(13) . . ? 
C31 C32 Rh1 109.48(16) . . ? 
C33 C32 H32A 113.9 . . ? 
C31 C32 H32A 113.9 . . ? 
Rh1 C32 H32A 113.9 . . ? 
C32 C33 C34 125.2(2) . . ? 
C32 C33 Rh1 70.24(13) . . ? 
C34 C33 Rh1 111.76(15) . . ? 
C32 C33 H33A 113.9 . . ? 
C34 C33 H33A 113.9 . . ? 
Rh1 C33 H33A 113.9 . . ? 
C33 C34 C35 111.69(19) . . ? 
C33 C34 H34A 109.3 . . ? 
C35 C34 H34A 109.3 . . ? 
C33 C34 H34B 109.3 . . ? 
C35 C34 H34B 109.3 . . ? 
H34A C34 H34B 107.9 . . ? 
C28 C35 C34 113.8(2) . . ? 
C28 C35 H35A 108.8 . . ? 
C34 C35 H35A 108.8 . . ? 
C28 C35 H35B 108.8 . . ? 
C34 C35 H35B 108.8 . . ? 
H35A C35 H35B 107.7 . . ? 
C8 B1 C21 102.96(18) . . ? 
C8 B1 C9 113.60(18) . . ? 
C21 B1 C9 108.62(18) . . ? 
C8 B1 C15 108.79(18) . . ? 
C21 B1 C15 116.81(19) . . ? 
C9 B1 C15 106.29(18) . . ? 
  
_diffrn_measured_fraction_theta_max    0.999 
_diffrn_reflns_theta_full              27.49 
_diffrn_measured_fraction_theta_full   0.999 
_refine_diff_density_max    0.368 
_refine_diff_density_min   -0.364 
_refine_diff_density_rms    0.075 
#===end
 
data_fd037_0m 
 
_audit_creation_method            SHELXL-97 
_chemical_name_systematic 
; 
 ? 
; 
_chemical_name_common             ? 
_chemical_melting_point           ? 
_chemical_formula_moiety          ? 
_chemical_formula_sum 
 'C69 H58 B F10 P2 Rh S' 
_chemical_formula_weight          1284.87 
 
loop_ 
 _atom_type_symbol 
 _atom_type_description 
 _atom_type_scat_dispersion_real 
 _atom_type_scat_dispersion_imag 
 _atom_type_scat_source 
 'C'  'C'   0.0033   0.0016 
 'International Tables Vol C Tables 4.2.6.8 and 6.1.1.4' 
 'H'  'H'   0.0000   0.0000 
 'International Tables Vol C Tables 4.2.6.8 and 6.1.1.4' 
 'B'  'B'   0.0013   0.0007 
 'International Tables Vol C Tables 4.2.6.8 and 6.1.1.4' 
 'F'  'F'   0.0171   0.0103 
 'International Tables Vol C Tables 4.2.6.8 and 6.1.1.4' 
 'P'  'P'   0.1023   0.0942 
 'International Tables Vol C Tables 4.2.6.8 and 6.1.1.4' 
 'S'  'S'   0.1246   0.1234 
 'International Tables Vol C Tables 4.2.6.8 and 6.1.1.4' 
 'Rh'  'Rh'  -1.1178   0.9187 
 'International Tables Vol C Tables 4.2.6.8 and 6.1.1.4' 
 
_symmetry_cell_setting            monoclinic 
_symmetry_space_group_name_H-M    P2(1)/n 
 
loop_ 
 _symmetry_equiv_pos_as_xyz 
 'x, y, z' 
 '-x+1/2, y+1/2, -z+1/2' 
 '-x, -y, -z' 
 'x-1/2, -y-1/2, z-1/2' 
 
_cell_length_a                    12.0518(5) 
_cell_length_b                    25.9871(9) 
_cell_length_c                    19.0097(7) 
_cell_angle_alpha                 90.00 
_cell_angle_beta                  90.8760(10) 
_cell_angle_gamma                 90.00 
_cell_volume                      5953.0(4) 
_cell_formula_units_Z             4 
_cell_measurement_temperature     150(2) 
_cell_measurement_reflns_used     ? 
_cell_measurement_theta_min       ? 
_cell_measurement_theta_max       ? 
 
_exptl_crystal_description        ? 
_exptl_crystal_colour             ? 
_exptl_crystal_size_max           0.18 
_exptl_crystal_size_mid           0.16
_exptl_crystal_size_min           0.14
_exptl_crystal_density_meas       ? 
_exptl_crystal_density_diffrn     1.434 
_exptl_crystal_density_method     'not measured' 
_exptl_crystal_F_000              2632 
_exptl_absorpt_coefficient_mu     0.450 
_exptl_absorpt_correction_type    multi-scan 
_exptl_absorpt_correction_T_min   0.6308 
_exptl_absorpt_correction_T_max    0.7461  
_exptl_absorpt_process_details    ? 
 
_exptl_special_details 
; 
 ? 
; 
 
_diffrn_ambient_temperature       150(2) 
_diffrn_radiation_wavelength      0.71073 
_diffrn_radiation_type            MoK\a 
_diffrn_radiation_source          'fine-focus sealed tube' 
_diffrn_radiation_monochromator   graphite 
_diffrn_measurement_device_type   ? 
_diffrn_measurement_method        ? 
_diffrn_detector_area_resol_mean  ? 
_diffrn_standards_number          ? 
_diffrn_standards_interval_count  ? 
_diffrn_standards_interval_time   ? 
_diffrn_standards_decay_%         ? 
_diffrn_reflns_number             37173 
_diffrn_reflns_av_R_equivalents   0.0245 
_diffrn_reflns_av_sigmaI/netI     0.0235 
_diffrn_reflns_limit_h_min        -14 
_diffrn_reflns_limit_h_max        14 
_diffrn_reflns_limit_k_min        -30 
_diffrn_reflns_limit_k_max        25 
_diffrn_reflns_limit_l_min        -20 
_diffrn_reflns_limit_l_max        22 
_diffrn_reflns_theta_min          1.86 
_diffrn_reflns_theta_max          25.00 
_reflns_number_total              10469 
_reflns_number_gt                 9325 
_reflns_threshold_expression      >2sigma(I) 
 
_computing_data_collection        ? 
_computing_cell_refinement        ? 
_computing_data_reduction         ? 
_computing_structure_solution     'SHELXS-97 (Sheldrick, 1990)' 
_computing_structure_refinement   'SHELXL-97 (Sheldrick, 1997)' 
_computing_molecular_graphics     ? 
_computing_publication_material   ? 
 
_refine_special_details 
; 
 Refinement of F^2^ against ALL reflections.  The weighted R-factor wR and 
 goodness of fit S are based on F^2^, conventional R-factors R are based 
 on F, with F set to zero for negative F^2^. The threshold expression of 
 F^2^ > 2sigma(F^2^) is used only for calculating R-factors(gt) etc. and is 
 not relevant to the choice of reflections for refinement.  R-factors based 
 on F^2^ are statistically about twice as large as those based on F, and R- 
 factors based on ALL data will be even larger. 
; 
 
_refine_ls_structure_factor_coef  Fsqd  
_refine_ls_matrix_type            full 
_refine_ls_weighting_scheme       calc  
_refine_ls_weighting_details 
 'calc w=1/[\s^2^(Fo^2^)+(0.0330P)^2^+5.5699P] where P=(Fo^2^+2Fc^2^)/3' 
_atom_sites_solution_primary      direct 
_atom_sites_solution_secondary    difmap 
_atom_sites_solution_hydrogens    geom 
_refine_ls_hydrogen_treatment     mixed 
_refine_ls_extinction_method      none 
_refine_ls_extinction_coef        ? 
_refine_ls_number_reflns          10469 
_refine_ls_number_parameters      785 
_refine_ls_number_restraints      0 
_refine_ls_R_factor_all           0.0348 
_refine_ls_R_factor_gt            0.0290 
_refine_ls_wR_factor_ref          0.0764 
_refine_ls_wR_factor_gt           0.0727 
_refine_ls_goodness_of_fit_ref    1.067 
_refine_ls_restrained_S_all       1.067 
_refine_ls_shift/su_max           0.002 
_refine_ls_shift/su_mean          0.000 
 
loop_ 
 _atom_site_label 
 _atom_site_type_symbol 
 _atom_site_fract_x 
 _atom_site_fract_y 
 _atom_site_fract_z 
 _atom_site_U_iso_or_equiv 
 _atom_site_adp_type 
 _atom_site_occupancy 
 _atom_site_symmetry_multiplicity 
 _atom_site_calc_flag 
 _atom_site_refinement_flags 
 _atom_site_disorder_assembly 
 _atom_site_disorder_group 
Rh1 Rh 0.250986(13) 0.112311(6) 0.237668(8) 0.01517(6) Uani 1 1 d . . . 
P1 P 0.18211(5) 0.03009(2) 0.20535(3) 0.01872(12) Uani 1 1 d . . . 
S1 S 0.43331(4) 0.08539(2) 0.21182(3) 0.01857(12) Uani 1 1 d . . . 
B1 B 0.4577(2) 0.19121(9) 0.21077(13) 0.0179(5) Uani 1 1 d . . . 
F1 F 0.52884(12) 0.12767(5) 0.07876(7) 0.0327(3) Uani 1 1 d . . . 
C1 C 0.4756(2) 0.17126(10) 0.39469(12) 0.0281(5) Uani 1 1 d . . . 
H1A H 0.5066 0.1983 0.3677 0.034 Uiso 1 1 calc R . . 
P2 P 0.08172(4) 0.15064(2) 0.22917(3) 0.01752(12) Uani 1 1 d . . . 
F2 F 0.44915(15) 0.14053(6) -0.04984(7) 0.0444(4) Uani 1 1 d . . . 
C2 C 0.5323(2) 0.15343(11) 0.45412(13) 0.0360(6) Uani 1 1 d . . . 
H2A H 0.6012 0.1686 0.4675 0.043 Uiso 1 1 calc R . . 
F3 F 0.31437(16) 0.22165(7) -0.08220(8) 0.0534(5) Uani 1 1 d . . . 
C3 C 0.4893(2) 0.11391(11) 0.49376(13) 0.0383(6) Uani 1 1 d . . . 
H3A H 0.5291 0.1012 0.5336 0.046 Uiso 1 1 calc R . . 
F4 F 0.26310(13) 0.29075(6) 0.02079(8) 0.0447(4) Uani 1 1 d . . . 
C4 C 0.3878(2) 0.09298(11) 0.47497(13) 0.0378(6) Uani 1 1 d . . . 
H4A H 0.3573 0.0659 0.5022 0.045 Uiso 1 1 calc R . . 
F5 F 0.33746(11) 0.27744(5) 0.15108(7) 0.0275(3) Uani 1 1 d . . . 
C5 C 0.3303(2) 0.11131(9) 0.41657(12) 0.0284(5) Uani 1 1 d . . . 
H5A H 0.2596 0.0972 0.4050 0.034 Uiso 1 1 calc R . . 
F6 F 0.39049(11) 0.28484(5) 0.29952(8) 0.0344(3) Uani 1 1 d . . . 
C6 C 0.37397(18) 0.15000(9) 0.37423(11) 0.0220(5) Uani 1 1 d . . . 
F7 F 0.52099(14) 0.36142(5) 0.33862(8) 0.0433(4) Uani 1 1 d . . . 
C7 C 0.30514(17) 0.17091(8) 0.31475(11) 0.0186(4) Uani 1 1 d . . . 
H7A H 0.2404 0.1908 0.3326 0.022 Uiso 1 1 calc R . . 
F8 F 0.73753(15) 0.36392(6) 0.30008(11) 0.0591(5) Uani 1 1 d . . . 
C8 C 0.33752(17) 0.18909(8) 0.24969(11) 0.0176(4) Uani 1 1 d . . . 
H8A H 0.2884 0.2179 0.2334 0.021 Uiso 1 1 calc R . . 
F9 F 0.81900(13) 0.28705(7) 0.21742(11) 0.0588(5) Uani 1 1 d . . . 
C9 C 0.42983(17) 0.19921(8) 0.12526(11) 0.0189(4) Uani 1 1 d . . . 
F10 F 0.68957(11) 0.20976(5) 0.17656(8) 0.0352(3) Uani 1 1 d . . . 
C10 C 0.45835(19) 0.16767(8) 0.06943(12) 0.0235(5) Uani 1 1 d . . . 
C11 C 0.4195(2) 0.17397(9) 0.00104(12) 0.0296(5) Uani 1 1 d . . . 
C12 C 0.3518(2) 0.21474(10) -0.01579(12) 0.0327(6) Uani 1 1 d . . . 
C13 C 0.3259(2) 0.24890(9) 0.03619(13) 0.0298(5) Uani 1 1 d . . . 
C14 C 0.36479(18) 0.24099(8) 0.10365(11) 0.0217(5) Uani 1 1 d . . . 
C15 C 0.53299(18) 0.24159(8) 0.23714(11) 0.0203(5) Uani 1 1 d . . . 
C16 C 0.49648(19) 0.28271(9) 0.27786(12) 0.0244(5) Uani 1 1 d . . . 
C17 C 0.5631(2) 0.32325(9) 0.29901(12) 0.0298(5) Uani 1 1 d . . . 
C18 C 0.6722(2) 0.32462(10) 0.27987(15) 0.0369(6) Uani 1 1 d . . . 
C19 C 0.7130(2) 0.28583(10) 0.23873(15) 0.0364(6) Uani 1 1 d . . . 
C20 C 0.64382(19) 0.24598(9) 0.21861(13) 0.0262(5) Uani 1 1 d . . . 
C21 C 0.52660(17) 0.13841(8) 0.22915(11) 0.0192(4) Uani 1 1 d . . . 
H21A H 0.5510 0.1383 0.2791 0.023 Uiso 1 1 calc R . . 
H21B H 0.5930 0.1357 0.1993 0.023 Uiso 1 1 calc R . . 
C22 C 0.50078(18) 0.03223(8) 0.25368(13) 0.0245(5) Uani 1 1 d . . . 
C23 C 0.51586(19) -0.01197(9) 0.21377(16) 0.0349(6) Uani 1 1 d . . . 
H23A H 0.4922 -0.0130 0.1659 0.042 Uiso 1 1 calc R . . 
C24 C 0.5661(2) -0.05482(10) 0.2448(2) 0.0510(9) Uani 1 1 d . . . 
H24A H 0.5758 -0.0853 0.2181 0.061 Uiso 1 1 calc R . . 
C25 C 0.6015(2) -0.05322(12) 0.3137(2) 0.0597(10) Uani 1 1 d . . . 
H25A H 0.6349 -0.0827 0.3346 0.072 Uiso 1 1 calc R . . 
C26 C 0.5888(2) -0.00888(13) 0.35242(18) 0.0524(9) Uani 1 1 d . . . 
H26A H 0.6148 -0.0078 0.3998 0.063 Uiso 1 1 calc R . . 
C27 C 0.5382(2) 0.03436(10) 0.32310(14) 0.0350(6) Uani 1 1 d . . . 
H27A H 0.5295 0.0648 0.3501 0.042 Uiso 1 1 calc R . . 
C28 C 0.25683(18) 0.00347(9) 0.13030(12) 0.0230(5) Uani 1 1 d . . . 
C29 C 0.2771(2) -0.04922(9) 0.12165(14) 0.0312(6) Uani 1 1 d . . . 
H29A H 0.2534 -0.0730 0.1563 0.037 Uiso 1 1 calc R . . 
C30 C 0.3316(2) -0.06666(10) 0.06274(15) 0.0384(7) Uani 1 1 d . . . 
H30A H 0.3449 -0.1025 0.0573 0.046 Uiso 1 1 calc R . . 
C31 C 0.3668(2) -0.03299(11) 0.01184(14) 0.0377(7) Uani 1 1 d . . . 
H31A H 0.4042 -0.0454 -0.0284 0.045 Uiso 1 1 calc R . . 
C32 C 0.34734(19) 0.01927(10) 0.01989(13) 0.0316(6) Uani 1 1 d . . . 
H32A H 0.3712 0.0428 -0.0150 0.038 Uiso 1 1 calc R . . 
C33 C 0.29303(18) 0.03718(9) 0.07873(12) 0.0249(5) Uani 1 1 d . . . 
H33A H 0.2803 0.0730 0.0839 0.030 Uiso 1 1 calc R . . 
C34 C 0.20224(19) -0.01706(8) 0.27628(12) 0.0248(5) Uani 1 1 d . . . 
C35 C 0.1516(2) -0.06539(9) 0.27458(14) 0.0354(6) Uani 1 1 d . . . 
H35A H 0.1040 -0.0744 0.2362 0.042 Uiso 1 1 calc R . . 
C36 C 0.1705(2) -0.10015(10) 0.32830(16) 0.0439(7) Uani 1 1 d . . . 
H36A H 0.1372 -0.1333 0.3261 0.053 Uiso 1 1 calc R . . 
C37 C 0.2372(2) -0.08718(11) 0.38508(15) 0.0428(7) Uani 1 1 d . . . 
H37A H 0.2489 -0.1111 0.4222 0.051 Uiso 1 1 calc R . . 
C38 C 0.2868(2) -0.03947(11) 0.38791(14) 0.0380(6) Uani 1 1 d . . . 
H38A H 0.3325 -0.0304 0.4272 0.046 Uiso 1 1 calc R . . 
C39 C 0.27019(19) -0.00448(9) 0.33333(12) 0.0280(5) Uani 1 1 d . . . 
H39A H 0.3055 0.0282 0.3351 0.034 Uiso 1 1 calc R . . 
C40 C 0.03807(18) 0.01532(8) 0.17939(12) 0.0210(5) Uani 1 1 d . . . 
C41 C 0.00714(19) 0.00520(9) 0.11016(12) 0.0280(5) Uani 1 1 d . . . 
H41A H 0.0611 0.0065 0.0743 0.034 Uiso 1 1 calc R . . 
C42 C -0.1022(2) -0.00689(11) 0.09308(13) 0.0372(6) Uani 1 1 d . . . 
H42A H -0.1224 -0.0140 0.0456 0.045 Uiso 1 1 calc R . . 
C43 C -0.1817(2) -0.00866(11) 0.14429(14) 0.0368(6) Uani 1 1 d . . . 
H43A H -0.2565 -0.0168 0.1322 0.044 Uiso 1 1 calc R . . 
C44 C -0.1520(2) 0.00143(10) 0.21347(13) 0.0342(6) Uani 1 1 d . . . 
H44A H -0.2065 0.0004 0.2490 0.041 Uiso 1 1 calc R . . 
C45 C -0.04306(19) 0.01294(9) 0.23089(12) 0.0264(5) Uani 1 1 d . . . 
H45A H -0.0231 0.0193 0.2786 0.032 Uiso 1 1 calc R . . 
C46 C 0.01705(19) 0.13772(8) 0.14324(11) 0.0219(5) Uani 1 1 d . . . 
C47 C 0.0877(2) 0.13943(9) 0.08591(12) 0.0277(5) Uani 1 1 d . . . 
H47A H 0.1646 0.1461 0.0932 0.033 Uiso 1 1 calc R . . 
C48 C 0.0464(2) 0.13146(11) 0.01811(13) 0.0397(6) Uani 1 1 d . . . 
H48A H 0.0948 0.1328 -0.0208 0.048 Uiso 1 1 calc R . . 
C49 C -0.0651(3) 0.12160(12) 0.00761(14) 0.0463(7) Uani 1 1 d . . . 
H49A H -0.0934 0.1159 -0.0386 0.056 Uiso 1 1 calc R . . 
C50 C -0.1353(2) 0.11998(11) 0.06406(14) 0.0411(7) Uani 1 1 d . . . 
H50A H -0.2121 0.1133 0.0565 0.049 Uiso 1 1 calc R . . 
C51 C -0.0949(2) 0.12805(9) 0.13192(13) 0.0288(5) Uani 1 1 d . . . 
H51A H -0.1439 0.1270 0.1706 0.035 Uiso 1 1 calc R . . 
C52 C -0.01968(18) 0.13598(9) 0.29680(11) 0.0226(5) Uani 1 1 d . . . 
C53 C -0.1226(2) 0.16047(10) 0.29801(13) 0.0315(6) Uani 1 1 d . . . 
H53A H -0.1409 0.1854 0.2632 0.038 Uiso 1 1 calc R . . 
C54 C -0.1984(2) 0.14864(12) 0.34971(15) 0.0422(7) Uani 1 1 d . . . 
H54A H -0.2689 0.1650 0.3497 0.051 Uiso 1 1 calc R . . 
C55 C -0.1714(2) 0.11320(12) 0.40104(15) 0.0471(7) Uani 1 1 d . . . 
H55A H -0.2239 0.1047 0.4360 0.056 Uiso 1 1 calc R . . 
C56 C -0.0680(2) 0.08999(11) 0.40190(14) 0.0404(7) Uani 1 1 d . . . 
H56A H -0.0490 0.0662 0.4381 0.048 Uiso 1 1 calc R . . 
C57 C 0.0079(2) 0.10141(10) 0.34989(12) 0.0284(5) Uani 1 1 d . . . 
H57A H 0.0789 0.0855 0.3507 0.034 Uiso 1 1 calc R . . 
C58 C 0.07756(17) 0.22150(9) 0.23162(12) 0.0241(5) Uani 1 1 d . . . 
C59 C 0.0763(2) 0.24713(10) 0.29613(14) 0.0329(6) Uani 1 1 d . . . 
H59A H 0.0714 0.2281 0.3386 0.040 Uiso 1 1 calc R . . 
C60 C 0.0823(2) 0.30062(11) 0.29831(18) 0.0466(8) Uani 1 1 d . . . 
H60A H 0.0823 0.3179 0.3424 0.056 Uiso 1 1 calc R . . 
C61 C 0.0881(2) 0.32855(11) 0.23718(19) 0.0493(8) Uani 1 1 d . . . 
H61A H 0.0939 0.3650 0.2391 0.059 Uiso 1 1 calc R . . 
C62 C 0.0856(2) 0.30409(10) 0.17358(18) 0.0439(7) Uani 1 1 d . . . 
H62A H 0.0872 0.3237 0.1314 0.053 Uiso 1 1 calc R . . 
C63 C 0.0809(2) 0.25075(9) 0.17017(14) 0.0319(6) Uani 1 1 d . . . 
H63A H 0.0799 0.2341 0.1257 0.038 Uiso 1 1 calc R . . 
C201 C -0.0938(6) -0.0571(4) 0.4031(5) 0.148(3) Uani 1 1 d . . . 
C202 C -0.1383(11) -0.1100(5) 0.4357(8) 0.099(4) Uani 0.50 1 d P . . 
C203 C -0.1186(10) -0.1004(7) 0.3915(8) 0.103(4) Uani 0.50 1 d P . . 
C204 C -0.0757(6) -0.1493(3) 0.4414(4) 0.134(2) Uani 1 1 d . . . 
C205 C -0.1559(7) -0.1849(5) 0.4494(5) 0.084(3) Uani 0.50 1 d P . . 
C206 C -0.1147(10) -0.1974(4) 0.4888(7) 0.074(3) Uani 0.50 1 d P . . 
C207 C -0.2302(8) -0.2188(4) 0.4752(4) 0.080(3) Uani 0.50 1 d P . . 
C208 C -0.1361(10) -0.2211(5) 0.5113(7) 0.086(3) Uani 0.50 1 d P . . 
C209 C -0.2344(6) -0.2650(2) 0.5198(3) 0.120(2) Uani 1 1 d . . . 
 
loop_ 
 _atom_site_aniso_label 
 _atom_site_aniso_U_11 
 _atom_site_aniso_U_22 
 _atom_site_aniso_U_33 
 _atom_site_aniso_U_23 
 _atom_site_aniso_U_13 
 _atom_site_aniso_U_12 
Rh1 0.01391(9) 0.01338(9) 0.01815(9) -0.00047(6) -0.00233(6) 0.00023(6) 
P1 0.0182(3) 0.0148(3) 0.0231(3) -0.0009(2) -0.0024(2) -0.0011(2) 
S1 0.0167(3) 0.0151(3) 0.0239(3) -0.0002(2) -0.0020(2) 0.0012(2) 
B1 0.0166(12) 0.0149(12) 0.0220(12) 0.0002(9) -0.0010(9) 0.0002(9) 
F1 0.0439(9) 0.0265(7) 0.0277(7) 0.0014(6) 0.0067(6) 0.0176(6) 
C1 0.0264(12) 0.0341(14) 0.0239(12) -0.0025(10) -0.0017(10) -0.0036(10) 
P2 0.0153(3) 0.0169(3) 0.0203(3) -0.0012(2) -0.0014(2) 0.0011(2) 
F2 0.0689(11) 0.0400(9) 0.0244(7) -0.0071(6) 0.0053(7) 0.0121(8) 
C2 0.0270(13) 0.0502(17) 0.0303(13) -0.0048(12) -0.0103(11) -0.0041(12) 
F3 0.0743(12) 0.0598(11) 0.0255(8) 0.0027(7) -0.0162(8) 0.0161(9) 
C3 0.0381(15) 0.0526(18) 0.0237(12) 0.0044(12) -0.0105(11) 0.0039(13) 
F4 0.0521(10) 0.0407(9) 0.0409(9) 0.0088(7) -0.0089(7) 0.0249(8) 
C4 0.0433(16) 0.0428(16) 0.0271(13) 0.0092(12) -0.0036(11) -0.0042(13) 
F5 0.0333(8) 0.0178(7) 0.0315(7) -0.0018(5) -0.0003(6) 0.0081(6) 
C5 0.0277(13) 0.0344(14) 0.0231(12) -0.0008(10) -0.0028(10) -0.0045(10) 
F6 0.0308(8) 0.0259(7) 0.0467(9) -0.0127(6) 0.0107(6) -0.0050(6) 
C6 0.0215(11) 0.0255(12) 0.0190(11) -0.0042(9) -0.0002(9) 0.0015(9) 
F7 0.0603(11) 0.0256(8) 0.0440(9) -0.0118(7) -0.0038(8) -0.0085(7) 
C7 0.0187(11) 0.0162(10) 0.0209(11) -0.0057(8) -0.0013(8) -0.0014(8) 
F8 0.0477(11) 0.0355(9) 0.0934(14) -0.0048(9) -0.0217(10) -0.0231(8) 
C8 0.0174(10) 0.0112(10) 0.0240(11) -0.0039(8) -0.0039(8) -0.0011(8) 
F9 0.0205(8) 0.0455(10) 0.1104(16) 0.0066(10) 0.0035(9) -0.0120(7) 
C9 0.0158(10) 0.0178(11) 0.0232(11) 0.0019(9) 0.0012(8) -0.0002(8) 
F10 0.0236(7) 0.0277(7) 0.0546(9) 0.0032(7) 0.0111(6) 0.0013(6) 
C10 0.0254(12) 0.0178(11) 0.0275(12) 0.0025(9) 0.0028(9) 0.0044(9) 
C11 0.0382(14) 0.0272(13) 0.0236(12) -0.0037(10) 0.0044(10) 0.0020(11) 
C12 0.0385(14) 0.0361(14) 0.0231(12) 0.0049(10) -0.0064(10) 0.0022(12) 
C13 0.0288(13) 0.0270(13) 0.0335(13) 0.0071(10) -0.0044(10) 0.0086(10) 
C14 0.0204(11) 0.0179(11) 0.0269(12) -0.0006(9) 0.0016(9) 0.0014(9) 
C15 0.0191(11) 0.0180(11) 0.0239(11) 0.0046(9) -0.0035(9) -0.0021(9) 
C16 0.0238(12) 0.0216(12) 0.0277(12) 0.0011(9) -0.0015(9) -0.0037(9) 
C17 0.0411(15) 0.0193(12) 0.0287(12) -0.0018(10) -0.0083(11) -0.0035(10) 
C18 0.0334(14) 0.0244(13) 0.0524(16) 0.0058(12) -0.0164(12) -0.0144(11) 
C19 0.0202(12) 0.0311(14) 0.0578(17) 0.0116(12) -0.0059(11) -0.0069(11) 
C20 0.0229(12) 0.0204(12) 0.0352(13) 0.0061(10) -0.0022(10) 0.0003(9) 
C21 0.0166(11) 0.0178(11) 0.0231(11) 0.0011(9) -0.0018(9) -0.0012(8) 
C22 0.0159(11) 0.0160(11) 0.0415(14) 0.0073(10) 0.0018(10) 0.0019(9) 
C23 0.0161(12) 0.0204(12) 0.0682(18) -0.0024(12) 0.0019(11) 0.0000(9) 
C24 0.0233(14) 0.0166(13) 0.113(3) 0.0065(15) 0.0094(16) 0.0031(11) 
C25 0.0291(15) 0.0337(17) 0.116(3) 0.0391(19) 0.0047(18) 0.0094(13) 
C26 0.0343(16) 0.057(2) 0.066(2) 0.0382(17) -0.0016(14) 0.0076(14) 
C27 0.0292(13) 0.0345(14) 0.0413(15) 0.0146(12) -0.0004(11) 0.0049(11) 
C28 0.0152(11) 0.0231(12) 0.0306(12) -0.0092(10) -0.0047(9) 0.0010(9) 
C29 0.0270(13) 0.0235(12) 0.0428(14) -0.0091(11) -0.0056(11) 0.0019(10) 
C30 0.0277(13) 0.0311(14) 0.0564(17) -0.0236(13) -0.0077(12) 0.0064(11) 
C31 0.0207(12) 0.0493(17) 0.0429(15) -0.0259(13) -0.0003(11) 0.0021(12) 
C32 0.0201(12) 0.0432(15) 0.0315(13) -0.0120(11) 0.0000(10) -0.0037(11) 
C33 0.0191(11) 0.0274(12) 0.0281(12) -0.0082(10) -0.0026(9) 0.0006(9) 
C34 0.0241(12) 0.0180(11) 0.0322(12) 0.0047(10) -0.0011(10) 0.0008(9) 
C35 0.0386(15) 0.0209(13) 0.0465(15) 0.0044(11) -0.0055(12) -0.0043(11) 
C36 0.0475(17) 0.0203(13) 0.0639(19) 0.0117(13) 0.0013(14) -0.0016(12) 
C37 0.0455(17) 0.0337(15) 0.0494(17) 0.0209(13) 0.0021(13) 0.0078(13) 
C38 0.0376(15) 0.0411(16) 0.0350(14) 0.0118(12) -0.0049(11) 0.0050(12) 
C39 0.0253(12) 0.0261(13) 0.0325(13) 0.0043(10) -0.0017(10) -0.0003(10) 
C40 0.0203(11) 0.0150(11) 0.0277(11) -0.0003(9) -0.0030(9) -0.0024(9) 
C41 0.0233(12) 0.0342(14) 0.0266(12) -0.0029(10) 0.0010(10) -0.0028(10) 
C42 0.0292(14) 0.0539(17) 0.0283(13) -0.0084(12) -0.0048(11) -0.0067(12) 
C43 0.0219(13) 0.0484(17) 0.0399(15) -0.0025(12) -0.0048(11) -0.0098(12) 
C44 0.0270(13) 0.0406(15) 0.0351(14) -0.0006(11) 0.0055(11) -0.0081(11) 
C45 0.0278(13) 0.0253(12) 0.0261(12) -0.0026(10) 0.0004(10) -0.0053(10) 
C46 0.0244(12) 0.0183(11) 0.0228(11) 0.0003(9) -0.0051(9) 0.0032(9) 
C47 0.0282(13) 0.0283(13) 0.0265(12) 0.0017(10) -0.0019(10) 0.0049(10) 
C48 0.0473(17) 0.0480(17) 0.0237(13) -0.0003(12) 0.0007(12) 0.0061(13) 
C49 0.0534(19) 0.0571(19) 0.0279(14) -0.0044(13) -0.0172(13) 0.0024(15) 
C50 0.0325(15) 0.0504(18) 0.0398(15) -0.0021(13) -0.0157(12) -0.0012(13) 
C51 0.0258(13) 0.0297(13) 0.0308(13) -0.0007(10) -0.0059(10) 0.0020(10) 
C52 0.0202(11) 0.0245(12) 0.0230(11) -0.0055(9) -0.0005(9) -0.0032(9) 
C53 0.0246(13) 0.0371(15) 0.0328(13) -0.0046(11) 0.0023(10) 0.0014(11) 
C54 0.0259(14) 0.0570(19) 0.0439(16) -0.0092(14) 0.0091(12) 0.0000(13) 
C55 0.0429(17) 0.063(2) 0.0353(15) -0.0047(14) 0.0184(13) -0.0117(15) 
C56 0.0477(17) 0.0463(17) 0.0272(13) 0.0053(12) 0.0045(12) -0.0061(13) 
C57 0.0274(13) 0.0341(14) 0.0238(12) -0.0018(10) -0.0006(10) -0.0021(10) 
C58 0.0142(11) 0.0204(12) 0.0377(13) -0.0029(10) -0.0017(9) 0.0034(9) 
C59 0.0266(13) 0.0281(13) 0.0441(15) -0.0096(11) -0.0002(11) 0.0032(10) 
C60 0.0363(16) 0.0315(15) 0.072(2) -0.0239(15) 0.0026(14) 0.0043(12) 
C61 0.0312(15) 0.0207(14) 0.096(3) -0.0027(16) 0.0082(15) 0.0048(11) 
C62 0.0348(15) 0.0233(14) 0.074(2) 0.0121(14) 0.0074(14) 0.0045(11) 
C63 0.0257(13) 0.0235(13) 0.0464(15) 0.0035(11) 0.0015(11) 0.0055(10) 
C201 0.101(5) 0.174(7) 0.170(7) 0.089(6) -0.008(4) -0.013(5) 
C202 0.101(9) 0.098(8) 0.100(9) -0.005(7) 0.046(7) 0.006(6) 
C203 0.060(7) 0.150(13) 0.100(9) -0.023(10) -0.019(6) 0.027(8) 
C204 0.105(5) 0.143(6) 0.151(6) 0.045(5) -0.039(4) -0.020(4) 
C205 0.050(5) 0.152(10) 0.051(5) -0.010(6) 0.007(4) -0.019(6) 
C206 0.080(7) 0.066(7) 0.077(7) 0.019(6) 0.020(6) 0.015(6) 
C207 0.095(7) 0.082(6) 0.063(5) -0.040(5) 0.002(5) 0.007(5) 
C208 0.088(8) 0.074(8) 0.097(8) 0.013(6) -0.007(6) 0.022(6) 
C209 0.179(6) 0.092(4) 0.089(4) -0.014(3) 0.006(4) -0.040(4) 
 
_geom_special_details 
; 
 All esds (except the esd in the dihedral angle between two l.s. planes) 
 are estimated using the full covariance matrix.  The cell esds are taken 
 into account individually in the estimation of esds in distances, angles 
 and torsion angles; correlations between esds in cell parameters are only 
 used when they are defined by crystal symmetry.  An approximate (isotropic) 
 treatment of cell esds is used for estimating esds involving l.s. planes. 
; 
 
loop_ 
 _geom_bond_atom_site_label_1 
 _geom_bond_atom_site_label_2 
 _geom_bond_distance 
 _geom_bond_site_symmetry_2 
 _geom_bond_publ_flag 
Rh1 C7 2.205(2) . ? 
Rh1 C8 2.261(2) . ? 
Rh1 P2 2.2737(6) . ? 
Rh1 S1 2.3648(5) . ? 
Rh1 P1 2.3700(6) . ? 
P1 C28 1.834(2) . ? 
P1 C34 1.835(2) . ? 
P1 C40 1.838(2) . ? 
S1 C22 1.784(2) . ? 
S1 C21 1.805(2) . ? 
B1 C8 1.637(3) . ? 
B1 C21 1.639(3) . ? 
B1 C15 1.666(3) . ? 
B1 C9 1.668(3) . ? 
F1 C10 1.352(3) . ? 
C1 C2 1.391(3) . ? 
C1 C6 1.394(3) . ? 
P2 C52 1.827(2) . ? 
P2 C46 1.830(2) . ? 
P2 C58 1.843(2) . ? 
F2 C11 1.352(3) . ? 
C2 C3 1.380(4) . ? 
F3 C12 1.346(3) . ? 
C3 C4 1.381(4) . ? 
F4 C13 1.355(3) . ? 
C4 C5 1.384(3) . ? 
F5 C14 1.352(2) . ? 
C5 C6 1.396(3) . ? 
F6 C16 1.349(3) . ? 
C6 C7 1.494(3) . ? 
F7 C17 1.349(3) . ? 
C7 C8 1.386(3) . ? 
F8 C18 1.342(3) . ? 
F9 C19 1.346(3) . ? 
C9 C10 1.388(3) . ? 
C9 C14 1.397(3) . ? 
F10 C20 1.358(3) . ? 
C10 C11 1.385(3) . ? 
C11 C12 1.372(4) . ? 
C12 C13 1.368(4) . ? 
C13 C14 1.374(3) . ? 
C15 C20 1.391(3) . ? 
C15 C16 1.395(3) . ? 
C16 C17 1.381(3) . ? 
C17 C18 1.369(4) . ? 
C18 C19 1.372(4) . ? 
C19 C20 1.380(3) . ? 
C22 C27 1.389(4) . ? 
C22 C23 1.390(3) . ? 
C23 C24 1.394(4) . ? 
C24 C25 1.371(5) . ? 
C25 C26 1.377(5) . ? 
C26 C27 1.391(4) . ? 
C28 C33 1.390(3) . ? 
C28 C29 1.401(3) . ? 
C29 C30 1.383(4) . ? 
C30 C31 1.377(4) . ? 
C31 C32 1.387(4) . ? 
C32 C33 1.385(3) . ? 
C34 C39 1.388(3) . ? 
C34 C35 1.396(3) . ? 
C35 C36 1.380(4) . ? 
C36 C37 1.378(4) . ? 
C37 C38 1.377(4) . ? 
C38 C39 1.392(3) . ? 
C40 C41 1.387(3) . ? 
C40 C45 1.395(3) . ? 
C41 C42 1.389(3) . ? 
C42 C43 1.377(4) . ? 
C43 C44 1.383(4) . ? 
C44 C45 1.382(3) . ? 
C46 C51 1.386(3) . ? 
C46 C47 1.394(3) . ? 
C47 C48 1.390(3) . ? 
C48 C49 1.379(4) . ? 
C49 C50 1.378(4) . ? 
C50 C51 1.388(4) . ? 
C52 C57 1.388(3) . ? 
C52 C53 1.395(3) . ? 
C53 C54 1.386(4) . ? 
C54 C55 1.377(4) . ? 
C55 C56 1.384(4) . ? 
C56 C57 1.390(4) . ? 
C58 C63 1.395(3) . ? 
C58 C59 1.396(3) . ? 
C59 C60 1.393(4) . ? 
C60 C61 1.373(5) . ? 
C61 C62 1.366(4) . ? 
C62 C63 1.389(4) . ? 
C201 C203 1.183(15) . ? 
C201 C202 1.602(14) . ? 
C202 C203 0.911(15) . ? 
C202 C204 1.274(14) . ? 
C202 C205 1.978(18) . ? 
C203 C204 1.664(17) . ? 
C204 C205 1.349(11) . ? 
C204 C206 1.615(12) . ? 
C205 C206 0.950(13) . ? 
C205 C207 1.352(14) . ? 
C205 C208 1.522(14) . ? 
C206 C208 0.794(11) . ? 
C206 C207 1.517(16) . ? 
C207 C208 1.318(14) . ? 
C207 C209 1.470(11) . ? 
C208 C209 1.654(14) . ? 
 
loop_ 
 _geom_angle_atom_site_label_1 
 _geom_angle_atom_site_label_2 
 _geom_angle_atom_site_label_3 
 _geom_angle 
 _geom_angle_site_symmetry_1 
 _geom_angle_site_symmetry_3 
 _geom_angle_publ_flag 
C7 Rh1 C8 36.12(8) . . ? 
C7 Rh1 P2 90.04(6) . . ? 
C8 Rh1 P2 91.86(5) . . ? 
C7 Rh1 S1 94.35(6) . . ? 
C8 Rh1 S1 81.57(5) . . ? 
P2 Rh1 S1 161.87(2) . . ? 
C7 Rh1 P1 153.36(6) . . ? 
C8 Rh1 P1 168.78(6) . . ? 
P2 Rh1 P1 93.80(2) . . ? 
S1 Rh1 P1 90.133(19) . . ? 
C28 P1 C34 105.00(11) . . ? 
C28 P1 C40 100.68(10) . . ? 
C34 P1 C40 99.88(10) . . ? 
C28 P1 Rh1 111.56(7) . . ? 
C34 P1 Rh1 111.69(8) . . ? 
C40 P1 Rh1 125.69(7) . . ? 
C22 S1 C21 103.37(10) . . ? 
C22 S1 Rh1 123.71(8) . . ? 
C21 S1 Rh1 108.32(7) . . ? 
C8 B1 C21 108.94(17) . . ? 
C8 B1 C15 111.85(17) . . ? 
C21 B1 C15 108.76(17) . . ? 
C8 B1 C9 106.18(17) . . ? 
C21 B1 C9 113.94(17) . . ? 
C15 B1 C9 107.21(17) . . ? 
C2 C1 C6 120.9(2) . . ? 
C52 P2 C46 108.02(10) . . ? 
C52 P2 C58 99.89(10) . . ? 
C46 P2 C58 101.22(10) . . ? 
C52 P2 Rh1 117.87(8) . . ? 
C46 P2 Rh1 110.63(7) . . ? 
C58 P2 Rh1 117.43(7) . . ? 
C3 C2 C1 120.5(2) . . ? 
C2 C3 C4 119.4(2) . . ? 
C3 C4 C5 120.2(2) . . ? 
C4 C5 C6 121.4(2) . . ? 
C1 C6 C5 117.5(2) . . ? 
C1 C6 C7 122.8(2) . . ? 
C5 C6 C7 119.2(2) . . ? 
C8 C7 C6 129.7(2) . . ? 
C8 C7 Rh1 74.15(12) . . ? 
C6 C7 Rh1 114.01(14) . . ? 
C7 C8 B1 132.69(19) . . ? 
C7 C8 Rh1 69.73(12) . . ? 
B1 C8 Rh1 113.19(13) . . ? 
C10 C9 C14 112.23(19) . . ? 
C10 C9 B1 128.55(19) . . ? 
C14 C9 B1 119.14(18) . . ? 
F1 C10 C11 114.6(2) . . ? 
F1 C10 C9 121.05(19) . . ? 
C11 C10 C9 124.3(2) . . ? 
F2 C11 C12 119.5(2) . . ? 
F2 C11 C10 120.4(2) . . ? 
C12 C11 C10 120.1(2) . . ? 
F3 C12 C13 120.9(2) . . ? 
F3 C12 C11 120.7(2) . . ? 
C13 C12 C11 118.3(2) . . ? 
F4 C13 C12 119.9(2) . . ? 
F4 C13 C14 120.2(2) . . ? 
C12 C13 C14 119.9(2) . . ? 
F5 C14 C13 115.75(19) . . ? 
F5 C14 C9 119.32(19) . . ? 
C13 C14 C9 124.9(2) . . ? 
C20 C15 C16 113.0(2) . . ? 
C20 C15 B1 120.61(19) . . ? 
C16 C15 B1 126.44(19) . . ? 
F6 C16 C17 115.4(2) . . ? 
F6 C16 C15 120.61(19) . . ? 
C17 C16 C15 124.0(2) . . ? 
F7 C17 C18 120.0(2) . . ? 
F7 C17 C16 120.1(2) . . ? 
C18 C17 C16 119.9(2) . . ? 
F8 C18 C17 120.3(3) . . ? 
F8 C18 C19 120.5(2) . . ? 
C17 C18 C19 119.1(2) . . ? 
F9 C19 C18 120.3(2) . . ? 
F9 C19 C20 120.4(2) . . ? 
C18 C19 C20 119.3(2) . . ? 
F10 C20 C19 115.8(2) . . ? 
F10 C20 C15 119.5(2) . . ? 
C19 C20 C15 124.7(2) . . ? 
B1 C21 S1 106.72(14) . . ? 
C27 C22 C23 120.5(2) . . ? 
C27 C22 S1 122.15(19) . . ? 
C23 C22 S1 117.32(19) . . ? 
C22 C23 C24 119.2(3) . . ? 
C25 C24 C23 120.5(3) . . ? 
C24 C25 C26 120.0(3) . . ? 
C25 C26 C27 120.9(3) . . ? 
C22 C27 C26 118.8(3) . . ? 
C33 C28 C29 118.4(2) . . ? 
C33 C28 P1 118.30(17) . . ? 
C29 C28 P1 123.25(19) . . ? 
C30 C29 C28 120.1(3) . . ? 
C31 C30 C29 121.1(2) . . ? 
C30 C31 C32 119.3(2) . . ? 
C33 C32 C31 120.1(3) . . ? 
C32 C33 C28 121.0(2) . . ? 
C39 C34 C35 118.8(2) . . ? 
C39 C34 P1 119.12(17) . . ? 
C35 C34 P1 122.05(18) . . ? 
C36 C35 C34 120.3(2) . . ? 
C37 C36 C35 120.5(3) . . ? 
C38 C37 C36 119.9(2) . . ? 
C37 C38 C39 120.1(3) . . ? 
C34 C39 C38 120.3(2) . . ? 
C41 C40 C45 118.4(2) . . ? 
C41 C40 P1 122.22(17) . . ? 
C45 C40 P1 119.34(17) . . ? 
C40 C41 C42 120.3(2) . . ? 
C43 C42 C41 120.7(2) . . ? 
C42 C43 C44 119.6(2) . . ? 
C43 C44 C45 120.0(2) . . ? 
C44 C45 C40 121.0(2) . . ? 
C51 C46 C47 119.3(2) . . ? 
C51 C46 P2 124.90(18) . . ? 
C47 C46 P2 115.77(17) . . ? 
C48 C47 C46 120.4(2) . . ? 
C49 C48 C47 119.7(3) . . ? 
C50 C49 C48 120.1(2) . . ? 
C49 C50 C51 120.5(3) . . ? 
C46 C51 C50 119.9(2) . . ? 
C57 C52 C53 119.1(2) . . ? 
C57 C52 P2 119.41(18) . . ? 
C53 C52 P2 121.40(18) . . ? 
C54 C53 C52 120.4(3) . . ? 
C55 C54 C53 120.0(3) . . ? 
C54 C55 C56 120.2(2) . . ? 
C55 C56 C57 120.1(3) . . ? 
C52 C57 C56 120.2(2) . . ? 
C63 C58 C59 118.5(2) . . ? 
C63 C58 P2 121.49(18) . . ? 
C59 C58 P2 119.98(19) . . ? 
C60 C59 C58 120.1(3) . . ? 
C61 C60 C59 120.4(3) . . ? 
C62 C61 C60 120.2(3) . . ? 
C61 C62 C63 120.4(3) . . ? 
C62 C63 C58 120.4(3) . . ? 
C203 C201 C202 34.2(8) . . ? 
C203 C202 C204 97.8(15) . . ? 
C203 C202 C201 46.8(13) . . ? 
C204 C202 C201 121.3(10) . . ? 
C203 C202 C205 114.9(17) . . ? 
C204 C202 C205 42.5(6) . . ? 
C201 C202 C205 158.8(9) . . ? 
C202 C203 C201 99.0(17) . . ? 
C202 C203 C204 49.3(12) . . ? 
C201 C203 C204 123.0(11) . . ? 
C202 C204 C205 97.8(10) . . ? 
C202 C204 C206 119.5(9) . . ? 
C205 C204 C206 36.0(6) . . ? 
C202 C204 C203 32.9(6) . . ? 
C205 C204 C203 111.8(9) . . ? 
C206 C204 C203 145.0(9) . . ? 
C206 C205 C204 87.5(11) . . ? 
C206 C205 C207 80.4(12) . . ? 
C204 C205 C207 165.2(9) . . ? 
C206 C205 C208 26.5(10) . . ? 
C204 C205 C208 114.0(9) . . ? 
C207 C205 C208 54.2(7) . . ? 
C206 C205 C202 112.6(13) . . ? 
C204 C205 C202 39.7(6) . . ? 
C207 C205 C202 139.6(9) . . ? 
C208 C205 C202 133.9(9) . . ? 
C208 C206 C205 121(2) . . ? 
C208 C206 C207 60.3(14) . . ? 
C205 C206 C207 61.5(11) . . ? 
C208 C206 C204 178(2) . . ? 
C205 C206 C204 56.6(9) . . ? 
C207 C206 C204 117.5(10) . . ? 
C208 C207 C205 69.5(8) . . ? 
C208 C207 C209 72.6(8) . . ? 
C205 C207 C209 140.3(10) . . ? 
C208 C207 C206 31.6(5) . . ? 
C205 C207 C206 38.1(5) . . ? 
C209 C207 C206 103.9(8) . . ? 
C206 C208 C207 88.2(16) . . ? 
C206 C208 C205 32.2(13) . . ? 
C207 C208 C205 56.3(7) . . ? 
C206 C208 C209 145.6(19) . . ? 
C207 C208 C209 58.0(8) . . ? 
C205 C208 C209 113.3(8) . . ? 
C207 C209 C208 49.5(5) . . ? 
 
_diffrn_measured_fraction_theta_max    0.998 
_diffrn_reflns_theta_full              25.00 
_diffrn_measured_fraction_theta_full   0.998 
_refine_diff_density_max    0.594 
_refine_diff_density_min   -0.482 
_refine_diff_density_rms    0.057 
#===end
